# Supplementary material for: Investigating the yield of H 2 O and H 2 from methane oxidation in the stratosphere
Source: Copernicus journal article supplement (doi:10.5194/acp-2018-170), 2018-03-05
Supplement: Supplementary file 2 [file acp-2018-170-supplement.zip]

# The Chemical Mechanism of MECCA

KPP version: 2.2.3\_rs

MECCA version: 3.8f

Date: March 23, 2017.

Selected reactions:

“(((Tr && (G || Het) && !I) || St) && !Hg)”

Number of aerosol phases: 0

Number of species in selected mechanism:

Gas phase: 253

Aqueous phase: 0

All species: 253

Number of reactions in selected mechanism:

Gas phase (Gmn): 304

Aqueous phase (Annn): 0

Henry (Hnn): 0

Photolysis (Jnn): 73

Aqueous phase photolysis (PHnn): 0

Heterogeneous (HETnn): 12

Equilibria (EQnn): 0

Isotope exchange (IEXnn): 0

Tagging equations (TAGnn): 410

Dummy (Dnn): 1

All equations: 800

This document is part of the electronic supplement to our article  
“The atmospheric chemistry box model CAABA/MECCA-3.0”  
in Geosci. Model Dev. (2011), available at:  
<http://www.geosci-model-dev.net>

Table 1: Gas phase reactions

| #      | labels    | reaction                                                                                       | rate coefficient                    | reference             |
|--------|-----------|------------------------------------------------------------------------------------------------|-------------------------------------|-----------------------|
| G1000  | UpStTrG   | $O_2 + O(^1D) \rightarrow O(^3P) + O_2$                                                        | $3.3E-11*EXP(55./temp)$             | Sander et al. (2011)  |
| G1001  | UpStTrG   | $O_2 + O(^3P) \rightarrow O_3$                                                                 | $6.E-34*((temp/300.)**(-2.4))*cair$ | Sander et al. (2011)  |
| G1002a | UpStG     | $O_3 + O(^1D) \rightarrow 2. LossO3O + 2. LossO3 + 2 O_2$                                      | 1.2E-10                             | Sander et al. (2011)* |
| G1003  | UpStG     | $O_3 + O(^3P) \rightarrow 2. LossO3O + 2. LossO3 + 2 O_2$                                      | $8.E-12*EXP(-2060./temp)$           | Sander et al. (2011)  |
| G2100  | UpStTrG   | $H + O_2 \rightarrow HO_2$                                                                     | tag_kG2100                          | Sander et al. (2011)  |
|        | tag: FHM  | $^{FHM}H + O_2 \rightarrow O_2 + ^{FHM}HO_2$                                                   | tag_kG2100                          |                       |
|        | tag: FHM  | $^{FHM}rH + O_2 \rightarrow O_2 + ^{FHM}rHO_2$                                                 | tag_kG2100                          |                       |
| G2101  | UpStG     | $H + O_3 \rightarrow LossO3H + LossO3 + OH + O_2$                                              | tag_kG2101                          | Sander et al. (2011)  |
|        | tag: FHM  | $^{FHM}H + O_3 \rightarrow O_3 + ^{FHM}OH + PTPFHM OH$                                         | tag_kG2101                          |                       |
|        | tag: FHM  | $^{FHM}rH + O_3 \rightarrow O_3 + ^{FHM}rOH + PTPFHM rOH$                                      | tag_kG2101                          |                       |
| G2102  | UpStG     | $H_2 + O(^1D) \rightarrow LossO3H + LossO3 + H + OH$                                           | tag_kG2102                          | Sander et al. (2011)  |
|        | tag: FHM  | $^{FHM}H_2 + O(^1D) \rightarrow O(^1D) + ^{FHM}H + ^{FHM}OH + PTPFHM OH + PTLFHM H_2$          | tag_kG2102                          |                       |
|        | tag: FHM  | $^{FHM}rH_2 + O(^1D) \rightarrow O(^1D) + ^{FHM}rH + ^{FHM}rOH + PTPFHM rOH + PTLFHM rH_2$     | tag_kG2102                          |                       |
| G2103  | UpStG     | $OH + O(^3P) \rightarrow LossO3H + LossO3 + H + O_2$                                           | tag_kG2103                          | Sander et al. (2011)  |
|        | tag: FHM  | $^{FHM}OH + O(^3P) \rightarrow O(^3P) + ^{FHM}H + PTLFHM OH$                                   | tag_kG2103                          |                       |
|        | tag: FHM  | $^{FHM}rOH + O(^3P) \rightarrow O(^3P) + ^{FHM}rH + PTLFHM rOH$                                | tag_kG2103                          |                       |
| G2104  | UpStTrG   | $OH + O_3 \rightarrow LossO3H + LossO3 + HO_2 + O_2$                                           | tag_kG2104                          | Sander et al. (2011)  |
|        | tag: FHM  | $^{FHM}OH + O_3 \rightarrow O_3 + ^{FHM}HO_2 + PTLFHM OH$                                      | tag_kG2104                          |                       |
|        | tag: FHM  | $^{FHM}rOH + O_3 \rightarrow O_3 + ^{FHM}rHO_2 + PTLFHM rOH$                                   | tag_kG2104                          |                       |
| G2105  | UpStTrG   | $OH + H_2 \rightarrow H_2O + H$                                                                | tag_kG2105                          | Sander et al. (2011)  |
|        | transfer: | $OH \rightarrow 0.5 H_2O$                                                                      |                                     |                       |
|        | tag: FHM  | $H_2 + ^{FHM}OH \rightarrow H_2 + 0.5 ^{FHM}H_2O + 0.5 PTPFHM H_2O + PTLFHM OH$                | tag_kG2105                          |                       |
|        | tag: FHM  | $H_2 + ^{FHM}rOH \rightarrow H_2 + 0.5 ^{FHM}rH_2O + 0.5 PTPFHM rH_2O + PTLFHM rOH$            | tag_kG2105                          |                       |
|        | transfer: | $H_2 \rightarrow 0.5 H_2O + H$                                                                 |                                     |                       |
|        | tag: FHM  | $OH + ^{FHM}H_2 \rightarrow OH + 0.5 ^{FHM}H_2O + 0.5 PTPFHM H_2O + ^{FHM}H + PTLFHM H_2$      | tag_kG2105                          |                       |
|        | tag: FHM  | $OH + ^{FHM}rH_2 \rightarrow OH + 0.5 ^{FHM}rH_2O + 0.5 PTPFHM rH_2O + ^{FHM}rH + PTLFHM rH_2$ | tag_kG2105                          |                       |
| G2106  | UpStG     | $HO_2 + O(^3P) \rightarrow LossO3H + LossO3 + OH + O_2$                                        | tag_kG2106                          | Sander et al. (2011)  |
|        | tag: FHM  | $^{FHM}HO_2 + O(^3P) \rightarrow O(^3P) + ^{FHM}OH + PTPFHM OH$                                | tag_kG2106                          |                       |

Table 1: Gas phase reactions (... continued)

| #      | labels   | reaction                                                                                                                                                                      | rate coefficient | reference            |
|--------|----------|-------------------------------------------------------------------------------------------------------------------------------------------------------------------------------|------------------|----------------------|
| G2107  | tag: FHM | ${}^{\text{FHM}}\text{rHO}_2 + \text{O}(^3\text{P}) \rightarrow \text{O}(^3\text{P}) + {}^{\text{FHM}}\text{rOH} + \text{PTPFHMrOH}$                                          | tag_kG2106       | Sander et al. (2011) |
|        | UpStTrG  | $\text{HO}_2 + \text{O}_3 \rightarrow \text{LossO3H} + \text{LossO3} + \text{OH} + 2 \text{O}_2$                                                                              | tag_kG2107       |                      |
|        | tag: FHM | ${}^{\text{FHM}}\text{HO}_2 + \text{O}_3 \rightarrow \text{O}_3 + {}^{\text{FHM}}\text{OH} + \text{PTPFHMOH}$                                                                 | tag_kG2107       |                      |
| G2108a | tag: FHM | ${}^{\text{FHM}}\text{rHO}_2 + \text{O}_3 \rightarrow \text{O}_3 + {}^{\text{FHM}}\text{rOH} + \text{PTPFHMrOH}$                                                              | tag_kG2107       | Sander et al. (2011) |
|        | UpStG    | $\text{HO}_2 + \text{H} \rightarrow 2 \text{OH}$                                                                                                                              | tag_kG2108a      |                      |
|        | tag: FHM | ${}^{\text{FHM}}\text{HO}_2 + \text{H} \rightarrow \text{H} + {}^{\text{FHM}}\text{OH} + \text{PTPFHMOH}$                                                                     | tag_kG2108a      |                      |
|        | tag: FHM | ${}^{\text{FHM}}\text{rHO}_2 + \text{H} \rightarrow \text{H} + {}^{\text{FHM}}\text{rOH} + \text{PTPFHMrOH}$                                                                  | tag_kG2108a      |                      |
|        | tag: FHM | ${}^{\text{FHM}}\text{H} + \text{HO}_2 \rightarrow \text{HO}_2 + {}^{\text{FHM}}\text{OH} + \text{PTPFHMOH}$                                                                  | tag_kG2108a      |                      |
|        | tag: FHM | ${}^{\text{FHM}}\text{rH} + \text{HO}_2 \rightarrow \text{HO}_2 + {}^{\text{FHM}}\text{rOH} + \text{PTPFHMrOH}$                                                               | tag_kG2108a      |                      |
| G2108b | UpStG    | $\text{HO}_2 + \text{H} \rightarrow \text{H}_2 + \text{O}_2$                                                                                                                  | tag_kG2108b      | Sander et al. (2011) |
|        | tag: FHM | ${}^{\text{FHM}}\text{HO}_2 + \text{H} \rightarrow \text{H} + 0.5 {}^{\text{FHM}}\text{H}_2 + 0.5 \text{PTPFHMH}_2$                                                           | tag_kG2108b      |                      |
|        | tag: FHM | ${}^{\text{FHM}}\text{rHO}_2 + \text{H} \rightarrow \text{H} + 0.5 {}^{\text{FHM}}\text{rH}_2 + 0.5 \text{PTPFHMrH}_2$                                                        | tag_kG2108b      |                      |
|        | tag: FHM | ${}^{\text{FHM}}\text{H} + \text{HO}_2 \rightarrow \text{HO}_2 + 0.5 {}^{\text{FHM}}\text{H}_2 + 0.5 \text{PTPFHMH}_2$                                                        | tag_kG2108b      |                      |
|        | tag: FHM | ${}^{\text{FHM}}\text{rH} + \text{HO}_2 \rightarrow \text{HO}_2 + 0.5 {}^{\text{FHM}}\text{rH}_2 + 0.5 \text{PTPFHMrH}_2$                                                     | tag_kG2108b      |                      |
|        | UpStG    | $\text{HO}_2 + \text{H} \rightarrow \text{ProdO3H} + \text{ProdO3} + \text{O}(^3\text{P}) + \text{H}_2\text{O}$                                                               | tag_kG2108c      | Sander et al. (2011) |
| G2108c | tag: FHM | ${}^{\text{FHM}}\text{HO}_2 + \text{H} \rightarrow \text{H} + 0.5 {}^{\text{FHM}}\text{H}_2\text{O} + 0.5 \text{PTPFHMH}_2\text{O}$                                           | tag_kG2108c      |                      |
|        | tag: FHM | ${}^{\text{FHM}}\text{rHO}_2 + \text{H} \rightarrow \text{H} + 0.5 {}^{\text{FHM}}\text{rH}_2\text{O} + 0.5 \text{PTPFHMrH}_2\text{O}$                                        | tag_kG2108c      |                      |
|        | tag: FHM | ${}^{\text{FHM}}\text{H} + \text{HO}_2 \rightarrow \text{HO}_2 + 0.5 {}^{\text{FHM}}\text{H}_2\text{O} + 0.5 \text{PTPFHMH}_2\text{O}$                                        | tag_kG2108c      |                      |
|        | tag: FHM | ${}^{\text{FHM}}\text{rH} + \text{HO}_2 \rightarrow \text{HO}_2 + 0.5 {}^{\text{FHM}}\text{rH}_2\text{O} + 0.5 \text{PTPFHMrH}_2\text{O}$                                     | tag_kG2108c      |                      |
|        | UpStTrG  | $\text{HO}_2 + \text{OH} \rightarrow \text{H}_2\text{O} + \text{O}_2$                                                                                                         | tag_kG2109       |                      |
| G2109  | tag: FHM | ${}^{\text{FHM}}\text{HO}_2 + \text{OH} \rightarrow \text{OH} + 0.5 {}^{\text{FHM}}\text{H}_2\text{O} + 0.5 \text{PTPFHMH}_2\text{O}$                                         | tag_kG2109       | Sander et al. (2011) |
|        | tag: FHM | ${}^{\text{FHM}}\text{rHO}_2 + \text{OH} \rightarrow \text{OH} + 0.5 {}^{\text{FHM}}\text{rH}_2\text{O} + 0.5 \text{PTPFHMrH}_2\text{O}$                                      | tag_kG2109       |                      |
|        | tag: FHM | ${}^{\text{FHM}}\text{OH} + \text{HO}_2 \rightarrow \text{HO}_2 + 0.5 {}^{\text{FHM}}\text{H}_2\text{O} + 0.5 \text{PTPFHMH}_2\text{O} + \text{PTLFHMOH}$                     | tag_kG2109       |                      |
|        | tag: FHM | ${}^{\text{FHM}}\text{rOH} + \text{HO}_2 \rightarrow \text{HO}_2 + 0.5 {}^{\text{FHM}}\text{rH}_2\text{O} + 0.5 \text{PTPFHMrH}_2\text{O} + \text{PTLFHMrOH}$                 | tag_kG2109       |                      |
|        | UpStTrG  | $\text{HO}_2 + \text{HO}_2 \rightarrow \text{H}_2\text{O}_2 + \text{O}_2$                                                                                                     | tag_kG2110       |                      |
|        | tag: FHM | ${}^{\text{FHM}}\text{HO}_2 + \text{HO}_2 \rightarrow \text{HO}_2 + 0.5 {}^{\text{FHM}}\text{H}_2\text{O}_2$                                                                  | tag_kG2110*(2.0) |                      |
| G2111  | tag: FHM | ${}^{\text{FHM}}\text{rHO}_2 + \text{HO}_2 \rightarrow \text{HO}_2 + 0.5 {}^{\text{FHM}}\text{rH}_2\text{O}_2$                                                                | tag_kG2110*(2.0) | Sander et al. (2011) |
|        | UpStTrG  | $\text{H}_2\text{O} + \text{O}(^1\text{D}) \rightarrow \text{LossO3O} + \text{LossO3} + 2 \text{OH}$                                                                          | tag_kG2111       |                      |
|        | tag: FHM | ${}^{\text{FHM}}\text{H}_2\text{O} + \text{O}(^1\text{D}) \rightarrow \text{O}(^1\text{D}) + 2.0 {}^{\text{FHM}}\text{rOH} + 2.0 \text{PTPFHMrOH} + \text{PTLFHMH}_2\text{O}$ | tag_kG2111       |                      |

Table 1: Gas phase reactions (... continued)

| #      | labels    | reaction                                                                                                                                                                               | rate coefficient                                              | reference             |
|--------|-----------|----------------------------------------------------------------------------------------------------------------------------------------------------------------------------------------|---------------------------------------------------------------|-----------------------|
|        | tag: FHM  | ${}^{\text{FHM}}\text{H}_2\text{O} + \text{O}(^1\text{D}) \rightarrow \text{O}(^1\text{D}) + 2.0 {}^{\text{FHM}}\text{OH} + 2.0$<br>PTPFHMrOH + PTLFHM <sub>r</sub> H <sub>2</sub> O   | tag_kG2111                                                    |                       |
| G2112  | UpStTrG   | $\text{H}_2\text{O}_2 + \text{OH} \rightarrow \text{H}_2\text{O} + \text{HO}_2$                                                                                                        | tag_kG2112                                                    | Sander et al. (2011)  |
|        | transfer: | $\text{OH} \rightarrow 0.5 \text{H}_2\text{O}$                                                                                                                                         |                                                               |                       |
|        | tag: FHM  | $\text{H}_2\text{O}_2 + {}^{\text{FHM}}\text{OH} \rightarrow \text{H}_2\text{O}_2 + 0.5 {}^{\text{FHM}}\text{H}_2\text{O} + 0.5$<br>PTPFHMH <sub>2</sub> O + PTLFHMOH                  | tag_kG2112                                                    |                       |
|        | tag: FHM  | $\text{H}_2\text{O}_2 + {}^{\text{FHM}}\text{rOH} \rightarrow \text{H}_2\text{O}_2 + 0.5 {}^{\text{FHM}}\text{rH}_2\text{O} + 0.5$<br>PTPFHMrH <sub>2</sub> O + PTLFHM <sub>r</sub> OH | tag_kG2112                                                    |                       |
|        | transfer: | $\text{H}_2\text{O}_2 \rightarrow 0.5 \text{H}_2\text{O} + \text{HO}_2$                                                                                                                |                                                               |                       |
|        | tag: FHM  | $\text{OH} + {}^{\text{FHM}}\text{H}_2\text{O}_2 \rightarrow \text{OH} + 0.5 {}^{\text{FHM}}\text{H}_2\text{O} + 0.5$<br>PTPFHMH <sub>2</sub> O + ${}^{\text{FHM}}$ HO <sub>2</sub>    | tag_kG2112                                                    |                       |
|        | tag: FHM  | $\text{OH} + {}^{\text{FHM}}\text{rH}_2\text{O}_2 \rightarrow \text{OH} + 0.5 {}^{\text{FHM}}\text{rH}_2\text{O} + 0.5$<br>PTPFHMrH <sub>2</sub> O + ${}^{\text{FHM}}\text{rHO}_2$     | tag_kG2112                                                    |                       |
| G3100  | UpStGN    | $\text{N} + \text{O}_2 \rightarrow 1. \text{ProdO3N} + 1. \text{ProdO3} + \text{NO} + \text{O}(^3\text{P})$                                                                            | $1.5\text{E}-11*\text{EXP}(-3600./\text{temp})$               | Sander et al. (2011)  |
| G3101  | UpStTrGN  | $\text{N}_2 + \text{O}(^1\text{D}) \rightarrow \text{O}(^3\text{P}) + \text{N}_2$                                                                                                      | $2.15\text{E}-11*\text{EXP}(110./\text{temp})$                | Sander et al. (2011)  |
| G3102a | UpStGN    | $\text{N}_2\text{O} + \text{O}(^1\text{D}) \rightarrow 1. \text{LossO3O} + 1. \text{LossO3} + 2 \text{NO}$                                                                             | $7.25\text{E}-11*\text{EXP}(20./\text{temp})$                 | Sander et al. (2011)  |
| G3102b | StGN      | $\text{N}_2\text{O} + \text{O}(^1\text{D}) \rightarrow 1. \text{LossO3O} + 1. \text{LossO3} + \text{N}_2 + \text{O}_2$                                                                 | $4.63\text{E}-11*\text{EXP}(20./\text{temp})$                 | Sander et al. (2011)  |
| G3103  | UpStTrGN  | $\text{NO} + \text{O}_3 \rightarrow \text{NO}_2 + \text{O}_2$                                                                                                                          | $3.\text{E}-12*\text{EXP}(-1500./\text{temp})$                | Sander et al. (2011)  |
| G3104  | UpStGN    | $\text{NO} + \text{N} \rightarrow 1. \text{ProdO3N} + 1. \text{ProdO3} + \text{O}(^3\text{P}) + \text{N}_2$                                                                            | $2.1\text{E}-11*\text{EXP}(100./\text{temp})$                 | Sander et al. (2011)  |
| G3105  | UpStGN    | $\text{NO}_2 + \text{O}(^3\text{P}) \rightarrow 2. \text{LossO3N} + 2. \text{LossO3} + \text{NO} + \text{O}_2$                                                                         | $5.1\text{E}-12*\text{EXP}(210./\text{temp})$                 | Sander et al. (2011)  |
| G3106  | StTrGN    | $\text{NO}_2 + \text{O}_3 \rightarrow \text{NO}_3 + \text{O}_2$                                                                                                                        | $1.2\text{E}-13*\text{EXP}(-2450./\text{temp})$               | Sander et al. (2011)  |
| G3107  | UpStGN    | $\text{NO}_2 + \text{N} \rightarrow \text{N}_2\text{O} + \text{O}(^3\text{P})$                                                                                                         | $5.8\text{E}-12*\text{EXP}(220./\text{temp})$                 | Sander et al. (2011)  |
| G3108  | StTrGN    | $\text{NO}_3 + \text{NO} \rightarrow 2 \text{NO}_2$                                                                                                                                    | $1.5\text{E}-11*\text{EXP}(170./\text{temp})$                 | Sander et al. (2011)  |
| G3109  | UpStTrGN  | $\text{NO}_3 + \text{NO}_2 \rightarrow \text{N}_2\text{O}_5$                                                                                                                           | k_N03_N02                                                     | Sander et al. (2011)* |
| G3110  | StTrGN    | $\text{N}_2\text{O}_5 \rightarrow \text{NO}_2 + \text{NO}_3$                                                                                                                           | $k\_N03\_N02/(2.7\text{E}-27*\text{EXP}(11000./\text{temp}))$ | Sander et al. (2011)* |
| G3200  | TrGN      | $\text{NO} + \text{OH} \rightarrow \text{HONO}$                                                                                                                                        | tag_kG3200                                                    | Sander et al. (2011)  |
|        | tag: FHM  | ${}^{\text{FHM}}\text{OH} + \text{NO} \rightarrow \text{NO} + {}^{\text{FHM}}\text{HONO} + \text{PTLFHMOH}$                                                                            | tag_kG3200                                                    |                       |
|        | tag: FHM  | ${}^{\text{FHM}}\text{rOH} + \text{NO} \rightarrow \text{NO} + {}^{\text{FHM}}\text{rHONO} + \text{PTLFHM}_\text{r}\text{OH}$                                                          | tag_kG3200                                                    |                       |
| G3201  | UpStTrGN  | $\text{NO} + \text{HO}_2 \rightarrow \text{ProdO3N} + \text{ProdO3} + \text{NO}_2 + \text{OH}$                                                                                         | tag_kG3201                                                    | Sander et al. (2011)  |
|        | tag: FHM  | ${}^{\text{FHM}}\text{HO}_2 + \text{NO} \rightarrow \text{NO} + {}^{\text{FHM}}\text{OH} + \text{PTPFHMOH}$                                                                            | tag_kG3201                                                    |                       |
|        | tag: FHM  | ${}^{\text{FHM}}\text{rHO}_2 + \text{NO} \rightarrow \text{NO} + {}^{\text{FHM}}\text{rOH} + \text{PTPFHM}_\text{r}\text{OH}$                                                          | tag_kG3201                                                    |                       |
| G3202  | UpStTrGN  | $\text{NO}_2 + \text{OH} \rightarrow \text{HNO}_3$                                                                                                                                     | tag_kG3202                                                    | Sander et al. (2011)  |
|        | tag: FHM  | ${}^{\text{FHM}}\text{OH} + \text{NO}_2 \rightarrow \text{NO}_2 + {}^{\text{FHM}}\text{HNO}_3 + \text{PTLFHMOH}$                                                                       | tag_kG3202                                                    |                       |
|        | tag: FHM  | ${}^{\text{FHM}}\text{rOH} + \text{NO}_2 \rightarrow \text{NO}_2 + {}^{\text{FHM}}\text{rHNO}_3 + \text{PTLFHM}_\text{r}\text{OH}$                                                     | tag_kG3202                                                    |                       |

Table 1: Gas phase reactions (... continued)

| #     | labels   | reaction                                                                                                                                                       | rate coefficient | reference            |
|-------|----------|----------------------------------------------------------------------------------------------------------------------------------------------------------------|------------------|----------------------|
| G3203 | StTrGN   | $\text{NO}_2 + \text{HO}_2 \rightarrow \text{HNO}_4$                                                                                                           | tag_kG3203       | Sander et al. (2011) |
|       | tag: FHM | $^{\text{FHM}}\text{HO}_2 + \text{NO}_2 \rightarrow \text{NO}_2 + ^{\text{FHM}}\text{HNO}_4$                                                                   | tag_kG3203       |                      |
|       | tag: FHM | $^{\text{FHM}r}\text{HO}_2 + \text{NO}_2 \rightarrow \text{NO}_2 + ^{\text{FHM}r}\text{HNO}_4$                                                                 | tag_kG3203       |                      |
| G3204 | TrGN     | $\text{NO}_3 + \text{HO}_2 \rightarrow \text{LossO3N} + \text{LossO3} + \text{NO}_2 + \text{OH} + \text{O}_2$                                                  | tag_kG3204       | Sander et al. (2011) |
|       | tag: FHM | $^{\text{FHM}}\text{HO}_2 + \text{NO}_3 \rightarrow \text{NO}_3 + ^{\text{FHM}}\text{OH} + \text{PTPFHMOH}$                                                    | tag_kG3204       |                      |
|       | tag: FHM | $^{\text{FHM}r}\text{HO}_2 + \text{NO}_3 \rightarrow \text{NO}_3 + ^{\text{FHM}r}\text{OH} + \text{PTPFHMrOH}$                                                 | tag_kG3204       |                      |
| G3205 | TrGN     | $\text{HONO} + \text{OH} \rightarrow \text{ProdO3N} + \text{ProdO3} + \text{NO}_2 + \text{H}_2\text{O}$                                                        | tag_kG3205       | Sander et al. (2011) |
|       | tag: FHM | $^{\text{FHM}}\text{HONO} + \text{OH} \rightarrow \text{OH} + 0.5 ^{\text{FHM}}\text{H}_2\text{O} + 0.5$<br>$\text{PTPFHMH}_2\text{O}$                         | tag_kG3205       |                      |
|       | tag: FHM | $^{\text{FHM}r}\text{HONO} + \text{OH} \rightarrow \text{OH} + 0.5 ^{\text{FHM}r}\text{H}_2\text{O} + 0.5$<br>$\text{PTPFHMrH}_2\text{O}$                      | tag_kG3205       |                      |
|       | tag: FHM | $^{\text{FHM}}\text{OH} + \text{HONO} \rightarrow \text{HONO} + 0.5 ^{\text{FHM}}\text{H}_2\text{O} + 0.5$<br>$\text{PTPFHMH}_2\text{O} + \text{PTLFHMOH}$     | tag_kG3205       |                      |
|       | tag: FHM | $^{\text{FHM}r}\text{OH} + \text{HONO} \rightarrow \text{HONO} + 0.5 ^{\text{FHM}r}\text{H}_2\text{O} + 0.5$<br>$\text{PTPFHMrH}_2\text{O} + \text{PTLFHMrOH}$ | tag_kG3205       |                      |
|       | StTrGN   | $\text{HNO}_3 + \text{OH} \rightarrow \text{ProdO3N} + \text{ProdO3} + \text{H}_2\text{O} + \text{NO}_3$                                                       | tag_kG3206       |                      |
|       | tag: FHM | $^{\text{FHM}}\text{HNO}_3 + \text{OH} \rightarrow \text{OH} + 0.5 ^{\text{FHM}}\text{H}_2\text{O} + 0.5$<br>$\text{PTPFHMH}_2\text{O}$                        | tag_kG3206       |                      |
|       | tag: FHM | $^{\text{FHM}r}\text{HNO}_3 + \text{OH} \rightarrow \text{OH} + 0.5 ^{\text{FHM}r}\text{H}_2\text{O} + 0.5$<br>$\text{PTPFHMrH}_2\text{O}$                     | tag_kG3206       |                      |
|       | tag: FHM | $^{\text{FHM}}\text{OH} + \text{HNO}_3 \rightarrow \text{HNO}_3 + 0.5 ^{\text{FHM}}\text{H}_2\text{O} + 0.5$<br>$\text{PTPFHMH}_2\text{O} + \text{PTLFHMOH}$   | tag_kG3206       |                      |
| G3206 | StTrGN   | $\text{HNO}_3 + \text{OH} \rightarrow \text{ProdO3N} + \text{ProdO3} + \text{H}_2\text{O} + \text{NO}_3$                                                       | tag_kG3206       | Sander et al. (2011) |
|       | tag: FHM | $^{\text{FHM}}\text{HNO}_3 + \text{OH} \rightarrow \text{OH} + 0.5 ^{\text{FHM}}\text{H}_2\text{O} + 0.5$<br>$\text{PTPFHMH}_2\text{O}$                        | tag_kG3206       |                      |
|       | tag: FHM | $^{\text{FHM}r}\text{HNO}_3 + \text{OH} \rightarrow \text{OH} + 0.5 ^{\text{FHM}r}\text{H}_2\text{O} + 0.5$<br>$\text{PTPFHMrH}_2\text{O}$                     | tag_kG3206       |                      |
| G3207 | StTrGN   | $\text{HNO}_4 \rightarrow \text{NO}_2 + \text{HO}_2$                                                                                                           | tag_kG3207       | Sander et al. (2011) |
|       | tag: FHM | $^{\text{FHM}}\text{HNO}_4 \rightarrow ^{\text{FHM}}\text{HO}_2$                                                                                               | tag_kG3207       |                      |
|       | tag: FHM | $^{\text{FHM}r}\text{HNO}_4 \rightarrow ^{\text{FHM}r}\text{HO}_2$                                                                                             | tag_kG3207       |                      |
| G3208 | StTrGN   | $\text{HNO}_4 + \text{OH} \rightarrow \text{NO}_2 + \text{H}_2\text{O}$                                                                                        | tag_kG3208       | Sander et al. (2011) |
|       | tag: FHM | $^{\text{FHM}}\text{HNO}_4 + \text{OH} \rightarrow \text{OH} + 0.5 ^{\text{FHM}}\text{H}_2\text{O} + 0.5$<br>$\text{PTPFHMH}_2\text{O}$                        | tag_kG3208       |                      |
|       | tag: FHM | $^{\text{FHM}r}\text{HNO}_4 + \text{OH} \rightarrow \text{OH} + 0.5 ^{\text{FHM}r}\text{H}_2\text{O} + 0.5$<br>$\text{PTPFHMrH}_2\text{O}$                     | tag_kG3208       |                      |
|       | tag: FHM | $^{\text{FHM}}\text{OH} + \text{HNO}_4 \rightarrow \text{HNO}_4 + 0.5 ^{\text{FHM}}\text{H}_2\text{O} + 0.5$<br>$\text{PTPFHMH}_2\text{O} + \text{PTLFHMOH}$   | tag_kG3208       |                      |

Table 1: Gas phase reactions (... continued)

| #     | labels    | reaction                                                                                                                                                                       | rate coefficient | reference                 |
|-------|-----------|--------------------------------------------------------------------------------------------------------------------------------------------------------------------------------|------------------|---------------------------|
|       | tag: FHM  | ${}^{\text{FHM}}\text{rOH} + \text{HNO}_4 \rightarrow \text{HNO}_4 + 0.5 {}^{\text{FHM}}\text{rH}_2\text{O} + 0.5$<br>PTPFHMrH <sub>2</sub> O + PTLFHM <sub>r</sub> OH         | tag_kG3208       |                           |
| G3209 | TrGN      | $\text{NH}_3 + \text{OH} \rightarrow \text{NH}_2 + \text{H}_2\text{O}$                                                                                                         | tag_kG3209       | Kohlmann and Poppe (1999) |
|       | transfer: | $\text{NH}_3 \rightarrow \text{NH}_2 + 0.5 \text{H}_2\text{O}$                                                                                                                 |                  |                           |
|       | tag: FHM  | $\text{OH} + {}^{\text{FHM}}\text{NH}_3 \rightarrow \text{OH} + {}^{\text{FHM}}\text{NH}_2 + 0.5 {}^{\text{FHM}}\text{H}_2\text{O} + 0.5$<br>PTPFHMH <sub>2</sub> O            | tag_kG3209       |                           |
|       | tag: FHM  | $\text{OH} + {}^{\text{FHM}}\text{rNH}_3 \rightarrow \text{OH} + {}^{\text{FHM}}\text{rNH}_2 + 0.5 {}^{\text{FHM}}\text{rH}_2\text{O} + 0.5$<br>PTPFHMrH <sub>2</sub> O        | tag_kG3209       |                           |
|       | transfer: | $\text{OH} \rightarrow 0.5 \text{H}_2\text{O}$                                                                                                                                 |                  |                           |
|       | tag: FHM  | $\text{NH}_3 + {}^{\text{FHM}}\text{OH} \rightarrow \text{NH}_3 + 0.5 {}^{\text{FHM}}\text{H}_2\text{O} + 0.5$<br>PTPFHMH <sub>2</sub> O + PTLFHM <sub>r</sub> OH              | tag_kG3209       |                           |
|       | tag: FHM  | $\text{NH}_3 + {}^{\text{FHM}}\text{rOH} \rightarrow \text{NH}_3 + 0.5 {}^{\text{FHM}}\text{rH}_2\text{O} + 0.5$<br>PTPFHMrH <sub>2</sub> O + PTLFHM <sub>r</sub> OH           | tag_kG3209       |                           |
| G3210 | TrGN      | $\text{NH}_2 + \text{O}_3 \rightarrow \text{LossO3N} + \text{LossO3} + \text{NH}_2\text{O} + \text{O}_2$                                                                       | tag_kG3210       | Kohlmann and Poppe (1999) |
|       | tag: FHM  | ${}^{\text{FHM}}\text{NH}_2 + \text{O}_3 \rightarrow \text{O}_3 + {}^{\text{FHM}}\text{NH}_2\text{O}$                                                                          | tag_kG3210       |                           |
|       | tag: FHM  | ${}^{\text{FHM}}\text{rNH}_2 + \text{O}_3 \rightarrow \text{O}_3 + {}^{\text{FHM}}\text{rNH}_2\text{O}$                                                                        | tag_kG3210       |                           |
| G3211 | TrGN      | $\text{NH}_2 + \text{HO}_2 \rightarrow \text{NH}_2\text{O} + \text{OH}$                                                                                                        | tag_kG3211       | Kohlmann and Poppe (1999) |
|       | transfer: | $\text{NH}_2 \rightarrow \text{NH}_2\text{O}$                                                                                                                                  |                  |                           |
|       | tag: FHM  | $\text{HO}_2 + {}^{\text{FHM}}\text{NH}_2 \rightarrow \text{HO}_2 + {}^{\text{FHM}}\text{NH}_2\text{O}$                                                                        | tag_kG3211       |                           |
|       | tag: FHM  | $\text{HO}_2 + {}^{\text{FHM}}\text{rNH}_2 \rightarrow \text{HO}_2 + {}^{\text{FHM}}\text{rNH}_2\text{O}$                                                                      | tag_kG3211       |                           |
|       | transfer: | $\text{HO}_2 \rightarrow \text{OH}$                                                                                                                                            |                  |                           |
|       | tag: FHM  | $\text{NH}_2 + {}^{\text{FHM}}\text{HO}_2 \rightarrow \text{NH}_2 + {}^{\text{FHM}}\text{OH} + \text{PTPFHMOH}$                                                                | tag_kG3211       |                           |
|       | tag: FHM  | $\text{NH}_2 + {}^{\text{FHM}}\text{rHO}_2 \rightarrow \text{NH}_2 + {}^{\text{FHM}}\text{rOH} + \text{PTPFHMrOH}$                                                             | tag_kG3211       |                           |
| G3212 | TrGN      | $\text{NH}_2 + \text{HO}_2 \rightarrow \text{HNO} + \text{H}_2\text{O}$                                                                                                        | tag_kG3212       | Kohlmann and Poppe (1999) |
|       | transfer: | $\text{NH}_2 \rightarrow \text{HNO} + 0.5 \text{H}_2\text{O}$                                                                                                                  |                  |                           |
|       | tag: FHM  | $\text{HO}_2 + {}^{\text{FHM}}\text{NH}_2 \rightarrow \text{HO}_2 + {}^{\text{FHM}}\text{HNO} + 0.5 {}^{\text{FHM}}\text{H}_2\text{O} + 0.5$<br>PTPFHMH <sub>2</sub> O         | tag_kG3212       |                           |
|       | tag: FHM  | $\text{HO}_2 + {}^{\text{FHM}}\text{rNH}_2 \rightarrow \text{HO}_2 + {}^{\text{FHM}}\text{rHNO} + 0.5 {}^{\text{FHM}}\text{rH}_2\text{O} +$<br>$0.5 \text{PTPFHMrH}_2\text{O}$ | tag_kG3212       |                           |
|       | transfer: | $\text{HO}_2 \rightarrow 0.5 \text{H}_2\text{O}$                                                                                                                               |                  |                           |
|       | tag: FHM  | $\text{NH}_2 + {}^{\text{FHM}}\text{HO}_2 \rightarrow \text{NH}_2 + 0.5 {}^{\text{FHM}}\text{H}_2\text{O} + 0.5$<br>PTPFHMH <sub>2</sub> O                                     | tag_kG3212       |                           |
|       | tag: FHM  | $\text{NH}_2 + {}^{\text{FHM}}\text{rHO}_2 \rightarrow \text{NH}_2 + 0.5 {}^{\text{FHM}}\text{rH}_2\text{O} + 0.5$<br>PTPFHMrH <sub>2</sub> O                                  | tag_kG3212       |                           |
| G3213 | TrGN      | $\text{NH}_2 + \text{NO} \rightarrow \text{HO}_2 + \text{OH} + \text{N}_2$                                                                                                     | tag_kG3213       | Kohlmann and Poppe (1999) |

Table 1: Gas phase reactions (... continued)

| #     | labels   | reaction                                                                                                                                                    | rate coefficient | reference                 |
|-------|----------|-------------------------------------------------------------------------------------------------------------------------------------------------------------|------------------|---------------------------|
|       | tag: FHM | ${}^{\text{FHM}}\text{NH}_2 + \text{NO} \rightarrow \text{NO} + {}^{\text{FHM}}\text{HO}_2 + {}^{\text{FHM}}\text{OH} + \text{PTPFHMOH}$                    | tag_kG3213       |                           |
|       | tag: FHM | ${}^{\text{FHM}}\text{rNH}_2 + \text{NO} \rightarrow \text{NO} + {}^{\text{FHM}}\text{rHO}_2 + {}^{\text{FHM}}\text{rOH} + \text{PTPFHMrOH}$                | tag_kG3213       |                           |
| G3214 | TrGN     | $\text{NH}_2 + \text{NO} \rightarrow \text{N}_2 + \text{H}_2\text{O}$                                                                                       | tag_kG3214       | Kohlmann and Poppe (1999) |
|       | tag: FHM | ${}^{\text{FHM}}\text{NH}_2 + \text{NO} \rightarrow \text{NO} + {}^{\text{FHM}}\text{H}_2\text{O} + \text{PTPFHMH}_2\text{O}$                               | tag_kG3214       |                           |
|       | tag: FHM | ${}^{\text{FHM}}\text{rNH}_2 + \text{NO} \rightarrow \text{NO} + {}^{\text{FHM}}\text{rH}_2\text{O} + \text{PTPFHMrH}_2\text{O}$                            | tag_kG3214       |                           |
| G3215 | TrGN     | $\text{NH}_2 + \text{NO}_2 \rightarrow \text{LossO3N} + \text{LossO3} + \text{N}_2\text{O} + \text{H}_2\text{O}$                                            | tag_kG3215       | Kohlmann and Poppe (1999) |
|       | tag: FHM | ${}^{\text{FHM}}\text{NH}_2 + \text{NO}_2 \rightarrow \text{NO}_2 + {}^{\text{FHM}}\text{H}_2\text{O} + \text{PTPFHMH}_2\text{O}$                           | tag_kG3215       |                           |
|       | tag: FHM | ${}^{\text{FHM}}\text{rNH}_2 + \text{NO}_2 \rightarrow \text{NO}_2 + {}^{\text{FHM}}\text{rH}_2\text{O} + \text{PTPFHMrH}_2\text{O}$                        | tag_kG3215       |                           |
| G3216 | TrGN     | $\text{NH}_2 + \text{NO}_2 \rightarrow \text{LossO3N} + \text{LossO3} + \text{NH}_2\text{O} + \text{NO}$                                                    | tag_kG3216       | Kohlmann and Poppe (1999) |
|       | tag: FHM | ${}^{\text{FHM}}\text{NH}_2 + \text{NO}_2 \rightarrow \text{NO}_2 + {}^{\text{FHM}}\text{NH}_2\text{O}$                                                     | tag_kG3216       |                           |
|       | tag: FHM | ${}^{\text{FHM}}\text{rNH}_2 + \text{NO}_2 \rightarrow \text{NO}_2 + {}^{\text{FHM}}\text{rNH}_2\text{O}$                                                   | tag_kG3216       |                           |
| G3217 | TrGN     | $\text{NH}_2\text{O} + \text{O}_3 \rightarrow \text{LossO3N} + \text{LossO3} + \text{NH}_2 + \text{O}_2$                                                    | tag_kG3217       | Kohlmann and Poppe (1999) |
|       | tag: FHM | ${}^{\text{FHM}}\text{NH}_2\text{O} + \text{O}_3 \rightarrow \text{O}_3 + {}^{\text{FHM}}\text{NH}_2$                                                       | tag_kG3217       |                           |
|       | tag: FHM | ${}^{\text{FHM}}\text{rNH}_2\text{O} + \text{O}_3 \rightarrow \text{O}_3 + {}^{\text{FHM}}\text{rNH}_2$                                                     | tag_kG3217       |                           |
| G3218 | TrGN     | $\text{NH}_2\text{O} \rightarrow \text{NHOH}$                                                                                                               | tag_kG3218       | Kohlmann and Poppe (1999) |
|       | tag: FHM | ${}^{\text{FHM}}\text{NH}_2\text{O} \rightarrow {}^{\text{FHM}}\text{NHOH}$                                                                                 | tag_kG3218       |                           |
|       | tag: FHM | ${}^{\text{FHM}}\text{rNH}_2\text{O} \rightarrow {}^{\text{FHM}}\text{rNHOH}$                                                                               | tag_kG3218       |                           |
| G3219 | TrGN     | $\text{HNO} + \text{OH} \rightarrow \text{NO} + \text{H}_2\text{O}$                                                                                         | tag_kG3219       | Kohlmann and Poppe (1999) |
|       | tag: FHM | ${}^{\text{FHM}}\text{HNO} + \text{OH} \rightarrow \text{OH} + 0.5 {}^{\text{FHM}}\text{H}_2\text{O} + 0.5 \text{PTPFHMH}_2\text{O}$                        | tag_kG3219       |                           |
|       | tag: FHM | ${}^{\text{FHM}}\text{rHNO} + \text{OH} \rightarrow \text{OH} + 0.5 {}^{\text{FHM}}\text{rH}_2\text{O} + 0.5 \text{PTPFHMrH}_2\text{O}$                     | tag_kG3219       |                           |
|       | tag: FHM | ${}^{\text{FHM}}\text{OH} + \text{HNO} \rightarrow \text{HNO} + 0.5 {}^{\text{FHM}}\text{H}_2\text{O} + 0.5 \text{PTPFHMH}_2\text{O} + \text{PTLFHMOH}$     | tag_kG3219       |                           |
|       | tag: FHM | ${}^{\text{FHM}}\text{rOH} + \text{HNO} \rightarrow \text{HNO} + 0.5 {}^{\text{FHM}}\text{rH}_2\text{O} + 0.5 \text{PTPFHMrH}_2\text{O} + \text{PTLFHMrOH}$ | tag_kG3219       |                           |
| G3220 | TrGN     | $\text{HNO} + \text{NHOH} \rightarrow \text{NH}_2\text{OH} + \text{NO}$                                                                                     | tag_kG3220       | Kohlmann and Poppe (1999) |
|       | tag: FHM | ${}^{\text{FHM}}\text{HNO} + \text{NHOH} \rightarrow \text{NHOH} + 0.3333333 {}^{\text{FHM}}\text{NH}_2\text{OH}$                                           | tag_kG3220       |                           |
|       | tag: FHM | ${}^{\text{FHM}}\text{rHNO} + \text{NHOH} \rightarrow \text{NHOH} + 0.3333333 {}^{\text{FHM}}\text{rNH}_2\text{OH}$                                         | tag_kG3220       |                           |
|       | tag: FHM | ${}^{\text{FHM}}\text{NHOH} + \text{HNO} \rightarrow \text{HNO} + 0.6666667 {}^{\text{FHM}}\text{NH}_2\text{OH}$                                            | tag_kG3220       |                           |
|       | tag: FHM | ${}^{\text{FHM}}\text{rNHOH} + \text{HNO} \rightarrow \text{HNO} + 0.6666667 {}^{\text{FHM}}\text{rNH}_2\text{OH}$                                          | tag_kG3220       |                           |
| G3221 | TrGN     | $\text{HNO} + \text{NO}_2 \rightarrow \text{LossO3N} + \text{LossO3} + \text{HONO} + \text{NO}$                                                             | tag_kG3221       | Kohlmann and Poppe (1999) |
|       | tag: FHM | ${}^{\text{FHM}}\text{HNO} + \text{NO}_2 \rightarrow \text{NO}_2 + {}^{\text{FHM}}\text{HONO}$                                                              | tag_kG3221       |                           |
|       | tag: FHM | ${}^{\text{FHM}}\text{rHNO} + \text{NO}_2 \rightarrow \text{NO}_2 + {}^{\text{FHM}}\text{rHONO}$                                                            | tag_kG3221       |                           |

Table 1: Gas phase reactions (... continued)

| #     | labels    | reaction                                                                                                                                                                                                                                                                                                                                                                             | rate coefficient | reference                 |
|-------|-----------|--------------------------------------------------------------------------------------------------------------------------------------------------------------------------------------------------------------------------------------------------------------------------------------------------------------------------------------------------------------------------------------|------------------|---------------------------|
| G3222 | TrGN      | $\text{NHOH} + \text{OH} \rightarrow \text{HNO} + \text{H}_2\text{O}$                                                                                                                                                                                                                                                                                                                | tag_kG3222       | Kohlmann and Poppe (1999) |
|       | transfer: | $\text{NHOH} \rightarrow \text{HNO} + 0.5 \text{H}_2\text{O}$                                                                                                                                                                                                                                                                                                                        |                  |                           |
|       | tag: FHM  | $\text{OH} + {}^{\text{FHM}}\text{NHOH} \rightarrow \text{OH} + {}^{\text{FHM}}\text{HNO} + 0.5 {}^{\text{FHM}}\text{H}_2\text{O} + 0.5 \text{PTPFHMH}_2\text{O}$                                                                                                                                                                                                                    | tag_kG3222       |                           |
|       | tag: FHM  | $\text{OH} + {}^{\text{FHM}_r}\text{NHOH} \rightarrow \text{OH} + {}^{\text{FHM}_r}\text{HNO} + 0.5 {}^{\text{FHM}_r}\text{H}_2\text{O} + 0.5 \text{PTPFHMrH}_2\text{O}$                                                                                                                                                                                                             | tag_kG3222       |                           |
|       | transfer: | $\text{OH} \rightarrow 0.5 \text{H}_2\text{O}$                                                                                                                                                                                                                                                                                                                                       |                  |                           |
|       | tag: FHM  | $\text{NHOH} + {}^{\text{FHM}}\text{OH} \rightarrow \text{NHOH} + 0.5 {}^{\text{FHM}}\text{H}_2\text{O} + 0.5 \text{PTPFHMH}_2\text{O} + \text{PTLFHMOH}$                                                                                                                                                                                                                            | tag_kG3222       |                           |
|       | tag: FHM  | $\text{NHOH} + {}^{\text{FHM}_r}\text{OH} \rightarrow \text{NHOH} + 0.5 {}^{\text{FHM}_r}\text{H}_2\text{O} + 0.5 \text{PTPFHMrH}_2\text{O} + \text{PTLFHMrOH}$                                                                                                                                                                                                                      | tag_kG3222       |                           |
|       |           |                                                                                                                                                                                                                                                                                                                                                                                      |                  |                           |
| G3223 | TrGN      | $\text{NH}_2\text{OH} + \text{OH} \rightarrow \text{NHOH} + \text{H}_2\text{O}$                                                                                                                                                                                                                                                                                                      | tag_kG3223       | Kohlmann and Poppe (1999) |
|       | transfer: | $\text{NH}_2\text{OH} \rightarrow \text{NHOH} + 0.5 \text{H}_2\text{O}$                                                                                                                                                                                                                                                                                                              |                  |                           |
|       | tag: FHM  | $\text{OH} + {}^{\text{FHM}}\text{NH}_2\text{OH} \rightarrow \text{OH} + {}^{\text{FHM}}\text{NHOH} + 0.5 {}^{\text{FHM}}\text{H}_2\text{O} + 0.5 \text{PTPFHMH}_2\text{O}$                                                                                                                                                                                                          | tag_kG3223       |                           |
|       | tag: FHM  | $\text{OH} + {}^{\text{FHM}_r}\text{NH}_2\text{OH} \rightarrow \text{OH} + {}^{\text{FHM}_r}\text{NHOH} + 0.5 {}^{\text{FHM}_r}\text{H}_2\text{O} + 0.5 \text{PTPFHMrH}_2\text{O}$                                                                                                                                                                                                   | tag_kG3223       |                           |
|       | transfer: | $\text{OH} \rightarrow 0.5 \text{H}_2\text{O}$                                                                                                                                                                                                                                                                                                                                       |                  |                           |
|       | tag: FHM  | $\text{NH}_2\text{OH} + {}^{\text{FHM}}\text{OH} \rightarrow \text{NH}_2\text{OH} + 0.5 {}^{\text{FHM}}\text{H}_2\text{O} + 0.5 \text{PTPFHMH}_2\text{O} + \text{PTLFHMOH}$                                                                                                                                                                                                          | tag_kG3223       |                           |
|       | tag: FHM  | $\text{NH}_2\text{OH} + {}^{\text{FHM}_r}\text{OH} \rightarrow \text{NH}_2\text{OH} + 0.5 {}^{\text{FHM}_r}\text{H}_2\text{O} + 0.5 \text{PTPFHMrH}_2\text{O} + \text{PTLFHMrOH}$                                                                                                                                                                                                    | tag_kG3223       |                           |
|       |           |                                                                                                                                                                                                                                                                                                                                                                                      |                  |                           |
| G3224 | TrGN      | $\text{HNO} + \text{O}_2 \rightarrow \text{HO}_2 + \text{NO}$                                                                                                                                                                                                                                                                                                                        | tag_kG3224       | Kohlmann and Poppe (1999) |
|       | tag: FHM  | ${}^{\text{FHM}}\text{HNO} + \text{O}_2 \rightarrow \text{O}_2 + {}^{\text{FHM}}\text{HO}_2$                                                                                                                                                                                                                                                                                         | tag_kG3224       |                           |
|       | tag: FHM  | ${}^{\text{FHM}_r}\text{HNO} + \text{O}_2 \rightarrow \text{O}_2 + {}^{\text{FHM}_r}\text{HO}_2$                                                                                                                                                                                                                                                                                     | tag_kG3224       |                           |
| G4100 | UpStG     | $\text{CH}_4 + \text{O}(^1\text{D}) \rightarrow \text{LossO3C} + \text{LossO3} + 0.75 \text{CH}_3 + 0.75 \text{OH} + 0.2 \text{CH}_3\text{O} + 0.2 \text{H} + 0.05 \text{HCHO} + 0.05 \text{H}_2$                                                                                                                                                                                    | tag_kG4100       | Sander et al. (2011)      |
|       | tag: FHM  | ${}^{\text{FHM}}\text{CH}_4 + \text{O}(^1\text{D}) \rightarrow \text{O}(^1\text{D}) + 0.75 {}^{\text{FHM}}\text{CH}_3 + 0.75 {}^{\text{FHM}}\text{OH} + 0.75 \text{PTPFHMOH} + 0.2 {}^{\text{FHM}}\text{CH}_3\text{O} + 0.2 {}^{\text{FHM}}\text{H} + 0.05 {}^{\text{FHM}}\text{HCHO} + 0.05 {}^{\text{FHM}}\text{H}_2 + 0.05 \text{PTPFHMH}_2 + \text{PTLFHMC}_4\text{H}_4$         | tag_kG4100       |                           |
|       | tag: FHM  | ${}^{\text{FHM}_r}\text{CH}_4 + \text{O}(^1\text{D}) \rightarrow \text{O}(^1\text{D}) + 0.75 {}^{\text{FHM}_r}\text{CH}_3 + 0.75 {}^{\text{FHM}_r}\text{OH} + 0.75 \text{PTPFHMrOH} + 0.2 {}^{\text{FHM}_r}\text{CH}_3\text{O} + 0.2 {}^{\text{FHM}_r}\text{H} + 0.05 {}^{\text{FHM}_r}\text{HCHO} + 0.05 {}^{\text{FHM}_r}\text{H}_2 + 0.05 \text{PTPFHMrH}_2 + \text{PTLFHMrCH}_4$ | tag_kG4100       |                           |
|       |           |                                                                                                                                                                                                                                                                                                                                                                                      |                  |                           |



Table 1: Gas phase reactions (... continued)

| #      | labels    | reaction                                                                                                                                                                                                                                                                          | rate coefficient | reference              |
|--------|-----------|-----------------------------------------------------------------------------------------------------------------------------------------------------------------------------------------------------------------------------------------------------------------------------------|------------------|------------------------|
| G4101  | StTrG     | $\text{CH}_4 + \text{OH} \rightarrow \text{CH}_3 + \text{H}_2\text{O}$                                                                                                                                                                                                            | tag_kG4101       | Atkinson (2003)        |
|        | transfer: | $\text{CH}_4 \rightarrow \text{CH}_3 + 0.5 \text{H}_2\text{O} + \text{CH}_3\text{O}_2$                                                                                                                                                                                            |                  |                        |
|        | tag: FHM  | $\text{OH} + {}^{\text{FHM}}\text{CH}_4 \rightarrow \text{OH} + {}^{\text{FHM}}\text{CH}_3 + 0.5 {}^{\text{FHM}}\text{H}_2\text{O} + 0.5$<br>$\text{PTPFHMH}_2\text{O} + \text{PTLFHMCH}_4$                                                                                       | tag_kG4101       |                        |
|        | tag: FHM  | $\text{OH} + {}^{\text{FHM}_r}\text{CH}_4 \rightarrow \text{OH} + {}^{\text{FHM}_r}\text{CH}_3 + 0.5 {}^{\text{FHM}_r}\text{H}_2\text{O} + 0.5$<br>$\text{PTPFHMrH}_2\text{O} + \text{PTLFHMrCH}_4$                                                                               | tag_kG4101       |                        |
|        | transfer: | $\text{OH} \rightarrow 0.5 \text{H}_2\text{O}$                                                                                                                                                                                                                                    |                  |                        |
|        | tag: FHM  | $\text{CH}_4 + {}^{\text{FHM}}\text{OH} \rightarrow \text{CH}_4 + 0.5 {}^{\text{FHM}}\text{H}_2\text{O} + 0.5$<br>$\text{PTPFHMH}_2\text{O} + \text{PTLFHMOH}$                                                                                                                    | tag_kG4101       |                        |
|        | tag: FHM  | $\text{CH}_4 + {}^{\text{FHM}_r}\text{OH} \rightarrow \text{CH}_4 + 0.5 {}^{\text{FHM}_r}\text{H}_2\text{O} + 0.5$<br>$\text{PTPFHMrH}_2\text{O} + \text{PTLFHMrOH}$                                                                                                              | tag_kG4101       |                        |
| G4102  | TrG       | $\text{CH}_3\text{OH} + \text{OH} \rightarrow 0.85 \text{HCHO} + 0.85 \text{HO}_2 + 0.15 \text{CH}_3\text{O}$<br>$+ \text{H}_2\text{O}$                                                                                                                                           | tag_kG4102       | Atkinson et al. (2006) |
|        | transfer: | $\text{CH}_3\text{OH} \rightarrow \text{HCHO} + \text{HO}_2 + \text{CH}_3\text{O} + 0.5 \text{H}_2\text{O} + \text{CH}_3\text{O}_2$                                                                                                                                               |                  |                        |
|        | tag: FHM  | $\text{OH} + {}^{\text{FHM}}\text{CH}_3\text{OH} \rightarrow \text{OH} + 0.85 {}^{\text{FHM}}\text{HCHO} + 0.85$<br>${}^{\text{FHM}}\text{HO}_2 + 0.15 {}^{\text{FHM}}\text{CH}_3\text{O} + 0.5 {}^{\text{FHM}}\text{H}_2\text{O} + 0.5$<br>$\text{PTPFHMH}_2\text{O}$            | tag_kG4102       |                        |
|        | tag: FHM  | $\text{OH} + {}^{\text{FHM}_r}\text{CH}_3\text{OH} \rightarrow \text{OH} + 0.85 {}^{\text{FHM}_r}\text{HCHO} + 0.85$<br>${}^{\text{FHM}_r}\text{HO}_2 + 0.15 {}^{\text{FHM}_r}\text{CH}_3\text{O} + 0.5 {}^{\text{FHM}_r}\text{H}_2\text{O} + 0.5$<br>$\text{PTPFHMrH}_2\text{O}$ | tag_kG4102       |                        |
|        | transfer: | $\text{OH} \rightarrow 0.5 \text{H}_2\text{O}$                                                                                                                                                                                                                                    |                  |                        |
|        | tag: FHM  | $\text{CH}_3\text{OH} + {}^{\text{FHM}}\text{OH} \rightarrow \text{CH}_3\text{OH} + 0.5 {}^{\text{FHM}}\text{H}_2\text{O} + 0.5$<br>$\text{PTPFHMH}_2\text{O} + \text{PTLFHMOH}$                                                                                                  | tag_kG4102       |                        |
|        | tag: FHM  | $\text{CH}_3\text{OH} + {}^{\text{FHM}_r}\text{OH} \rightarrow \text{CH}_3\text{OH} + 0.5 {}^{\text{FHM}_r}\text{H}_2\text{O} + 0.5$<br>$\text{PTPFHMrH}_2\text{O} + \text{PTLFHMrOH}$                                                                                            | tag_kG4102       |                        |
| G4103a | StTrG     | $\text{CH}_3\text{O}_2 + \text{HO}_2 \rightarrow \text{CH}_3\text{OOH} + \text{O}_2$                                                                                                                                                                                              | tag_kG4103a      | Atkinson et al. (2006) |
|        | tag: FHM  | ${}^{\text{FHM}}\text{CH}_3\text{O}_2 + \text{HO}_2 \rightarrow \text{HO}_2 + 0.75 {}^{\text{FHM}}\text{CH}_3\text{OOH}$                                                                                                                                                          | tag_kG4103a      |                        |
|        | tag: FHM  | ${}^{\text{FHM}_r}\text{CH}_3\text{O}_2 + \text{HO}_2 \rightarrow \text{HO}_2 + 0.75 {}^{\text{FHM}_r}\text{CH}_3\text{OOH}$                                                                                                                                                      | tag_kG4103a      |                        |
|        | tag: FHM  | ${}^{\text{FHM}}\text{HO}_2 + \text{CH}_3\text{O}_2 \rightarrow \text{CH}_3\text{O}_2 + 0.25 {}^{\text{FHM}}\text{CH}_3\text{OOH}$                                                                                                                                                | tag_kG4103a      |                        |
|        | tag: FHM  | ${}^{\text{FHM}_r}\text{HO}_2 + \text{CH}_3\text{O}_2 \rightarrow \text{CH}_3\text{O}_2 + 0.25 {}^{\text{FHM}_r}\text{CH}_3\text{OOH}$                                                                                                                                            | tag_kG4103a      |                        |
| G4103b | StTrG     | $\text{CH}_3\text{O}_2 + \text{HO}_2 \rightarrow \text{HCHO} + \text{H}_2\text{O} + \text{O}_2$                                                                                                                                                                                   | tag_kG4103b      | Atkinson et al. (2006) |
|        | transfer: | $\text{CH}_3\text{O}_2 \rightarrow 0.5 \text{H}_2\text{O} + \text{HCHO}$                                                                                                                                                                                                          |                  |                        |
|        | tag: FHM  | $\text{HO}_2 + {}^{\text{FHM}}\text{CH}_3\text{O}_2 \rightarrow \text{HO}_2 + {}^{\text{FHM}}\text{HCHO} + 0.5 {}^{\text{FHM}}\text{H}_2\text{O}$<br>$+ 0.5 \text{PTPFHMH}_2\text{O}$                                                                                             | tag_kG4103b      |                        |

Table 1: Gas phase reactions (... continued)

| #      | labels    | reaction                                                                                                                                                                                                                                                                           | rate coefficient | reference                    |
|--------|-----------|------------------------------------------------------------------------------------------------------------------------------------------------------------------------------------------------------------------------------------------------------------------------------------|------------------|------------------------------|
|        | tag: FHM  | $\text{HO}_2 + {}^{\text{FHM}}\text{CH}_3\text{O}_2 \rightarrow \text{HO}_2 + {}^{\text{FHM}}\text{HCHO} + 0.5 {}^{\text{FHM}}\text{H}_2\text{O} + 0.5 \text{PTPFHMrH}_2\text{O}$                                                                                                  | tag_kG4103b      |                              |
|        | transfer: | $\text{HO}_2 \rightarrow 0.5 \text{H}_2\text{O}$                                                                                                                                                                                                                                   |                  |                              |
|        | tag: FHM  | $\text{CH}_3\text{O}_2 + {}^{\text{FHM}}\text{HO}_2 \rightarrow \text{CH}_3\text{O}_2 + 0.5 {}^{\text{FHM}}\text{H}_2\text{O} + 0.5 \text{PTPFHMrH}_2\text{O}$                                                                                                                     | tag_kG4103b      |                              |
|        | tag: FHM  | $\text{CH}_3\text{O}_2 + {}^{\text{FHM}}\text{HO}_2 \rightarrow \text{CH}_3\text{O}_2 + 0.5 {}^{\text{FHM}}\text{H}_2\text{O} + 0.5 \text{PTPFHMrH}_2\text{O}$                                                                                                                     | tag_kG4103b      |                              |
| G4104a | StTrGN    | $\text{CH}_3\text{O}_2 + \text{NO} \rightarrow \text{ProdO3C} + \text{ProdO3} + \text{CH}_3\text{O} + \text{NO}_2$                                                                                                                                                                 | tag_kG4104a      | Atkinson et al. (2006), ?, ? |
|        | tag: FHM  | ${}^{\text{FHM}}\text{CH}_3\text{O}_2 + \text{NO} \rightarrow \text{NO} + {}^{\text{FHM}}\text{CH}_3\text{O}$                                                                                                                                                                      | tag_kG4104a      |                              |
|        | tag: FHM  | ${}^{\text{FHM}}\text{CH}_3\text{O}_2 + \text{NO} \rightarrow \text{NO} + {}^{\text{FHM}}\text{CH}_3\text{O}$                                                                                                                                                                      | tag_kG4104a      |                              |
| G4104b | StTrGN    | $\text{CH}_3\text{O}_2 + \text{NO} \rightarrow \text{CH}_3\text{ONO}_2$                                                                                                                                                                                                            | tag_kG4104b      | Atkinson et al. (2006), ?, ? |
|        | tag: FHM  | ${}^{\text{FHM}}\text{CH}_3\text{O}_2 + \text{NO} \rightarrow \text{NO} + {}^{\text{FHM}}\text{CH}_3\text{ONO}_2$                                                                                                                                                                  | tag_kG4104b      |                              |
|        | tag: FHM  | ${}^{\text{FHM}}\text{CH}_3\text{O}_2 + \text{NO} \rightarrow \text{NO} + {}^{\text{FHM}}\text{CH}_3\text{ONO}_2$                                                                                                                                                                  | tag_kG4104b      |                              |
| G4105  | TrGN      | $\text{CH}_3\text{O}_2 + \text{NO}_3 \rightarrow \text{LossO3C} + \text{LossO3} + \text{CH}_3\text{O} + \text{NO}_2 + \text{O}_2$                                                                                                                                                  | tag_kG4105       | Atkinson et al. (2006)       |
|        | tag: FHM  | ${}^{\text{FHM}}\text{CH}_3\text{O}_2 + \text{NO}_3 \rightarrow \text{NO}_3 + {}^{\text{FHM}}\text{CH}_3\text{O}$                                                                                                                                                                  | tag_kG4105       |                              |
|        | tag: FHM  | ${}^{\text{FHM}}\text{CH}_3\text{O}_2 + \text{NO}_3 \rightarrow \text{NO}_3 + {}^{\text{FHM}}\text{CH}_3\text{O}$                                                                                                                                                                  | tag_kG4105       |                              |
| G4106a | StTrG     | $\text{CH}_3\text{O}_2 \rightarrow \text{CH}_3\text{O} + 0.5 \text{O}_2$                                                                                                                                                                                                           | tag_kG4106a      | Atkinson et al. (2006)       |
|        | tag: FHM  | ${}^{\text{FHM}}\text{CH}_3\text{O}_2 \rightarrow {}^{\text{FHM}}\text{CH}_3\text{O}$                                                                                                                                                                                              | tag_kG4106a      |                              |
|        | tag: FHM  | ${}^{\text{FHM}}\text{CH}_3\text{O}_2 \rightarrow {}^{\text{FHM}}\text{CH}_3\text{O}$                                                                                                                                                                                              | tag_kG4106a      |                              |
| G4106b | StTrG     | $\text{CH}_3\text{O}_2 \rightarrow 0.5 \text{HCHO} + 0.5 \text{CH}_3\text{OH} + 0.5 \text{O}_2$                                                                                                                                                                                    | tag_kG4106b      | Atkinson et al. (2006)       |
|        | tag: FHM  | ${}^{\text{FHM}}\text{CH}_3\text{O}_2 \rightarrow 0.5 {}^{\text{FHM}}\text{HCHO} + 0.5 {}^{\text{FHM}}\text{CH}_3\text{OH}$                                                                                                                                                        | tag_kG4106b      |                              |
|        | tag: FHM  | ${}^{\text{FHM}}\text{CH}_3\text{O}_2 \rightarrow 0.5 {}^{\text{FHM}}\text{HCHO} + 0.5 {}^{\text{FHM}}\text{CH}_3\text{OH}$                                                                                                                                                        | tag_kG4106b      |                              |
| G4107  | StTrG     | $\text{CH}_3\text{OOH} + \text{OH} \rightarrow 0.6 \text{CH}_3\text{O}_2 + 0.4 \text{HCHO} + 0.4 \text{OH} + \text{H}_2\text{O}$                                                                                                                                                   | tag_kG4107       | Wallington et al.            |
|        | transfer: | $\text{CH}_3\text{OOH} \rightarrow 0.5 \text{H}_2\text{O} + \text{CH}_3\text{O}_2 + \text{HCHO} + \text{OH}$                                                                                                                                                                       |                  |                              |
|        | tag: FHM  | $\text{OH} + {}^{\text{FHM}}\text{CH}_3\text{OOH} \rightarrow \text{OH} + 0.6 {}^{\text{FHM}}\text{CH}_3\text{O}_2 + 0.4 {}^{\text{FHM}}\text{HCHO} + 0.4 {}^{\text{FHM}}\text{OH} + 0.4 \text{PTPFHMrOH} + 0.5 {}^{\text{FHM}}\text{H}_2\text{O} + 0.5 \text{PTPFHMrH}_2\text{O}$ | tag_kG4107       |                              |
|        | tag: FHM  | $\text{OH} + {}^{\text{FHM}}\text{CH}_3\text{OOH} \rightarrow \text{OH} + 0.6 {}^{\text{FHM}}\text{CH}_3\text{O}_2 + 0.4 {}^{\text{FHM}}\text{HCHO} + 0.4 {}^{\text{FHM}}\text{OH} + 0.4 \text{PTPFHMrOH} + 0.5 {}^{\text{FHM}}\text{H}_2\text{O} + 0.5 \text{PTPFHMrH}_2\text{O}$ | tag_kG4107       |                              |
|        | transfer: | $\text{OH} \rightarrow 0.5 \text{H}_2\text{O}$                                                                                                                                                                                                                                     |                  |                              |
|        | tag: FHM  | $\text{CH}_3\text{OOH} + {}^{\text{FHM}}\text{OH} \rightarrow \text{CH}_3\text{OOH} + 0.5 {}^{\text{FHM}}\text{H}_2\text{O} + 0.5 \text{PTPFHMrH}_2\text{O} + \text{PTLFHMrOH}$                                                                                                    | tag_kG4107       |                              |

Table 1: Gas phase reactions (... continued)

| #     | labels    | reaction                                                                                                                                                                               | rate coefficient                                       | reference                 |
|-------|-----------|----------------------------------------------------------------------------------------------------------------------------------------------------------------------------------------|--------------------------------------------------------|---------------------------|
| G4108 | tag: FHM  | $\text{CH}_3\text{OOH} + {}^{\text{FHM}}\text{rOH} \rightarrow \text{CH}_3\text{OOH} + 0.5 {}^{\text{FHM}}\text{rH}_2\text{O} + 0.5$<br>$\text{PTPFHMrH}_2\text{O} + \text{PTLFHMrOH}$ | tag_kG4107                                             | Sivakumaran et al. (2003) |
|       | StTrG     | $\text{HCHO} + \text{OH} \rightarrow \text{CO} + \text{H}_2\text{O} + \text{HO}_2$                                                                                                     | tag_kG4108                                             |                           |
|       | transfer: | $\text{HCHO} \rightarrow 0.5 \text{H}_2\text{O} + \text{HO}_2$                                                                                                                         |                                                        |                           |
|       | tag: FHM  | $\text{OH} + {}^{\text{FHM}}\text{HCHO} \rightarrow \text{OH} + 0.5 {}^{\text{FHM}}\text{H}_2\text{O} + 0.5$<br>$\text{PTPFHMH}_2\text{O} + {}^{\text{FHM}}\text{HO}_2$                | tag_kG4108                                             |                           |
|       | tag: FHM  | $\text{OH} + {}^{\text{FHM}}\text{rHCHO} \rightarrow \text{OH} + 0.5 {}^{\text{FHM}}\text{rH}_2\text{O} + 0.5$<br>$\text{PTPFHMrH}_2\text{O} + {}^{\text{FHM}}\text{rHO}_2$            | tag_kG4108                                             |                           |
|       | transfer: | $\text{OH} \rightarrow 0.5 \text{H}_2\text{O}$                                                                                                                                         |                                                        |                           |
|       | tag: FHM  | $\text{HCHO} + {}^{\text{FHM}}\text{OH} \rightarrow \text{HCHO} + 0.5 {}^{\text{FHM}}\text{H}_2\text{O} + 0.5$<br>$\text{PTPFHMH}_2\text{O} + \text{PTLFHMOH}$                         | tag_kG4108                                             |                           |
|       | tag: FHM  | $\text{HCHO} + {}^{\text{FHM}}\text{rOH} \rightarrow \text{HCHO} + 0.5 {}^{\text{FHM}}\text{rH}_2\text{O} + 0.5$<br>$\text{PTPFHMrH}_2\text{O} + \text{PTLFHMrOH}$                     | tag_kG4108                                             |                           |
|       | TrGN      | $\text{HCHO} + \text{NO}_3 \rightarrow \text{LossO3C} + \text{LossO3} + \text{HNO}_3 + \text{CO} +$<br>$\text{HO}_2$                                                                   | tag_kG4109                                             |                           |
|       | tag: FHM  | ${}^{\text{FHM}}\text{HCHO} + \text{NO}_3 \rightarrow \text{NO}_3 + {}^{\text{FHM}}\text{HNO}_3 + {}^{\text{FHM}}\text{HO}_2$                                                          | tag_kG4109                                             |                           |
| G4110 | tag: FHM  | ${}^{\text{FHM}}\text{rHCHO} + \text{NO}_3 \rightarrow \text{NO}_3 + {}^{\text{FHM}}\text{rHNO}_3 + {}^{\text{FHM}}\text{rHO}_2$                                                       | tag_kG4109                                             | McCabe et al. (2001)      |
|       | UpStTrG   | $\text{CO} + \text{OH} \rightarrow \text{H} + \text{CO}_2$                                                                                                                             | tag_kG4110                                             |                           |
|       | tag: FHM  | ${}^{\text{FHM}}\text{OH} + \text{CO} \rightarrow \text{CO} + {}^{\text{FHM}}\text{H} + \text{PTLFHMOH}$                                                                               | tag_kG4110                                             |                           |
|       | tag: FHM  | ${}^{\text{FHM}}\text{rOH} + \text{CO} \rightarrow \text{CO} + {}^{\text{FHM}}\text{rH} + \text{PTLFHMrOH}$                                                                            | tag_kG4110                                             |                           |
| G4111 | TrG       | $\text{HCOOH} + \text{OH} \rightarrow \text{CO}_2 + \text{HO}_2 + \text{H}_2\text{O}$                                                                                                  | tag_kG4111                                             | Paulot et al. (2011)      |
|       | transfer: | $\text{HCOOH} \rightarrow 0.5 \text{H}_2\text{O} + \text{HO}_2$                                                                                                                        |                                                        |                           |
|       | tag: FHM  | $\text{OH} + {}^{\text{FHM}}\text{HCOOH} \rightarrow \text{OH} + {}^{\text{FHM}}\text{HO}_2 + 0.5 {}^{\text{FHM}}\text{H}_2\text{O} +$<br>$0.5 \text{PTPFHMH}_2\text{O}$               | tag_kG4111                                             |                           |
|       | tag: FHM  | $\text{OH} + {}^{\text{FHM}}\text{rHCOOH} \rightarrow \text{OH} + {}^{\text{FHM}}\text{rHO}_2 + 0.5 {}^{\text{FHM}}\text{rH}_2\text{O} +$<br>$0.5 \text{PTPFHMrH}_2\text{O}$           | tag_kG4111                                             |                           |
|       | transfer: | $\text{OH} \rightarrow 0.5 \text{H}_2\text{O}$                                                                                                                                         |                                                        |                           |
|       | tag: FHM  | $\text{HCOOH} + {}^{\text{FHM}}\text{OH} \rightarrow \text{HCOOH} + 0.5 {}^{\text{FHM}}\text{H}_2\text{O} + 0.5$<br>$\text{PTPFHMH}_2\text{O} + \text{PTLFHMOH}$                       | tag_kG4111                                             |                           |
|       | tag: FHM  | $\text{HCOOH} + {}^{\text{FHM}}\text{rOH} \rightarrow \text{HCOOH} + 0.5 {}^{\text{FHM}}\text{rH}_2\text{O} + 0.5$<br>$\text{PTPFHMrH}_2\text{O} + \text{PTLFHMrOH}$                   | tag_kG4111                                             |                           |
|       | UpStG     | $\text{CO} + \text{O}(^3\text{P}) \rightarrow 1. \text{LossO3C} + 1. \text{LossO3} + \text{CO}_2$                                                                                      | $6.60\text{E}-33 \cdot \text{EXP}(-1103./\text{temp})$ |                           |
|       | UpStG     | $\text{CH}_4 + \text{O}(^3\text{P}) \rightarrow \text{LossO3C} + \text{LossO3} + 0.51 \text{CH}_3 + 0.51$<br>$\text{OH} + 0.49 \text{CH}_3\text{O} + 0.49 \text{H}$                    | tag_kG4113                                             |                           |
|       |           |                                                                                                                                                                                        |                                                        |                           |

Table 1: Gas phase reactions (... continued)

| #     | labels    | reaction                                                                                                                                                                                                                                                                         | rate coefficient | reference              |
|-------|-----------|----------------------------------------------------------------------------------------------------------------------------------------------------------------------------------------------------------------------------------------------------------------------------------|------------------|------------------------|
|       | tag: FHM  | ${}^{\text{FHM}}\text{CH}_4 + \text{O}({}^3\text{P}) \rightarrow \text{O}({}^3\text{P}) + 0.51 {}^{\text{FHM}}\text{CH}_3 + 0.51 {}^{\text{FHM}}\text{OH} + 0.51 \text{PTPFHMOH} + 0.49 {}^{\text{FHM}}\text{CH}_3\text{O} + 0.49 {}^{\text{FHM}}\text{H} + \text{PTLFHMCH}_4$   | tag_kG4113       |                        |
|       | tag: FHM  | ${}^{\text{FHM}}\text{CH}_4 + \text{O}({}^3\text{P}) \rightarrow \text{O}({}^3\text{P}) + 0.51 {}^{\text{FHM}}\text{CH}_3 + 0.51 {}^{\text{FHM}}\text{OH} + 0.51 \text{PTPFHMrOH} + 0.49 {}^{\text{FHM}}\text{CH}_3\text{O} + 0.49 {}^{\text{FHM}}\text{H} + \text{PTLFHMrCH}_4$ | tag_kG4113       |                        |
| G4114 | StTrGN    | $\text{CH}_3\text{O}_2 + \text{NO}_2 \rightarrow \text{LossO3C} + \text{LossO3} + \text{CH}_3\text{O}_2\text{NO}_2$                                                                                                                                                              | tag_kG4114       | Sander et al. (2011)   |
|       | tag: FHM  | ${}^{\text{FHM}}\text{CH}_3\text{O}_2 + \text{NO}_2 \rightarrow \text{NO}_2 + {}^{\text{FHM}}\text{CH}_3\text{O}_2\text{NO}_2$                                                                                                                                                   | tag_kG4114       |                        |
|       | tag: FHM  | ${}^{\text{FHM}}\text{CH}_3\text{O}_2 + \text{NO}_2 \rightarrow \text{NO}_2 + {}^{\text{FHM}}\text{CH}_3\text{O}_2\text{NO}_2$                                                                                                                                                   | tag_kG4114       |                        |
| G4115 | StTrGN    | $\text{CH}_3\text{O}_2\text{NO}_2 \rightarrow \text{ProdO3C} + \text{ProdO3} + \text{CH}_3\text{O}_2 + \text{NO}_2$                                                                                                                                                              | tag_kG4115       | Sander et al. (2011)   |
|       | tag: FHM  | ${}^{\text{FHM}}\text{CH}_3\text{O}_2\text{NO}_2 \rightarrow {}^{\text{FHM}}\text{CH}_3\text{O}_2$                                                                                                                                                                               | tag_kG4115       |                        |
|       | tag: FHM  | ${}^{\text{FHM}}\text{CH}_3\text{O}_2\text{NO}_2 \rightarrow {}^{\text{FHM}}\text{CH}_3\text{O}_2$                                                                                                                                                                               | tag_kG4115       |                        |
| G4116 | StTrGN    | $\text{CH}_3\text{O}_2\text{NO}_2 + \text{OH} \rightarrow 2 \text{ProdO3C} + 2 \text{ProdO3} + \text{HCHO} + \text{NO}_3 + \text{H}_2\text{O}$                                                                                                                                   | tag_kG4116       |                        |
|       | transfer: | $\text{CH}_3\text{O}_2\text{NO}_2 \rightarrow \text{HCHO}$                                                                                                                                                                                                                       |                  |                        |
|       | tag: FHM  | $\text{OH} + {}^{\text{FHM}}\text{CH}_3\text{O}_2\text{NO}_2 \rightarrow \text{OH} + {}^{\text{FHM}}\text{HCHO}$                                                                                                                                                                 | tag_kG4116       |                        |
|       | tag: FHM  | $\text{OH} + {}^{\text{FHM}}\text{CH}_3\text{O}_2\text{NO}_2 \rightarrow \text{OH} + {}^{\text{FHM}}\text{HCHO}$                                                                                                                                                                 | tag_kG4116       |                        |
|       | transfer: | $\text{OH} \rightarrow \text{H}_2\text{O}$                                                                                                                                                                                                                                       |                  |                        |
|       | tag: FHM  | $\text{CH}_3\text{O}_2\text{NO}_2 + {}^{\text{FHM}}\text{OH} \rightarrow \text{CH}_3\text{O}_2\text{NO}_2 + {}^{\text{FHM}}\text{H}_2\text{O} + \text{PTPFHMH}_2\text{O} + \text{PTLFHMOH}$                                                                                      | tag_kG4116       |                        |
|       | tag: FHM  | $\text{CH}_3\text{O}_2\text{NO}_2 + {}^{\text{FHM}}\text{OH} \rightarrow \text{CH}_3\text{O}_2\text{NO}_2 + {}^{\text{FHM}}\text{H}_2\text{O} + \text{PTPFHMrH}_2\text{O} + \text{PTLFHMrOH}$                                                                                    | tag_kG4116       |                        |
| G4117 | StTrGN    | $\text{CH}_3\text{ONO}_2 + \text{OH} \rightarrow \text{ProdO3C} + \text{ProdO3} + \text{H}_2\text{O} + \text{HCHO} + \text{NO}_2$                                                                                                                                                | tag_kG4117       | Atkinson et al. (2006) |
|       | transfer: | $\text{CH}_3\text{ONO}_2 \rightarrow \text{HCHO}$                                                                                                                                                                                                                                |                  |                        |
|       | tag: FHM  | $\text{OH} + {}^{\text{FHM}}\text{CH}_3\text{ONO}_2 \rightarrow \text{OH} + {}^{\text{FHM}}\text{HCHO}$                                                                                                                                                                          | tag_kG4117       |                        |
|       | tag: FHM  | $\text{OH} + {}^{\text{FHM}}\text{CH}_3\text{ONO}_2 \rightarrow \text{OH} + {}^{\text{FHM}}\text{HCHO}$                                                                                                                                                                          | tag_kG4117       |                        |
|       | transfer: | $\text{OH} \rightarrow \text{H}_2\text{O}$                                                                                                                                                                                                                                       |                  |                        |
|       | tag: FHM  | $\text{CH}_3\text{ONO}_2 + {}^{\text{FHM}}\text{OH} \rightarrow \text{CH}_3\text{ONO}_2 + {}^{\text{FHM}}\text{H}_2\text{O} + \text{PTPFHMH}_2\text{O} + \text{PTLFHMOH}$                                                                                                        | tag_kG4117       |                        |
|       | tag: FHM  | $\text{CH}_3\text{ONO}_2 + {}^{\text{FHM}}\text{OH} \rightarrow \text{CH}_3\text{ONO}_2 + {}^{\text{FHM}}\text{H}_2\text{O} + \text{PTPFHMrH}_2\text{O} + \text{PTLFHMrOH}$                                                                                                      | tag_kG4117       |                        |
| G4118 | StTrG     | $\text{CH}_3\text{O} \rightarrow \text{HO}_2 + \text{HCHO}$                                                                                                                                                                                                                      | tag_kG4118       | Chai et al. (2014)     |
|       | transfer: | $\text{CH}_3\text{O} \rightarrow \text{HO}_2 + \text{HCHO}$                                                                                                                                                                                                                      |                  |                        |
|       | tag: FHM  | ${}^{\text{FHM}}\text{CH}_3\text{O} \rightarrow + {}^{\text{FHM}}\text{HO}_2 + {}^{\text{FHM}}\text{HCHO}$                                                                                                                                                                       | tag_kG4118       |                        |

Table 1: Gas phase reactions (... continued)

| #      | labels    | reaction                                                                                                                                                                            | rate coefficient | reference                |
|--------|-----------|-------------------------------------------------------------------------------------------------------------------------------------------------------------------------------------|------------------|--------------------------|
| G4119a | tag: FHM  | $\text{FHM}_{\text{r}}\text{CH}_3\text{O} \rightarrow + \text{FHM}_{\text{r}}\text{HO}_2 + \text{FHM}_{\text{r}}\text{HCHO}$                                                        | tag_kG4118       | Atkinson et al. (2006)   |
|        | StTrGN    | $\text{CH}_3\text{O} + \text{NO}_2 \rightarrow \text{LossO3C} + \text{LossO3} + \text{CH}_3\text{ONO}_2$                                                                            | tag_kG4119a      |                          |
|        | tag: FHM  | $\text{FHM}\text{CH}_3\text{O} + \text{NO}_2 \rightarrow \text{NO}_2 + \text{FHM}\text{CH}_3\text{ONO}_2$                                                                           | tag_kG4119a      |                          |
| G4119b | tag: FHM  | $\text{FHM}_{\text{r}}\text{CH}_3\text{O} + \text{NO}_2 \rightarrow \text{NO}_2 + \text{FHM}_{\text{r}}\text{CH}_3\text{ONO}_2$                                                     | tag_kG4119a      | Atkinson et al. (2006)   |
|        | StTrGN    | $\text{CH}_3\text{O} + \text{NO}_2 \rightarrow \text{LossO3C} + \text{LossO3} + \text{HCHO} + \text{HONO}$                                                                          | tag_kG4119b      |                          |
|        | tag: FHM  | $\text{FHM}\text{CH}_3\text{O} + \text{NO}_2 \rightarrow \text{NO}_2 + \text{FHM}\text{HCHO} + \text{FHM}\text{HONO}$                                                               | tag_kG4119b      |                          |
| G4120a | tag: FHM  | $\text{FHM}_{\text{r}}\text{CH}_3\text{O} + \text{NO}_2 \rightarrow \text{NO}_2 + \text{FHM}_{\text{r}}\text{HCHO} + \text{FHM}_{\text{r}}\text{HONO}$                              | tag_kG4119b      | Atkinson et al. (2006)   |
|        | StTrGN    | $\text{CH}_3\text{O} + \text{NO} \rightarrow \text{CH}_3\text{ONO}$                                                                                                                 | tag_kG4120a      |                          |
|        | tag: FHM  | $\text{FHM}\text{CH}_3\text{O} + \text{NO} \rightarrow \text{NO} + \text{FHM}\text{CH}_3\text{ONO}$                                                                                 | tag_kG4120a      |                          |
| G4120b | tag: FHM  | $\text{FHM}_{\text{r}}\text{CH}_3\text{O} + \text{NO} \rightarrow \text{NO} + \text{FHM}_{\text{r}}\text{CH}_3\text{ONO}$                                                           | tag_kG4120a      | Atkinson et al. (2006)   |
|        | StTrGN    | $\text{CH}_3\text{O} + \text{NO} \rightarrow \text{HCHO} + \text{HNO}$                                                                                                              | tag_kG4120b      |                          |
|        | tag: FHM  | $\text{FHM}\text{CH}_3\text{O} + \text{NO} \rightarrow \text{NO} + \text{FHM}\text{HCHO} + \text{FHM}\text{HNO}$                                                                    | tag_kG4120b      |                          |
| G4121  | tag: FHM  | $\text{FHM}_{\text{r}}\text{CH}_3\text{O} + \text{NO} \rightarrow \text{NO} + \text{FHM}_{\text{r}}\text{HCHO} + \text{FHM}_{\text{r}}\text{HNO}$                                   | tag_kG4120b      | Sander et al. (2011)     |
|        | StTrG     | $\text{CH}_3\text{O}_2 + \text{O}_3 \rightarrow \text{LossO3C} + \text{LossO3} + \text{CH}_3\text{O} + 2 \text{O}_2$                                                                | tag_kG4121       |                          |
|        | tag: FHM  | $\text{FHM}\text{CH}_3\text{O}_2 + \text{O}_3 \rightarrow \text{O}_3 + \text{FHM}\text{CH}_3\text{O}$                                                                               | tag_kG4121       |                          |
| G4122  | tag: FHM  | $\text{FHM}_{\text{r}}\text{CH}_3\text{O}_2 + \text{O}_3 \rightarrow \text{O}_3 + \text{FHM}_{\text{r}}\text{CH}_3\text{O}$                                                         | tag_kG4121       | Nielsen et al. (1991)    |
|        | StTrGN    | $\text{CH}_3\text{ONO} + \text{OH} \rightarrow \text{H}_2\text{O} + \text{HCHO} + \text{NO}$                                                                                        | tag_kG4122       |                          |
|        | transfer: | $\text{CH}_3\text{ONO} \rightarrow \text{HCHO}$                                                                                                                                     |                  |                          |
|        | tag: FHM  | $\text{OH} + \text{FHM}\text{CH}_3\text{ONO} \rightarrow \text{OH} + \text{FHM}\text{HCHO}$                                                                                         | tag_kG4122       |                          |
|        | tag: FHM  | $\text{OH} + \text{FHM}_{\text{r}}\text{CH}_3\text{ONO} \rightarrow \text{OH} + \text{FHM}_{\text{r}}\text{HCHO}$                                                                   | tag_kG4122       |                          |
|        | transfer: | $\text{OH} \rightarrow \text{H}_2\text{O}$                                                                                                                                          |                  |                          |
|        | tag: FHM  | $\text{CH}_3\text{ONO} + \text{FHM}\text{OH} \rightarrow \text{CH}_3\text{ONO} + \text{FHM}\text{H}_2\text{O} + \text{PTPFHMH}_2\text{O} + \text{PTLFHMOH}$                         | tag_kG4122       |                          |
|        | tag: FHM  | $\text{CH}_3\text{ONO} + \text{FHM}_{\text{r}}\text{OH} \rightarrow \text{CH}_3\text{ONO} + \text{FHM}_{\text{r}}\text{H}_2\text{O} + \text{PTPFHMrH}_2\text{O} + \text{PTLFHMrOH}$ | tag_kG4122       |                          |
|        |           |                                                                                                                                                                                     |                  |                          |
| G4133  | StTrG     | $\text{CH}_3\text{O}_2 + \text{OH} \rightarrow \text{CH}_3\text{O} + \text{HO}_2$                                                                                                   | tag_kG4133       | Bossolasco et al. (2014) |
|        | transfer: | $\text{CH}_3\text{O}_2 \rightarrow \text{CH}_3\text{O}$                                                                                                                             |                  |                          |
|        | tag: FHM  | $\text{OH} + \text{FHM}\text{CH}_3\text{O}_2 \rightarrow \text{OH} + \text{FHM}\text{CH}_3\text{O}$                                                                                 | tag_kG4133       |                          |
|        | tag: FHM  | $\text{OH} + \text{FHM}_{\text{r}}\text{CH}_3\text{O}_2 \rightarrow \text{OH} + \text{FHM}_{\text{r}}\text{CH}_3\text{O}$                                                           | tag_kG4133       |                          |
|        | transfer: | $\text{OH} \rightarrow \text{HO}_2$                                                                                                                                                 |                  |                          |
|        | tag: FHM  | $\text{CH}_3\text{O}_2 + \text{FHM}\text{OH} \rightarrow \text{CH}_3\text{O}_2 + \text{FHM}\text{HO}_2 + \text{PTLFHMOH}$                                                           | tag_kG4133       |                          |
| G4151  | tag: FHM  | $\text{CH}_3\text{O}_2 + \text{FHM}_{\text{r}}\text{OH} \rightarrow \text{CH}_3\text{O}_2 + \text{FHM}_{\text{r}}\text{HO}_2 + \text{PTLFHMrOH}$                                    | tag_kG4133       | Atkinson et al. (2006)   |
|        | StTrG     | $\text{CH}_3 + \text{O}_2 \rightarrow \text{CH}_3\text{O}_2$                                                                                                                        | tag_kG4151       |                          |
|        | tag: FHM  | $\text{FHM}\text{CH}_3 + \text{O}_2 \rightarrow \text{O}_2 + \text{FHM}\text{CH}_3\text{O}_2$                                                                                       | tag_kG4151       |                          |
|        | tag: FHM  | $\text{FHM}_{\text{r}}\text{CH}_3 + \text{O}_2 \rightarrow \text{O}_2 + \text{FHM}_{\text{r}}\text{CH}_3\text{O}_2$                                                                 | tag_kG4151       |                          |

Table 1: Gas phase reactions (... continued)

| #     | labels   | reaction                                                                                                                                                                                                                                                                                                                             | rate coefficient                                                                                | reference                   |
|-------|----------|--------------------------------------------------------------------------------------------------------------------------------------------------------------------------------------------------------------------------------------------------------------------------------------------------------------------------------------|-------------------------------------------------------------------------------------------------|-----------------------------|
| G4152 | StTrG    | $\text{CH}_3 + \text{O}_3 \rightarrow \text{LossO3C} + \text{LossO3} + 0.956 \text{ HCHO} + 0.956$                                                                                                                                                                                                                                   | tag_kG4152                                                                                      | Albaladejo et al. (2002), ? |
|       | tag: FHM | $\text{H} + 0.044 \text{ CH}_3\text{O} + \text{O}_2$<br>$^{\text{FHM}}\text{CH}_3 + \text{O}_3 \rightarrow \text{O}_3 + 0.956 \text{ }^{\text{FHM}}\text{HCHO} + 0.956 \text{ }^{\text{FHM}}\text{H} +$<br>$0.044 \text{ }^{\text{FHM}}\text{CH}_3\text{O}$                                                                          | tag_kG4152                                                                                      |                             |
|       | tag: FHM | $^{\text{FHM}_r}\text{CH}_3 + \text{O}_3 \rightarrow \text{O}_3 + 0.956 \text{ }^{\text{FHM}_r}\text{HCHO} + 0.956 \text{ }^{\text{FHM}_r}\text{H}$<br>$+ 0.044 \text{ }^{\text{FHM}_r}\text{CH}_3\text{O}$                                                                                                                          | tag_kG4152                                                                                      |                             |
| G4153 | StTrG    | $\text{CH}_3 + \text{O}(^3\text{P}) \rightarrow \text{LossO3C} + \text{LossO3} + 0.83 \text{ HCHO} + 0.83$                                                                                                                                                                                                                           | tag_kG4153                                                                                      | Atkinson et al. (2006)      |
|       | tag: FHM | $\text{H} + 0.17 \text{ CO} + 0.17 \text{ H}_2 + 0.17 \text{ H}$<br>$^{\text{FHM}}\text{CH}_3 + \text{O}(^3\text{P}) \rightarrow \text{O}(^3\text{P}) + 0.83 \text{ }^{\text{FHM}}\text{HCHO} + 0.83$<br>$^{\text{FHM}}\text{H} + 0.17 \text{ }^{\text{FHM}}\text{H}_2 + 0.17 \text{ PTPFHM}_2 + 0.17 \text{ }^{\text{FHM}}\text{H}$ | tag_kG4153                                                                                      |                             |
|       | tag: FHM | $^{\text{FHM}_r}\text{CH}_3 + \text{O}(^3\text{P}) \rightarrow \text{O}(^3\text{P}) + 0.83 \text{ }^{\text{FHM}_r}\text{HCHO} + 0.83$<br>$^{\text{FHM}_r}\text{H} + 0.17 \text{ }^{\text{FHM}_r}\text{H}_2 + 0.17 \text{ PTPFHM}_r\text{H}_2 + 0.17 \text{ }^{\text{FHM}_r}\text{H}$                                                 | tag_kG4153                                                                                      |                             |
| G4154 | StTrG    | $\text{CH}_3\text{O} + \text{O}_3 \rightarrow \text{LossO3C} + \text{LossO3} + \text{CH}_3\text{O}_2 + \text{O}_2$                                                                                                                                                                                                                   | tag_kG4154                                                                                      | Albaladejo et al. (2002)    |
|       | tag: FHM | $^{\text{FHM}}\text{CH}_3\text{O} + \text{O}_3 \rightarrow \text{O}_3 + \text{ }^{\text{FHM}}\text{CH}_3\text{O}_2$                                                                                                                                                                                                                  | tag_kG4154                                                                                      |                             |
|       | tag: FHM | $^{\text{FHM}_r}\text{CH}_3\text{O} + \text{O}_3 \rightarrow \text{O}_3 + \text{ }^{\text{FHM}_r}\text{CH}_3\text{O}_2$                                                                                                                                                                                                              | tag_kG4154                                                                                      |                             |
| G4155 | StTrG    | $\text{CH}_3\text{O} + \text{O}(^3\text{P}) \rightarrow \text{LossO3C} + \text{LossO3} + 0.75 \text{ CH}_3 + 0.75$                                                                                                                                                                                                                   | tag_kG4155                                                                                      | Baulch et al. (2005)        |
|       | tag: FHM | $\text{O}_2 + 0.25 \text{ HCHO} + 0.25 \text{ OH}$<br>$^{\text{FHM}}\text{CH}_3\text{O} + \text{O}(^3\text{P}) \rightarrow \text{O}(^3\text{P}) + 0.75 \text{ }^{\text{FHM}}\text{CH}_3 + 0.25$<br>$^{\text{FHM}}\text{HCHO} + 0.25 \text{ }^{\text{FHM}}\text{OH} + 0.25 \text{ PTPFHM}_r\text{OH}$                                 | tag_kG4155                                                                                      |                             |
|       | tag: FHM | $^{\text{FHM}_r}\text{CH}_3\text{O} + \text{O}(^3\text{P}) \rightarrow \text{O}(^3\text{P}) + 0.75 \text{ }^{\text{FHM}_r}\text{CH}_3 + 0.25$<br>$^{\text{FHM}_r}\text{HCHO} + 0.25 \text{ }^{\text{FHM}_r}\text{OH} + 0.25 \text{ PTPFHM}_r\text{OH}$                                                                               | tag_kG4155                                                                                      |                             |
| G4156 | StTrG    | $\text{CH}_3\text{O}_2 + \text{O}(^3\text{P}) \rightarrow \text{LossO3C} + \text{LossO3} + \text{CH}_3\text{O} + \text{O}_2$                                                                                                                                                                                                         | tag_kG4156                                                                                      | Zellner et al. (1988)       |
|       | tag: FHM | $^{\text{FHM}}\text{CH}_3\text{O}_2 + \text{O}(^3\text{P}) \rightarrow \text{O}(^3\text{P}) + \text{ }^{\text{FHM}}\text{CH}_3\text{O}$                                                                                                                                                                                              | tag_kG4156                                                                                      |                             |
|       | tag: FHM | $^{\text{FHM}_r}\text{CH}_3\text{O}_2 + \text{O}(^3\text{P}) \rightarrow \text{O}(^3\text{P}) + \text{ }^{\text{FHM}_r}\text{CH}_3\text{O}$                                                                                                                                                                                          | tag_kG4156                                                                                      |                             |
| G4157 | StTrG    | $\text{HCHO} + \text{O}(^3\text{P}) \rightarrow \text{LossO3C} + \text{LossO3} + 0.7 \text{ OH} + 0.7$                                                                                                                                                                                                                               | tag_kG4157                                                                                      | Sander et al. (2011)        |
|       | tag: FHM | $\text{CO} + 0.3 \text{ H} + 0.3 \text{ CO}_2 + \text{HO}_2$<br>$^{\text{FHM}}\text{HCHO} + \text{O}(^3\text{P}) \rightarrow \text{O}(^3\text{P}) + 0.7 \text{ }^{\text{FHM}}\text{OH} + 0.7$<br>$\text{PTPFHM}_r\text{OH} + 0.3 \text{ }^{\text{FHM}}\text{H} + \text{ }^{\text{FHM}}\text{HO}_2$                                   | tag_kG4157                                                                                      |                             |
|       | tag: FHM | $^{\text{FHM}_r}\text{HCHO} + \text{O}(^3\text{P}) \rightarrow \text{O}(^3\text{P}) + 0.7 \text{ }^{\text{FHM}_r}\text{OH} + 0.7$<br>$\text{PTPFHM}_r\text{OH} + 0.3 \text{ }^{\text{FHM}_r}\text{H} + \text{ }^{\text{FHM}_r}\text{HO}_2$                                                                                           | tag_kG4157                                                                                      |                             |
| G4200 | TrGC     | $\text{C}_2\text{H}_6 + \text{OH} \rightarrow \text{C}_2\text{H}_5\text{O}_2 + \text{H}_2\text{O}$                                                                                                                                                                                                                                   | $1.49\text{E}-17 \cdot \text{temp} \cdot \text{temp} \cdot \text{EXP}(-499./$<br>$\text{temp})$ | Atkinson (2003)             |
| G4201 | TrGC     | $\text{C}_2\text{H}_4 + \text{O}_3 \rightarrow 1. \text{ LossO3R} + 1. \text{ LossO3} + \text{HCHO} + .63$<br>$\text{CO} + .13 \text{ HO}_2 + 0.23125 \text{ HCOOH} + 0.13875 \text{ HCHO} +$<br>$0.13875 \text{ H}_2\text{O}_2 + .13 \text{ OH}$                                                                                    | $1.2\text{E}-14 \cdot \text{EXP}(-2630./\text{temp})$                                           | Sander et al. (2011)*       |

Table 1: Gas phase reactions (... continued)

| #      | labels | reaction                                                                                                                                                                                  | rate coefficient                                                                                | reference                                        |
|--------|--------|-------------------------------------------------------------------------------------------------------------------------------------------------------------------------------------------|-------------------------------------------------------------------------------------------------|--------------------------------------------------|
| G4202  | TrGC   | $\text{C}_2\text{H}_4 + \text{OH} \rightarrow .6666667 \text{ CH}_3\text{CH}(\text{O}_2)\text{CH}_2\text{OH}$                                                                             | $k_{\text{3rd}}(\text{temp}, \text{cair}, 1.0\text{E-}28, 4.5, 7.5\text{E-}12, 0.85, 0.6)$      | Sander et al. (2011)                             |
| G4203  | TrGC   | $\text{C}_2\text{H}_5\text{O}_2 + \text{HO}_2 \rightarrow \text{C}_2\text{H}_5\text{OOH}$                                                                                                 | $7.5\text{E-}13 * \text{EXP}(700./\text{temp})$                                                 | Sander et al. (2011)                             |
| G4204  | TrGCN  | $\text{C}_2\text{H}_5\text{O}_2 + \text{NO} \rightarrow 1. \text{ ProdO3R} + 1. \text{ ProdO3} + \text{CH}_3\text{CHO} + \text{HO}_2 + \text{NO}_2$                                       | $2.6\text{E-}12 * \text{EXP}(365./\text{temp})$                                                 | Sander et al. (2011)                             |
| G4205  | TrGCN  | $\text{C}_2\text{H}_5\text{O}_2 + \text{NO}_3 \rightarrow 1. \text{ LossO3R} + 1. \text{ LossO3} + \text{CH}_3\text{CHO} + \text{HO}_2 + \text{NO}_2$                                     | $2.3\text{E-}12$                                                                                | Wallington et al.                                |
| G4206  | TrGC   | $\text{C}_2\text{H}_5\text{O}_2 + \text{CH}_3\text{O}_2 \rightarrow .75 \text{ HCHO} + \text{HO}_2 + .75 \text{ CH}_3\text{CHO} + .25 \text{ CH}_3\text{OH}$                              | $1.6\text{E-}13 * \text{EXP}(195./\text{temp})$                                                 | see note*                                        |
| G4207  | TrGC   | $\text{C}_2\text{H}_5\text{OOH} + \text{OH} \rightarrow .3 \text{ C}_2\text{H}_5\text{O}_2 + .7 \text{ CH}_3\text{CHO} + .7 \text{ OH}$                                                   | $k_{\text{CH300H\_OH}}$                                                                         | see note*                                        |
| G4208  | TrGC   | $\text{CH}_3\text{CHO} + \text{OH} \rightarrow \text{CH}_3\text{C}(\text{O})\text{OO} + \text{H}_2\text{O}$                                                                               | $4.4\text{E-}12 * \text{EXP}(365./\text{temp})$                                                 | Atkinson et al. (2006)                           |
| G4209  | TrGCN  | $\text{CH}_3\text{CHO} + \text{NO}_3 \rightarrow 1. \text{ LossO3R} + 1. \text{ LossO3} + \text{CH}_3\text{C}(\text{O})\text{OO} + \text{HNO}_3$                                          | $1.4\text{E-}12 * \text{EXP}(-1900./\text{temp})$                                               | Sander et al. (2011)                             |
| G4210  | TrGC   | $\text{CH}_3\text{COOH} + \text{OH} \rightarrow \text{CH}_3\text{O}_2 + \text{CO}_2 + \text{H}_2\text{O}$                                                                                 | $4.2\text{E-}14 * \text{EXP}(855./\text{temp})$                                                 | Atkinson et al. (2006)                           |
| G4211a | TrGC   | $\text{CH}_3\text{C}(\text{O})\text{OO} + \text{HO}_2 \rightarrow \text{CH}_3\text{C}(\text{O})\text{OOH}$                                                                                | $4.3\text{E-}13 * \text{EXP}(1040./\text{temp}) / (1. + 1./37. * \text{EXP}(660./\text{temp}))$ | Tyndall et al. (2001)                            |
| G4211b | TrGC   | $\text{CH}_3\text{C}(\text{O})\text{OO} + \text{HO}_2 \rightarrow 1. \text{ ProdO3R} + 1. \text{ ProdO3} + \text{CH}_3\text{COOH} + \text{O}_3$                                           | $4.3\text{E-}13 * \text{EXP}(1040./\text{temp}) / (1. + 37. * \text{EXP}(-660./\text{temp}))$   | Tyndall et al. (2001)                            |
| G4212  | TrGCN  | $\text{CH}_3\text{C}(\text{O})\text{OO} + \text{NO} \rightarrow 1. \text{ ProdO3R} + 1. \text{ ProdO3} + \text{CH}_3\text{O}_2 + \text{CO}_2 + \text{NO}_2$                               | $8.1\text{E-}12 * \text{EXP}(270./\text{temp})$                                                 | Tyndall et al. (2001)                            |
| G4213  | TrGCN  | $\text{CH}_3\text{C}(\text{O})\text{OO} + \text{NO}_2 \rightarrow \text{PAN}$                                                                                                             | $k_{\text{CH3C03\_N02}}$                                                                        | Sander et al. (2011)*                            |
| G4214  | TrGCN  | $\text{CH}_3\text{C}(\text{O})\text{OO} + \text{NO}_3 \rightarrow 1. \text{ LossO3R} + 1. \text{ LossO3} + \text{CH}_3\text{O}_2 + \text{NO}_2 + \text{CO}_2$                             | $4.\text{E-}12$                                                                                 | Canosa-Mas et al. (1996)                         |
| G4215a | TrGC   | $\text{CH}_3\text{C}(\text{O})\text{OO} + \text{CH}_3\text{O}_2 \rightarrow \text{HCHO} + \text{HO}_2 + \text{CH}_3\text{O}_2 + \text{CO}_2$                                              | $0.9 * 2.0\text{E-}12 * \text{EXP}(500./\text{temp})$                                           | Sander et al. (2011)                             |
| G4215b | TrGC   | $\text{CH}_3\text{C}(\text{O})\text{OO} + \text{CH}_3\text{O}_2 \rightarrow \text{CH}_3\text{COOH} + \text{HCHO}$                                                                         | $0.1 * 2.0\text{E-}12 * \text{EXP}(500./\text{temp})$                                           | Sander et al. (2011)                             |
| G4216  | TrGC   | $\text{CH}_3\text{C}(\text{O})\text{OO} + \text{C}_2\text{H}_5\text{O}_2 \rightarrow .82 \text{ CH}_3\text{O}_2 + \text{CH}_3\text{CHO} + .82 \text{ HO}_2 + .18 \text{ CH}_3\text{COOH}$ | $4.9\text{E-}12 * \text{EXP}(211./\text{temp})$                                                 | Wallington et al., Kirchner and Stockwell (1996) |
| G4217  | TrGC   | $\text{CH}_3\text{C}(\text{O})\text{OO} + \text{CH}_3\text{C}(\text{O})\text{OO} \rightarrow 2 \text{ CH}_3\text{O}_2 + 2 \text{ CO}_2 + \text{O}_2$                                      | $2.5\text{E-}12 * \text{EXP}(500./\text{temp})$                                                 | Tyndall et al. (2001)                            |
| G4218  | TrGC   | $\text{CH}_3\text{C}(\text{O})\text{OOH} + \text{OH} \rightarrow \text{CH}_3\text{C}(\text{O})\text{OO} + \text{H}_2\text{O}$                                                             | $0.6 * k_{\text{CH300H\_OH}}$                                                                   | Rickard and Pascoe (2009)                        |
| G4219  | TrGCN  | $\text{NACA} + \text{OH} \rightarrow \text{NO}_2 + \text{HCHO} + \text{CO}$                                                                                                               | $5.6\text{E-}12 * \text{EXP}(270./\text{temp})$                                                 | Pöschl et al. (2000)                             |
| G4220  | TrGCN  | $\text{PAN} + \text{OH} \rightarrow \text{HCHO} + \text{CO} + \text{NO}_2 + \text{H}_2\text{O}$                                                                                           | $9.50\text{E-}13 * \text{EXP}(-650./\text{temp})$                                               | Rickard and Pascoe (2009)                        |
| G4221  | TrGCN  | $\text{PAN} \rightarrow \text{CH}_3\text{C}(\text{O})\text{OO} + \text{NO}_2$                                                                                                             | $k_{\text{PAN\_M}}$                                                                             | Sander et al. (2011)*                            |
| G4300  | TrGC   | $\text{C}_3\text{H}_8 + \text{OH} \rightarrow .82 \text{ iC}_3\text{H}_7\text{O}_2 + .18 \text{ C}_2\text{H}_5\text{O}_2 + \text{H}_2\text{O}$                                            | $1.65\text{E-}17 * \text{temp} * \text{temp} * \text{EXP}(-87./\text{temp})$                    | Atkinson (2003)                                  |

Table 1: Gas phase reactions (... continued)

| #     | labels | reaction                                                                                                                                                                                                                                                                                                                                                                               | rate coefficient                                                                       | reference                     |
|-------|--------|----------------------------------------------------------------------------------------------------------------------------------------------------------------------------------------------------------------------------------------------------------------------------------------------------------------------------------------------------------------------------------------|----------------------------------------------------------------------------------------|-------------------------------|
| G4301 | TrGC   | $\text{C}_3\text{H}_6 + \text{O}_3 \rightarrow 1. \text{ LossO3R} + 1. \text{ LossO3} + .57 \text{ HCHO} + .47 \text{ CH}_3\text{CHO} + .33 \text{ OH} + .26 \text{ HO}_2 + .07 \text{ CH}_3\text{O}_2 + .06 \text{ C}_2\text{H}_5\text{O}_2 + .23 \text{ CH}_3\text{C(O)OO} + .04 \text{ MGLYOX} + .06 \text{ CH}_4 + .31 \text{ CO} + .22 \text{ HCOOH} + .03 \text{ CH}_3\text{OH}$ | $6.5\text{E-}15*\text{EXP}(-1900./\text{temp})$                                        | Sander et al. (2011)          |
| G4302 | TrGC   | $\text{C}_3\text{H}_6 + \text{OH} \rightarrow \text{CH}_3\text{CH}(\text{O}_2)\text{CH}_2\text{OH}$                                                                                                                                                                                                                                                                                    | $k_{3\text{rd}}(\text{temp}, \text{cair}, 8.\text{E-}27, 3.5, 3.\text{E-}11, 0., 0.5)$ | Wallington et al.             |
| G4303 | TrGCN  | $\text{C}_3\text{H}_6 + \text{NO}_3 \rightarrow 1. \text{ LossO3R} + 1. \text{ LossO3} + \text{LC4H9NO3}$                                                                                                                                                                                                                                                                              | $4.6\text{E-}13*\text{EXP}(-1155./\text{temp})$                                        | Wallington et al.             |
| G4304 | TrGC   | $\text{iC}_3\text{H}_7\text{O}_2 + \text{HO}_2 \rightarrow \text{iC}_3\text{H}_7\text{OOH}$                                                                                                                                                                                                                                                                                            | $k_{\text{PrO2\_H02}}$                                                                 | Atkinson (1997)               |
| G4305 | TrGCN  | $\text{iC}_3\text{H}_7\text{O}_2 + \text{NO} \rightarrow 1. \text{ ProdO3R} + 1. \text{ ProdO3} + .96 \text{ CH}_3\text{COCH}_3 + .96 \text{ HO}_2 + .96 \text{ NO}_2 + .04 \text{ iC}_3\text{H}_7\text{ONO}_2$                                                                                                                                                                        | $k_{\text{PrO2\_N0}}$                                                                  | Wallington et al.             |
| G4306 | TrGC   | $\text{iC}_3\text{H}_7\text{O}_2 + \text{CH}_3\text{O}_2 \rightarrow \text{CH}_3\text{COCH}_3 + .8 \text{ HCHO} + .8 \text{ HO}_2 + .2 \text{ CH}_3\text{OH}$                                                                                                                                                                                                                          | $k_{\text{PrO2\_CH302}}$                                                               | Kirchner and Stockwell (1996) |
| G4307 | TrGC   | $\text{iC}_3\text{H}_7\text{OOH} + \text{OH} \rightarrow .3 \text{ iC}_3\text{H}_7\text{O}_2 + .7 \text{ CH}_3\text{COCH}_3 + .7 \text{ OH}$                                                                                                                                                                                                                                           | $k_{\text{CH300H\_OH}}$                                                                | see note*                     |
| G4308 | TrGC   | $\text{CH}_3\text{CH}(\text{O}_2)\text{CH}_2\text{OH} + \text{HO}_2 \rightarrow \text{CH}_3\text{CH}(\text{OOH})\text{CH}_2\text{OH}$                                                                                                                                                                                                                                                  | $6.5\text{E-}13*\text{EXP}(650./\text{temp})$                                          | Müller and Brasseur (1995)    |
| G4309 | TrGCN  | $\text{CH}_3\text{CH}(\text{O}_2)\text{CH}_2\text{OH} + \text{NO} \rightarrow 1. \text{ ProdO3R} + 1. \text{ ProdO3} + .98 \text{ CH}_3\text{CHO} + .98 \text{ HCHO} + .98 \text{ HO}_2 + .98 \text{ NO}_2 + .02 \text{ LC4H9NO3}$                                                                                                                                                     | $4.2\text{E-}12*\text{EXP}(180./\text{temp})$                                          | Müller and Brasseur (1995)    |
| G4310 | TrGC   | $\text{CH}_3\text{CH}(\text{OOH})\text{CH}_2\text{OH} + \text{OH} \rightarrow .5 \text{ CH}_3\text{CH}(\text{O}_2)\text{CH}_2\text{OH} + .5 \text{ CH}_3\text{COCH}_2\text{OH} + .5 \text{ OH} + \text{H}_2\text{O}$                                                                                                                                                                   | $3.8\text{E-}12*\text{EXP}(200./\text{temp})$                                          | Müller and Brasseur (1995)    |
| G4311 | TrGC   | $\text{CH}_3\text{COCH}_3 + \text{OH} \rightarrow \text{CH}_3\text{COCH}_2\text{O}_2 + \text{H}_2\text{O}$                                                                                                                                                                                                                                                                             | $1.33\text{E-}13 + 3.82\text{E-}11*\text{EXP}(-2000./\text{temp})$                     | Sander et al. (2011)          |
| G4312 | TrGC   | $\text{CH}_3\text{COCH}_2\text{O}_2 + \text{HO}_2 \rightarrow \text{CH}_3\text{COCH}_2\text{O}_2\text{H}$                                                                                                                                                                                                                                                                              | $8.6\text{E-}13*\text{EXP}(700./\text{temp})$                                          | Tyndall et al. (2001)         |
| G4313 | TrGCN  | $\text{CH}_3\text{COCH}_2\text{O}_2 + \text{NO} \rightarrow 1. \text{ ProdO3R} + 1. \text{ ProdO3} + \text{CH}_3\text{C(O)OO} + \text{HCHO} + \text{NO}_2$                                                                                                                                                                                                                             | $2.9\text{E-}12*\text{EXP}(300./\text{temp})$                                          | Sander et al. (2011)          |
| G4314 | TrGC   | $\text{CH}_3\text{COCH}_2\text{O}_2 + \text{CH}_3\text{O}_2 \rightarrow .5 \text{ MGLYOX} + .5 \text{ CH}_3\text{OH} + .3 \text{ CH}_3\text{C(O)OO} + .8 \text{ HCHO} + .3 \text{ HO}_2 + .2 \text{ CH}_3\text{COCH}_2\text{OH}$                                                                                                                                                       | $7.5\text{E-}13*\text{EXP}(500./\text{temp})$                                          | Tyndall et al. (2001)         |
| G4315 | TrGC   | $\text{CH}_3\text{COCH}_2\text{O}_2\text{H} + \text{OH} \rightarrow .3 \text{ CH}_3\text{COCH}_2\text{O}_2 + .7 \text{ MGLYOX} + .7 \text{ OH}$                                                                                                                                                                                                                                        | $k_{\text{CH300H\_OH}}$                                                                | see note*                     |
| G4316 | TrGC   | $\text{CH}_3\text{COCH}_2\text{OH} + \text{OH} \rightarrow \text{MGLYOX} + \text{HO}_2$                                                                                                                                                                                                                                                                                                | $2.15\text{E-}12*\text{EXP}(305./\text{temp})$                                         | Dillon et al. (2006)          |
| G4317 | TrGC   | $\text{MGLYOX} + \text{OH} \rightarrow \text{CH}_3\text{C(O)OO} + \text{CO}$                                                                                                                                                                                                                                                                                                           | $8.4\text{E-}13*\text{EXP}(830./\text{temp})$                                          | Tyndall et al. (1995)         |
| G4320 | TrGCN  | $\text{iC}_3\text{H}_7\text{ONO}_2 + \text{OH} \rightarrow \text{CH}_3\text{COCH}_3 + \text{NO}_2$                                                                                                                                                                                                                                                                                     | $6.2\text{E-}13*\text{EXP}(-230./\text{temp})$                                         | Wallington et al.             |
| G4400 | TrGC   | $\text{C}_4\text{H}_{10} + \text{OH} \rightarrow \text{LC}_4\text{H}_9\text{O}_2 + \text{H}_2\text{O}$                                                                                                                                                                                                                                                                                 | $1.81\text{E-}17*\text{temp}*\text{temp}*\text{EXP}(114./\text{temp})$                 | Atkinson (2003)               |
| G4401 | TrGC   | $\text{LC}_4\text{H}_9\text{O}_2 + \text{CH}_3\text{O}_2 \rightarrow .88 \text{ MEK} + .68 \text{ HCHO} + 1.23 \text{ HO}_2 + .12 \text{ CH}_3\text{CHO} + .12 \text{ C}_2\text{H}_5\text{O}_2 + .18 \text{ CH}_3\text{OH}$                                                                                                                                                            | $k_{\text{PrO2\_CH302}}$                                                               | see note*                     |



Table 1: Gas phase reactions (... continued)

| #     | labels | reaction                                                                                                                                                                                                                                                                                            | rate coefficient                                                                                       | reference             |
|-------|--------|-----------------------------------------------------------------------------------------------------------------------------------------------------------------------------------------------------------------------------------------------------------------------------------------------------|--------------------------------------------------------------------------------------------------------|-----------------------|
| G4402 | TrGC   | $\text{LC}_4\text{H}_9\text{O}_2 + \text{HO}_2 \rightarrow \text{LC}_4\text{H}_9\text{OOH}$                                                                                                                                                                                                         | $k_{\text{PrO2\_H02}}$                                                                                 | see note*             |
| G4403 | TrGCN  | $\text{LC}_4\text{H}_9\text{O}_2 + \text{NO} \rightarrow 1. \text{ProdO3R} + 1. \text{ProdO3} + .84 \text{NO}_2 + .56 \text{MEK} + .56 \text{HO}_2 + .28 \text{C}_2\text{H}_5\text{O}_2 + .28 \text{CH}_3\text{CHO} + .16 \text{LC}_4\text{H}_9\text{NO}_3$                                         | $k_{\text{PrO2\_N0}}$                                                                                  | see note*             |
| G4404 | TrGC   | $\text{LC}_4\text{H}_9\text{OOH} + \text{OH} \rightarrow .15 \text{LC}_4\text{H}_9\text{O}_2 + .85 \text{MEK} + .85 \text{OH} + .85 \text{H}_2\text{O}$                                                                                                                                             | $k_{\text{CH300H\_OH}}$                                                                                | see note*             |
| G4405 | TrGC   | $\text{MVK} + \text{O}_3 \rightarrow 1. \text{LossO3R} + 1. \text{LossO3} + .45 \text{HCOOH} + .9 \text{MGLYOX} + .1 \text{CH}_3\text{C(O)OO} + .19 \text{OH} + .22 \text{CO} + .32 \text{HO}_2$                                                                                                    | $.5*(1.36\text{E-}15*\text{EXP}(-2112./\text{temp}) + 7.51\text{E-}16*\text{EXP}(-1521./\text{temp}))$ | Pöschl et al. (2000)  |
| G4406 | TrGC   | $\text{MVK} + \text{OH} \rightarrow \text{MVKO2}$                                                                                                                                                                                                                                                   | $.5*(4.1\text{E-}12*\text{EXP}(452./\text{temp}) + 1.9\text{E-}11*\text{EXP}(175./\text{temp}))$       | Pöschl et al. (2000)  |
| G4407 | TrGC   | $\text{MVKO2} + \text{HO}_2 \rightarrow \text{MVKOOH}$                                                                                                                                                                                                                                              | $1.82\text{E-}13*\text{EXP}(1300./\text{temp})$                                                        | Pöschl et al. (2000)  |
| G4408 | TrGCN  | $\text{MVKO2} + \text{NO} \rightarrow 1. \text{ProdO3R} + 1. \text{ProdO3} + \text{NO}_2 + .25 \text{CH}_3\text{C(O)OO} + .25 \text{CH}_3\text{COCH}_2\text{OH} + .75 \text{HCHO} + .25 \text{CO} + .75 \text{HO}_2 + .5 \text{MGLYOX}$                                                             | $2.54\text{E-}12*\text{EXP}(360./\text{temp})$                                                         | Pöschl et al. (2000)  |
| G4409 | TrGCN  | $\text{MVKO2} + \text{NO}_2 \rightarrow \text{MPAN}$                                                                                                                                                                                                                                                | $.25*k_{\text{3rd}}(\text{temp}, \text{cair}, 9.7\text{E-}29, 5.6, 9.3\text{E-}12, 1.5, 0.6)$          | Pöschl et al. (2000)  |
| G4410 | TrGC   | $\text{MVKO2} + \text{CH}_3\text{O}_2 \rightarrow .5 \text{MGLYOX} + .375 \text{CH}_3\text{COCH}_2\text{OH} + .125 \text{CH}_3\text{C(O)OO} + 1.125 \text{HCHO} + .875 \text{HO}_2 + .125 \text{CO} + .25 \text{CH}_3\text{OH}$                                                                     | $2.\text{E-}12$                                                                                        | von Kuhlmann (2001)   |
| G4411 | TrGC   | $\text{MVKO2} + \text{MVKO2} \rightarrow \text{CH}_3\text{COCH}_2\text{OH} + \text{MGLYOX} + .5 \text{CO} + .5 \text{HCHO} + \text{HO}_2$                                                                                                                                                           | $2.\text{E-}12$                                                                                        | Pöschl et al. (2000)  |
| G4412 | TrGC   | $\text{MVKOOH} + \text{OH} \rightarrow \text{MVKO2}$                                                                                                                                                                                                                                                | $3.\text{E-}11$                                                                                        | Pöschl et al. (2000)  |
| G4413 | TrGC   | $\text{MEK} + \text{OH} \rightarrow \text{LMEKO2}$                                                                                                                                                                                                                                                  | $1.3\text{E-}12*\text{EXP}(-25./\text{temp})$                                                          | Wallington et al.     |
| G4414 | TrGC   | $\text{LMEKO2} + \text{HO}_2 \rightarrow \text{LMEKOOH}$                                                                                                                                                                                                                                            | $k_{\text{PrO2\_H02}}$                                                                                 | see note*             |
| G4415 | TrGCN  | $\text{LMEKO2} + \text{NO} \rightarrow 1. \text{ProdO3R} + 1. \text{ProdO3} + .985 \text{CH}_3\text{CHO} + .985 \text{CH}_3\text{C(O)OO} + .985 \text{NO}_2 + .015 \text{LC}_4\text{H}_9\text{NO}_3$                                                                                                | $k_{\text{PrO2\_N0}}$                                                                                  | see note*             |
| G4416 | TrGC   | $\text{LMEKOOH} + \text{OH} \rightarrow .8 \text{BIACET} + .8 \text{OH} + .2 \text{LMEKO2}$                                                                                                                                                                                                         | $k_{\text{CH300H\_OH}}$                                                                                | see note*             |
| G4417 | TrGCN  | $\text{LC}_4\text{H}_9\text{NO}_3 + \text{OH} \rightarrow \text{MEK} + \text{NO}_2 + \text{H}_2\text{O}$                                                                                                                                                                                            | $1.7\text{E-}12$                                                                                       | Wallington et al.     |
| G4418 | TrGCN  | $\text{MPAN} + \text{OH} \rightarrow \text{CH}_3\text{COCH}_2\text{OH} + \text{NO}_2$                                                                                                                                                                                                               | $3.2\text{E-}11$                                                                                       | Orlando et al. (2002) |
| G4419 | TrGCN  | $\text{MPAN} \rightarrow \text{MVKO2} + \text{NO}_2$                                                                                                                                                                                                                                                | $k_{\text{PAN\_M}}$                                                                                    | see note*             |
| G4500 | TrGC   | $\text{C}_5\text{H}_8 + \text{O}_3 \rightarrow 1. \text{LossO3R} + 1. \text{LossO3} + .28 \text{HCOOH} + .65 \text{MVK} + .1 \text{MVKO2} + .1 \text{CH}_3\text{C(O)OO} + .14 \text{CO} + .58 \text{HCHO} + .09 \text{H}_2\text{O}_2 + .08 \text{CH}_3\text{O}_2 + .25 \text{OH} + .25 \text{HO}_2$ | $7.86\text{E-}15*\text{EXP}(-1913./\text{temp})$                                                       | Pöschl et al. (2000)  |

Table 1: Gas phase reactions (... continued)

| #      | labels    | reaction                                                                                                  | rate coefficient                     | reference                                     |
|--------|-----------|-----------------------------------------------------------------------------------------------------------|--------------------------------------|-----------------------------------------------|
| G4501  | TrGC      | $C_5H_8 + OH \rightarrow ISO2$                                                                            | $2.54E-11 \cdot EXP(410./temp)$      | Pöschl et al. (2000)                          |
| G4502  | TrGCN     | $C_5H_8 + NO_3 \rightarrow 1. LossO3R + 1. LossO3 + ISON$                                                 | $3.03E-12 \cdot EXP(-446./temp)$     | Pöschl et al. (2000)                          |
| G4503  | TrGC      | $ISO2 + HO_2 \rightarrow ISOOH$                                                                           | $2.22E-13 \cdot EXP(1300./temp)$     | Boyd et al. (2003)                            |
| G4504  | TrGCN     | $ISO2 + NO \rightarrow 1. ProdO3R + 1. ProdO3 + .956 NO_2 + .956 MVK + .956 HCHO + .956 HO_2 + .044 ISON$ | $2.54E-12 \cdot EXP(360./temp)$      | Pöschl et al. (2000)                          |
| G4505  | TrGC      | $ISO2 + CH_3O_2 \rightarrow .5 MVK + 1.25 HCHO + HO_2 + .25 MGLYOX + .25 CH_3COCH_2OH + .25 CH_3OH$       | 2.E-12                               | von Kuhlmann (2001)                           |
| G4506  | TrGC      | $ISO2 + ISO2 \rightarrow 2 MVK + HCHO + HO_2$                                                             | 2.E-12                               | Pöschl et al. (2000)                          |
| G4507  | TrGC      | $ISOOH + OH \rightarrow MVK + OH$                                                                         | 1.E-10                               | Pöschl et al. (2000)                          |
| G4508  | TrGCN     | $ISON + OH \rightarrow CH_3COCH_2OH + NACA$                                                               | 1.3E-11                              | Pöschl et al. (2000)                          |
| G6100  | UpStTrGCl | $Cl + O_3 \rightarrow ClO + O_2$                                                                          | $2.8E-11 \cdot EXP(-250./temp)$      | Atkinson et al. (2007)                        |
| G6101  | UpStGCl   | $ClO + O(^3P) \rightarrow 2. LossO3Cl + 2. LossO3 + Cl + O_2$                                             | $2.5E-11 \cdot EXP(110./temp)$       | Atkinson et al. (2007)                        |
| G6102a | StTrGCl   | $ClO + ClO \rightarrow 2. LossO3Cl + 2. LossO3 + Cl_2 + O_2$                                              | $1.0E-12 \cdot EXP(-1590./temp)$     | Atkinson et al. (2007)                        |
| G6102b | StTrGCl   | $ClO + ClO \rightarrow 2. LossO3Cl + 2. LossO3 + 2 Cl + O_2$                                              | $3.0E-11 \cdot EXP(-2450./temp)$     | Atkinson et al. (2007)                        |
| G6102c | StTrGCl   | $ClO + ClO \rightarrow 1. LossO3Cl + 1. LossO3 + Cl + OClO$                                               | $3.5E-13 \cdot EXP(-1370./temp)$     | Atkinson et al. (2007)                        |
| G6102d | StTrGCl   | $ClO + ClO \rightarrow Cl_2O_2$                                                                           | k_C10_C10                            | Atkinson et al. (2007)                        |
| G6103  | StTrGCl   | $Cl_2O_2 \rightarrow ClO + ClO$                                                                           | k_C10_C10/(1.72E-27*EXP(8649./temp)) | Atkinson et al. (2007), Sander et al. (2011)* |
| G6200  | StGCl     | $Cl + H_2 \rightarrow HCl + H$                                                                            | tag_kG6200                           | Atkinson et al. (2007)                        |
|        | tag: FHM  | $^{FHM}H_2 + Cl \rightarrow Cl + ^{FHM}HCl + ^{FHM}H + PTLFHMH2$                                          | tag_kG6200                           |                                               |
|        | tag: FHM  | $^{FHM}rH_2 + Cl \rightarrow Cl + ^{FHM}rHCl + ^{FHM}rH + PTLFHM rH2$                                     | tag_kG6200                           |                                               |
| G6201a | StGCl     | $Cl + HO_2 \rightarrow HCl + O_2$                                                                         | tag_kG6201a                          | Atkinson et al. (2007)                        |
|        | tag: FHM  | $^{FHM}HO_2 + Cl \rightarrow Cl + ^{FHM}HCl$                                                              | tag_kG6201a                          |                                               |
|        | tag: FHM  | $^{FHM}rHO_2 + Cl \rightarrow Cl + ^{FHM}rHCl$                                                            | tag_kG6201a                          |                                               |
| G6201b | StGCl     | $Cl + HO_2 \rightarrow ProdO3Cl + ProdO3 + ClO + OH$                                                      | tag_kG6201b                          | Atkinson et al. (2007)                        |
|        | tag: FHM  | $^{FHM}HO_2 + Cl \rightarrow Cl + ^{FHM}OH + PTPFHM OH$                                                   | tag_kG6201b                          |                                               |
|        | tag: FHM  | $^{FHM}rHO_2 + Cl \rightarrow Cl + ^{FHM}rOH + PTPFHM rOH$                                                | tag_kG6201b                          |                                               |
| G6202  | StTrGCl   | $Cl + H_2O_2 \rightarrow HCl + HO_2$                                                                      | tag_kG6202                           | Atkinson et al. (2007)                        |
|        | tag: FHM  | $^{FHM}H_2O_2 + Cl \rightarrow Cl + ^{FHM}HCl + ^{FHM}HO_2$                                               | tag_kG6202                           |                                               |
|        | tag: FHM  | $^{FHM}rH_2O_2 + Cl \rightarrow Cl + ^{FHM}rHCl + ^{FHM}rHO_2$                                            | tag_kG6202                           |                                               |
| G6203  | StGCl     | $ClO + OH \rightarrow LossO3Cl + LossO3 + 0.94 Cl + 0.94 HO_2 + 0.06 HCl + 0.06 O_2$                      | tag_kG6203                           | Atkinson et al. (2007)                        |
|        | tag: FHM  | $^{FHM}OH + ClO \rightarrow ClO + 0.94 ^{FHM}HO_2 + 0.06 ^{FHM}HCl + PTLFHM OH$                           | tag_kG6203                           |                                               |

Table 1: Gas phase reactions (... continued)

| #     | labels     | reaction                                                                                                                                                             | rate coefficient                                                                               | reference                 |
|-------|------------|----------------------------------------------------------------------------------------------------------------------------------------------------------------------|------------------------------------------------------------------------------------------------|---------------------------|
|       | tag: FHM   | ${}^{\text{FHM}}\text{OH} + \text{ClO} \rightarrow \text{ClO} + 0.94 {}^{\text{FHM}}\text{HO}_2 + 0.06 {}^{\text{FHM}}\text{HCl}$<br>+ PTLFHM <sub>r</sub> OH        | tag_kG6203                                                                                     |                           |
| G6204 | StTrGCl    | $\text{ClO} + \text{HO}_2 \rightarrow \text{HOCl} + \text{O}_2$                                                                                                      | tag_kG6204                                                                                     | Atkinson et al. (2007)    |
|       | tag: FHM   | ${}^{\text{FHM}}\text{HO}_2 + \text{ClO} \rightarrow \text{ClO} + {}^{\text{FHM}}\text{HOCl}$                                                                        | tag_kG6204                                                                                     |                           |
|       | tag: FHM   | ${}^{\text{FHM}}\text{HO}_2 + \text{ClO} \rightarrow \text{ClO} + {}^{\text{FHM}}\text{rHOCl}$                                                                       | tag_kG6204                                                                                     |                           |
| G6205 | StTrGCl    | $\text{HCl} + \text{OH} \rightarrow \text{Cl} + \text{H}_2\text{O}$                                                                                                  | tag_kG6205                                                                                     | Atkinson et al. (2007)    |
|       | tag: FHM   | ${}^{\text{FHM}}\text{HCl} + \text{OH} \rightarrow \text{OH} + 0.5 {}^{\text{FHM}}\text{H}_2\text{O} + 0.5 \text{PTPFHMH}_2\text{O}$                                 | tag_kG6205                                                                                     |                           |
|       | tag: FHM   | ${}^{\text{FHM}}\text{rHCl} + \text{OH} \rightarrow \text{OH} + 0.5 {}^{\text{FHM}}\text{rH}_2\text{O} + 0.5 \text{PTPFHMH}_2\text{O}$                               | tag_kG6205                                                                                     |                           |
|       | tag: FHM   | ${}^{\text{FHM}}\text{OH} + \text{HCl} \rightarrow \text{HCl} + 0.5 {}^{\text{FHM}}\text{H}_2\text{O} + 0.5 \text{PTPFHMH}_2\text{O}$<br>+ PTLFHM <sub>r</sub> OH    | tag_kG6205                                                                                     |                           |
|       | tag: FHM   | ${}^{\text{FHM}}\text{rOH} + \text{HCl} \rightarrow \text{HCl} + 0.5 {}^{\text{FHM}}\text{rH}_2\text{O} + 0.5 \text{PTPFHMH}_2\text{O} + \text{PTLFHM}_r\text{OH}$   | tag_kG6205                                                                                     |                           |
| G6206 | StGCl      | $\text{HOCl} + \text{OH} \rightarrow \text{ClO} + \text{H}_2\text{O}$                                                                                                | tag_kG6206                                                                                     | Sander et al. (2011)      |
|       | tag: FHM   | ${}^{\text{FHM}}\text{HOCl} + \text{OH} \rightarrow \text{OH} + 0.5 {}^{\text{FHM}}\text{H}_2\text{O} + 0.5 \text{PTPFHMH}_2\text{O}$                                | tag_kG6206                                                                                     |                           |
|       | tag: FHM   | ${}^{\text{FHM}}\text{rHOCl} + \text{OH} \rightarrow \text{OH} + 0.5 {}^{\text{FHM}}\text{rH}_2\text{O} + 0.5 \text{PTPFHMH}_2\text{O}$                              | tag_kG6206                                                                                     |                           |
|       | tag: FHM   | ${}^{\text{FHM}}\text{OH} + \text{HOCl} \rightarrow \text{HOCl} + 0.5 {}^{\text{FHM}}\text{H}_2\text{O} + 0.5 \text{PTPFHMH}_2\text{O} + \text{PTLFHM}_r\text{OH}$   | tag_kG6206                                                                                     |                           |
|       | tag: FHM   | ${}^{\text{FHM}}\text{rOH} + \text{HOCl} \rightarrow \text{HOCl} + 0.5 {}^{\text{FHM}}\text{rH}_2\text{O} + 0.5 \text{PTPFHMH}_2\text{O} + \text{PTLFHM}_r\text{OH}$ | tag_kG6206                                                                                     |                           |
| G6300 | UpStTrGClN | $\text{ClO} + \text{NO} \rightarrow \text{NO}_2 + \text{Cl}$                                                                                                         | $6.2\text{E}-12 \cdot \text{EXP}(295./\text{temp})$                                            | Atkinson et al. (2007)    |
| G6301 | StTrGClN   | $\text{ClO} + \text{NO}_2 \rightarrow \text{ClNO}_3$                                                                                                                 | $k_{\text{3rd\_iupac}}(\text{temp}, \text{cair}, 1.6\text{E}-31, 3.4, 7.\text{E}-11, 0., 0.4)$ | Atkinson et al. (2007)    |
| G6302 | TrGClN     | $\text{ClNO}_3 \rightarrow \text{ClO} + \text{NO}_2$                                                                                                                 | $6.918\text{E}-7 \cdot \text{EXP}(-10909./\text{temp}) \cdot \text{cair}$                      | Anderson and Fahey (1990) |
| G6303 | StGClN     | $\text{ClNO}_3 + \text{O}(^3\text{P}) \rightarrow \text{ClO} + \text{NO}_3$                                                                                          | $4.5\text{E}-12 \cdot \text{EXP}(-900./\text{temp})$                                           | Atkinson et al. (2007)    |
| G6304 | StTrGClN   | $\text{ClNO}_3 + \text{Cl} \rightarrow \text{Cl}_2 + \text{NO}_3$                                                                                                    | $6.2\text{E}-12 \cdot \text{EXP}(145./\text{temp})$                                            | Atkinson et al. (2007)    |
| G6400 | StTrGCl    | $\text{Cl} + \text{CH}_4 \rightarrow \text{HCl} + \text{CH}_3$                                                                                                       | tag_kG6400                                                                                     | Atkinson et al. (2006)    |
|       | tag: FHM   | ${}^{\text{FHM}}\text{CH}_4 + \text{Cl} \rightarrow \text{Cl} + {}^{\text{FHM}}\text{HCl} + {}^{\text{FHM}}\text{CH}_3 + \text{PTLFHMCH}_4$                          | tag_kG6400                                                                                     |                           |
|       | tag: FHM   | ${}^{\text{FHM}}\text{rCH}_4 + \text{Cl} \rightarrow \text{Cl} + {}^{\text{FHM}}\text{rHCl} + {}^{\text{FHM}}\text{rCH}_3 + \text{PTLFHM}_r\text{CH}_4$              | tag_kG6400                                                                                     |                           |
| G6401 | StTrGCl    | $\text{Cl} + \text{HCHO} \rightarrow \text{HCl} + \text{CO} + \text{HO}_2$                                                                                           | tag_kG6401                                                                                     | Atkinson et al. (2006)    |
|       | tag: FHM   | ${}^{\text{FHM}}\text{HCHO} + \text{Cl} \rightarrow \text{Cl} + {}^{\text{FHM}}\text{HCl} + {}^{\text{FHM}}\text{HO}_2$                                              | tag_kG6401                                                                                     |                           |

Table 1: Gas phase reactions (... continued)

| #     | labels    | reaction                                                                                                                                                                              | rate coefficient | reference              |
|-------|-----------|---------------------------------------------------------------------------------------------------------------------------------------------------------------------------------------|------------------|------------------------|
| G6402 | tag: FHM  | ${}^{\text{FHM}}\text{rHCHO} + \text{Cl} \rightarrow \text{Cl} + {}^{\text{FHM}}\text{rHCl} + {}^{\text{FHM}}\text{rHO}_2$                                                            | tag_kG6401       | Atkinson et al. (2006) |
|       | StTrGCl   | $\text{Cl} + \text{CH}_3\text{OOH} \rightarrow \text{HCHO} + \text{HCl} + \text{OH}$                                                                                                  | tag_kG6402       |                        |
|       | tag: FHM  | ${}^{\text{FHM}}\text{CH}_3\text{OOH} + \text{Cl} \rightarrow \text{Cl} + {}^{\text{FHM}}\text{HCHO} + {}^{\text{FHM}}\text{HCl} + {}^{\text{FHM}}\text{OH} + \text{PTPFHMOH}$        | tag_kG6402       |                        |
|       | tag: FHM  | ${}^{\text{FHM}}\text{rCH}_3\text{OOH} + \text{Cl} \rightarrow \text{Cl} + {}^{\text{FHM}}\text{rHCHO} + {}^{\text{FHM}}\text{rHCl} + {}^{\text{FHM}}\text{rOH} + \text{PTPFHMrOH}$   | tag_kG6402       |                        |
| G6403 | StTrGCl   | $\text{ClO} + \text{CH}_3\text{O}_2 \rightarrow \text{LossO3Cl} + \text{LossO3} + \text{HO}_2 + \text{Cl} + \text{HCHO}$                                                              | tag_kG6403       | Sander et al. (2011)   |
|       | tag: FHM  | ${}^{\text{FHM}}\text{CH}_3\text{O}_2 + \text{ClO} \rightarrow \text{ClO} + {}^{\text{FHM}}\text{HO}_2 + {}^{\text{FHM}}\text{HCHO}$                                                  | tag_kG6403       |                        |
|       | tag: FHM  | ${}^{\text{FHM}}\text{rCH}_3\text{O}_2 + \text{ClO} \rightarrow \text{ClO} + {}^{\text{FHM}}\text{rHO}_2 + {}^{\text{FHM}}\text{rHCHO}$                                               | tag_kG6403       |                        |
| G6404 | StGCl     | $\text{CCl}_4 + \text{O}(^1\text{D}) \rightarrow 4.0 \text{ ProdLCl} + \text{LCARBON} + \text{ClO} + 3 \text{ Cl}$                                                                    | 3.3E-10          | Sander et al. (2011)   |
| G6405 | StGCl     | $\text{CH}_3\text{Cl} + \text{O}(^1\text{D}) \rightarrow 2 \text{ LHYDROGEN} + \text{ProdLCl} + \text{LossO3Cl} + \text{LossO3} + \text{LCARBON} + \text{OH} + \text{Cl}$             | tag_kG6405       |                        |
|       | transfer: | $\text{CH}_3\text{Cl} \rightarrow \text{OH}$                                                                                                                                          |                  |                        |
|       | tag: FHM  | $\text{O}(^1\text{D}) + {}^{\text{FHM}}\text{CH}_3\text{Cl} \rightarrow \text{O}(^1\text{D}) + {}^{\text{FHM}}\text{OH} + \text{PTPFHMOH}$                                            | tag_kG6405       |                        |
|       | tag: FHM  | $\text{O}(^1\text{D}) + {}^{\text{FHM}}\text{rCH}_3\text{Cl} \rightarrow \text{O}(^1\text{D}) + {}^{\text{FHM}}\text{rOH} + \text{PTPFHMrOH}$                                         | tag_kG6405       |                        |
| G6406 | StGCl     | $\text{CH}_3\text{Cl} + \text{OH} \rightarrow 2 \text{ LHYDROGEN} + \text{ProdLCl} + \text{LCARBON} + \text{H}_2\text{O} + \text{Cl}$                                                 | tag_kG6406       | Sander et al. (2011)   |
|       | transfer: | $\text{OH} \rightarrow \text{H}_2\text{O}$                                                                                                                                            |                  |                        |
|       | tag: FHM  | $\text{CH}_3\text{Cl} + {}^{\text{FHM}}\text{OH} \rightarrow \text{CH}_3\text{Cl} + {}^{\text{FHM}}\text{H}_2\text{O} + \text{PTPFHMH}_2\text{O} + \text{PTLFHMOH}$                   | tag_kG6406       |                        |
|       | tag: FHM  | $\text{CH}_3\text{Cl} + {}^{\text{FHM}}\text{rOH} \rightarrow \text{CH}_3\text{Cl} + {}^{\text{FHM}}\text{rH}_2\text{O} + \text{PTPFHMrH}_2\text{O} + \text{PTLFHMrOH}$               | tag_kG6406       |                        |
|       | transfer: | $\text{CH}_3\text{Cl} \rightarrow$                                                                                                                                                    |                  |                        |
|       | tag: FHM  | $\text{OH} + {}^{\text{FHM}}\text{CH}_3\text{Cl} \rightarrow \text{OH} + \text{Dummy}$                                                                                                | tag_kG6406       |                        |
| G6407 | tag: FHM  | $\text{OH} + {}^{\text{FHM}}\text{rCH}_3\text{Cl} \rightarrow \text{OH} + \text{Dummy}$                                                                                               | tag_kG6406       |                        |
|       | StGCCl    | $\text{CH}_3\text{CCl}_3 + \text{O}(^1\text{D}) \rightarrow 2 \text{ LHYDROGEN} + 3 \text{ ProdLCl} + \text{LossO3Cl} + \text{LossO3} + 2 \text{ LCARBON} + \text{OH} + 3 \text{ Cl}$ | tag_kG6407       |                        |
|       | transfer: | $\text{CH}_3\text{CCl}_3 \rightarrow \text{OH}$                                                                                                                                       |                  |                        |
|       | tag: FHM  | $\text{O}(^1\text{D}) + {}^{\text{FHM}}\text{CH}_3\text{CCl}_3 \rightarrow \text{O}(^1\text{D}) + {}^{\text{FHM}}\text{OH} + \text{PTPFHMOH}$                                         | tag_kG6407       |                        |
|       | tag: FHM  | $\text{O}(^1\text{D}) + {}^{\text{FHM}}\text{rCH}_3\text{CCl}_3 \rightarrow \text{O}(^1\text{D}) + {}^{\text{FHM}}\text{rOH} + \text{PTPFHMrOH}$                                      | tag_kG6407       |                        |
|       |           |                                                                                                                                                                                       |                  |                        |

Table 1: Gas phase reactions (... continued)

| #      | labels    | reaction                                                                                                                                                                        | rate coefficient                                                                                 | reference              |
|--------|-----------|---------------------------------------------------------------------------------------------------------------------------------------------------------------------------------|--------------------------------------------------------------------------------------------------|------------------------|
| G6408  | StTrGCCl  | $\text{CH}_3\text{CCl}_3 + \text{OH} \rightarrow 2 \text{ LHYDROGEN} + 3 \text{ ProdLCl} + 2 \text{ LCARBON} + \text{H}_2\text{O} + 3 \text{ Cl}$                               | tag_kG6408                                                                                       | Sander et al. (2011)   |
|        | transfer: | $\text{OH} \rightarrow \text{H}_2\text{O}$                                                                                                                                      |                                                                                                  |                        |
|        | tag: FHM  | $\text{CH}_3\text{CCl}_3 + {}^{\text{FHM}}\text{OH} \rightarrow \text{CH}_3\text{CCl}_3 + {}^{\text{FHM}}\text{H}_2\text{O} + \text{PTPFHMH}_2\text{O} + \text{PTLFHMOH}$       | tag_kG6408                                                                                       |                        |
|        | tag: FHM  | $\text{CH}_3\text{CCl}_3 + {}^{\text{FHM}_r}\text{OH} \rightarrow \text{CH}_3\text{CCl}_3 + {}^{\text{FHM}_r}\text{H}_2\text{O} + \text{PTPFHMrH}_2\text{O} + \text{PTLFHMrOH}$ | tag_kG6408                                                                                       |                        |
|        | transfer: | $\text{CH}_3\text{CCl}_3 \rightarrow$                                                                                                                                           |                                                                                                  |                        |
|        | tag: FHM  | $\text{OH} + {}^{\text{FHM}}\text{CH}_3\text{CCl}_3 \rightarrow \text{OH} + \text{Dummy}$                                                                                       | tag_kG6408                                                                                       |                        |
|        | tag: FHM  | $\text{OH} + {}^{\text{FHM}_r}\text{CH}_3\text{CCl}_3 \rightarrow \text{OH} + \text{Dummy}$                                                                                     | tag_kG6408                                                                                       |                        |
| G6409  | TrGCCl    | $\text{Cl} + \text{C}_2\text{H}_4 \rightarrow 1.6666669 \text{ PHYDROGEN} + .6666667 \text{ CH}_3\text{CH}(\text{O}_2)\text{CH}_2\text{OH} + \text{HCl}$                        | $\text{k\_3rd\_iupac}(\text{temp}, \text{cair}, 1.85\text{E-}29, 3.3, 6.0\text{E-}10, 0.0, 0.4)$ | Atkinson et al. (2006) |
| G6410  | TrGCCl    | $\text{Cl} + \text{CH}_3\text{CHO} \rightarrow \text{HCl} + \text{CH}_3\text{C}(\text{O})\text{OO}$                                                                             | $8.0\text{e-}11$                                                                                 | Atkinson et al. (2006) |
| G6500  | StGCIF    | $\text{CF}_2\text{Cl}_2 + \text{O}(^1\text{D}) \rightarrow 2.0 \text{ ProdLCl} + \text{LCARBON} + 2 \text{ LFLUORINE} + \text{ClO} + \text{Cl}$                                 | $1.4\text{E-}10$                                                                                 | Sander et al. (2011)   |
| G6501  | StGCIF    | $\text{CFCl}_3 + \text{O}(^1\text{D}) \rightarrow 3.0 \text{ ProdLCl} + \text{LCARBON} + 2 \text{ LFLUORINE} + \text{ClO} + 2 \text{ Cl}$                                       | $2.3\text{E-}10$                                                                                 | Sander et al. (2011)   |
| G7100  | StTrGBr   | $\text{Br} + \text{O}_3 \rightarrow \text{BrO} + \text{O}_2$                                                                                                                    | $1.7\text{E-}11 * \text{EXP}(-800./\text{temp})$                                                 | Atkinson et al. (2007) |
| G7101  | StGBr     | $\text{BrO} + \text{O}(^3\text{P}) \rightarrow 2. \text{ LossO3Br} + 2. \text{ LossO3} + \text{Br} + \text{O}_2$                                                                | $1.9\text{E-}11 * \text{EXP}(230./\text{temp})$                                                  | Atkinson et al. (2007) |
| G7102a | StTrGBr   | $\text{BrO} + \text{BrO} \rightarrow 2. \text{ LossO3Br} + 2. \text{ LossO3} + 2 \text{ Br} + \text{O}_2$                                                                       | $2.7\text{E-}12$                                                                                 | Atkinson et al. (2007) |
| G7102b | StTrGBr   | $\text{BrO} + \text{BrO} \rightarrow 2. \text{ LossO3Br} + 2. \text{ LossO3} + \text{Br}_2 + \text{O}_2$                                                                        | $2.9\text{E-}14 * \text{EXP}(840./\text{temp})$                                                  | Atkinson et al. (2007) |
| G7200  | StTrGBr   | $\text{Br} + \text{HO}_2 \rightarrow \text{HBr} + \text{O}_2$                                                                                                                   | tag_kG7200                                                                                       | Atkinson et al. (2007) |
|        | tag: FHM  | ${}^{\text{FHM}}\text{HO}_2 + \text{Br} \rightarrow \text{Br} + {}^{\text{FHM}}\text{HBr}$                                                                                      | tag_kG7200                                                                                       |                        |
|        | tag: FHM  | ${}^{\text{FHM}_r}\text{HO}_2 + \text{Br} \rightarrow \text{Br} + {}^{\text{FHM}_r}\text{HBr}$                                                                                  | tag_kG7200                                                                                       |                        |
| G7201  | StTrGBr   | $\text{BrO} + \text{HO}_2 \rightarrow \text{HOBr} + \text{O}_2$                                                                                                                 | tag_kG7201                                                                                       | Atkinson et al. (2007) |
|        | tag: FHM  | ${}^{\text{FHM}}\text{HO}_2 + \text{BrO} \rightarrow \text{BrO} + {}^{\text{FHM}}\text{HOBr}$                                                                                   | tag_kG7201                                                                                       |                        |
|        | tag: FHM  | ${}^{\text{FHM}_r}\text{HO}_2 + \text{BrO} \rightarrow \text{BrO} + {}^{\text{FHM}_r}\text{HOBr}$                                                                               | tag_kG7201                                                                                       |                        |
| G7202  | StTrGBr   | $\text{HBr} + \text{OH} \rightarrow \text{Br} + \text{H}_2\text{O}$                                                                                                             | tag_kG7202                                                                                       | Atkinson et al. (2007) |
|        | tag: FHM  | ${}^{\text{FHM}}\text{HBr} + \text{OH} \rightarrow \text{OH} + 0.5 {}^{\text{FHM}}\text{H}_2\text{O} + 0.5 \text{ PTPFHMH}_2\text{O}$                                           | tag_kG7202                                                                                       |                        |
|        | tag: FHM  | ${}^{\text{FHM}_r}\text{HBr} + \text{OH} \rightarrow \text{OH} + 0.5 {}^{\text{FHM}_r}\text{H}_2\text{O} + 0.5 \text{ PTPFHMrH}_2\text{O}$                                      | tag_kG7202                                                                                       |                        |
|        | tag: FHM  | ${}^{\text{FHM}}\text{OH} + \text{HBr} \rightarrow \text{HBr} + 0.5 {}^{\text{FHM}}\text{H}_2\text{O} + 0.5 \text{ PTPFHMH}_2\text{O} + \text{PTLFHMOH}$                        | tag_kG7202                                                                                       |                        |
|        | tag: FHM  | ${}^{\text{FHM}_r}\text{OH} + \text{HBr} \rightarrow \text{HBr} + 0.5 {}^{\text{FHM}_r}\text{H}_2\text{O} + 0.5 \text{ PTPFHMrH}_2\text{O} + \text{PTLFHMrOH}$                  | tag_kG7202                                                                                       |                        |

Table 1: Gas phase reactions (... continued)

| #      | labels    | reaction                                                                                                                                                                               | rate coefficient                                                  | reference                                              |
|--------|-----------|----------------------------------------------------------------------------------------------------------------------------------------------------------------------------------------|-------------------------------------------------------------------|--------------------------------------------------------|
| G7203  | StGBr     | $\text{HOBr} + \text{O}(^3\text{P}) \rightarrow \text{LossO3Br} + \text{LossO3} + \text{OH} + \text{BrO}$                                                                              | tag_kG7203                                                        | Atkinson et al. (2007)                                 |
|        | tag: FHM  | $^{\text{FHM}}\text{HOBr} + \text{O}(^3\text{P}) \rightarrow \text{O}(^3\text{P}) + ^{\text{FHM}}\text{OH} + \text{PTPFHMOH}$                                                          | tag_kG7203                                                        |                                                        |
|        | tag: FHM  | $^{\text{FHM}_r}\text{HOBr} + \text{O}(^3\text{P}) \rightarrow \text{O}(^3\text{P}) + ^{\text{FHM}_r}\text{OH} + \text{PTPFHMrOH}$                                                     | tag_kG7203                                                        |                                                        |
| G7204  | StTrGBr   | $\text{Br}_2 + \text{OH} \rightarrow \text{ProdO3Br} + \text{ProdO3} + \text{HOBr} + \text{Br}$                                                                                        | tag_kG7204                                                        | Atkinson et al. (2007)                                 |
|        | tag: FHM  | $^{\text{FHM}}\text{OH} + \text{Br}_2 \rightarrow \text{Br}_2 + ^{\text{FHM}}\text{HOBr} + \text{PTLFHMOH}$                                                                            | tag_kG7204                                                        |                                                        |
|        | tag: FHM  | $^{\text{FHM}_r}\text{OH} + \text{Br}_2 \rightarrow \text{Br}_2 + ^{\text{FHM}_r}\text{HOBr} + \text{PTLFHMrOH}$                                                                       | tag_kG7204                                                        |                                                        |
| G7300  | TrGBrN    | $\text{Br} + \text{BrNO}_3 \rightarrow \text{Br}_2 + \text{NO}_3$                                                                                                                      | 4.9E-11                                                           | Orlando and Tyndall (1996)                             |
| G7301  | StTrGBrN  | $\text{BrO} + \text{NO} \rightarrow \text{Br} + \text{NO}_2$                                                                                                                           | 8.7E-12*EXP(260./temp)                                            | Atkinson et al. (2007)                                 |
| G7302  | StTrGBrN  | $\text{BrO} + \text{NO}_2 \rightarrow \text{BrNO}_3$                                                                                                                                   | k_BrO_NO2                                                         | Atkinson et al. (2007)*                                |
| G7303  | TrGBrN    | $\text{BrNO}_3 \rightarrow \text{BrO} + \text{NO}_2$                                                                                                                                   | k_BrO_NO2/(5.44E-9*EXP(14192./temp)*1.E6*R_gas*temp/(atm2Pa*N_A)) | Orlando and Tyndall (1996),<br>Atkinson et al. (2007)* |
| G7400  | StTrGBr   | $\text{Br} + \text{HCHO} \rightarrow \text{HBr} + \text{CO} + \text{HO}_2$                                                                                                             | tag_kG7400                                                        | Atkinson et al. (2006)                                 |
|        | tag: FHM  | $^{\text{FHM}}\text{HCHO} + \text{Br} \rightarrow \text{Br} + ^{\text{FHM}}\text{HBr} + ^{\text{FHM}}\text{HO}_2$                                                                      | tag_kG7400                                                        |                                                        |
|        | tag: FHM  | $^{\text{FHM}_r}\text{HCHO} + \text{Br} \rightarrow \text{Br} + ^{\text{FHM}_r}\text{HBr} + ^{\text{FHM}_r}\text{HO}_2$                                                                | tag_kG7400                                                        |                                                        |
| G7401  | TrGBr     | $\text{Br} + \text{CH}_3\text{OOH} \rightarrow \text{CH}_3\text{O}_2 + \text{HBr}$                                                                                                     | tag_kG7401                                                        | Kondo and Benson (1984)                                |
|        | tag: FHM  | $^{\text{FHM}}\text{CH}_3\text{OOH} + \text{Br} \rightarrow \text{Br} + ^{\text{FHM}}\text{CH}_3\text{O}_2 + ^{\text{FHM}}\text{HBr}$                                                  | tag_kG7401                                                        |                                                        |
|        | tag: FHM  | $^{\text{FHM}_r}\text{CH}_3\text{OOH} + \text{Br} \rightarrow \text{Br} + ^{\text{FHM}_r}\text{CH}_3\text{O}_2 + ^{\text{FHM}_r}\text{HBr}$                                            | tag_kG7401                                                        |                                                        |
| G7402a | TrGBr     | $\text{BrO} + \text{CH}_3\text{O}_2 \rightarrow \text{HOBr} + \text{HCHO}$                                                                                                             | tag_kG7402a                                                       | Aranda et al. (1997)                                   |
|        | tag: FHM  | $^{\text{FHM}}\text{CH}_3\text{O}_2 + \text{BrO} \rightarrow \text{BrO} + ^{\text{FHM}}\text{HOBr} + ^{\text{FHM}}\text{HCHO}$                                                         | tag_kG7402a                                                       |                                                        |
|        | tag: FHM  | $^{\text{FHM}_r}\text{CH}_3\text{O}_2 + \text{BrO} \rightarrow \text{BrO} + ^{\text{FHM}_r}\text{HOBr} + ^{\text{FHM}_r}\text{HCHO}$                                                   | tag_kG7402a                                                       |                                                        |
| G7402b | TrGBr     | $\text{BrO} + \text{CH}_3\text{O}_2 \rightarrow \text{LossO3Br} + \text{LossO3} + \text{Br} + \text{HCHO} + \text{HO}_2$                                                               | tag_kG7402b                                                       | Aranda et al. (1997)                                   |
|        | tag: FHM  | $^{\text{FHM}}\text{CH}_3\text{O}_2 + \text{BrO} \rightarrow \text{BrO} + ^{\text{FHM}}\text{HCHO} + ^{\text{FHM}}\text{HO}_2$                                                         | tag_kG7402b                                                       |                                                        |
|        | tag: FHM  | $^{\text{FHM}_r}\text{CH}_3\text{O}_2 + \text{BrO} \rightarrow \text{BrO} + ^{\text{FHM}_r}\text{HCHO} + ^{\text{FHM}_r}\text{HO}_2$                                                   | tag_kG7402b                                                       |                                                        |
| G7403  | StTrGBr   | $\text{CH}_3\text{Br} + \text{OH} \rightarrow 2 \text{ LHYDROGEN} + \text{ProdLBr} + \text{LCARBON} + \text{H}_2\text{O} + \text{Br}$                                                  | tag_kG7403                                                        | Sander et al. (2011)                                   |
|        | transfer: | $\text{OH} \rightarrow 0.5 \text{ H}_2\text{O}$                                                                                                                                        |                                                                   |                                                        |
|        | tag: FHM  | $\text{CH}_3\text{Br} + ^{\text{FHM}}\text{OH} \rightarrow \text{CH}_3\text{Br} + 0.5 ^{\text{FHM}}\text{H}_2\text{O} + 0.5 \text{ PTPFHMH}_2\text{O} + \text{PTLFHMOH}$               | tag_kG7403                                                        |                                                        |
|        | tag: FHM  | $\text{CH}_3\text{Br} + ^{\text{FHM}_r}\text{OH} \rightarrow \text{CH}_3\text{Br} + 0.5 ^{\text{FHM}_r}\text{H}_2\text{O} + 0.5 \text{ PTPFHM}_r\text{H}_2\text{O} + \text{PTLFHMrOH}$ | tag_kG7403                                                        |                                                        |
|        | transfer: | $\text{CH}_3\text{Br} \rightarrow 0.5 \text{ H}_2\text{O}$                                                                                                                             |                                                                   |                                                        |
|        | tag: FHM  | $\text{OH} + ^{\text{FHM}}\text{CH}_3\text{Br} \rightarrow \text{OH} + 0.5 ^{\text{FHM}}\text{H}_2\text{O} + 0.5 \text{ PTPFHMH}_2\text{O}$                                            | tag_kG7403                                                        |                                                        |

Table 1: Gas phase reactions (... continued)

| #      | labels    | reaction                                                                                                                                                                                           | rate coefficient                                                                                                          | reference               |
|--------|-----------|----------------------------------------------------------------------------------------------------------------------------------------------------------------------------------------------------|---------------------------------------------------------------------------------------------------------------------------|-------------------------|
|        | tag: FHM  | $\text{OH} + {}^{\text{FHM}}\text{rCH}_3\text{Br} \rightarrow \text{OH} + 0.5 {}^{\text{FHM}}\text{rH}_2\text{O} + 0.5 \text{ PTPFHM}\text{rH}_2\text{O}$                                          | tag_kG7403                                                                                                                |                         |
| G7404  | TrGBrC    | $\text{Br} + \text{C}_2\text{H}_4 \rightarrow 1.6666669 \text{ PHYDROGEN} + .6666667 \text{ CH}_3\text{CH}(\text{O}_2)\text{CH}_2\text{OH} + \text{HBr}$                                           | $2.8\text{E}-13*\text{EXP}(224./\text{temp})/(1.+1.13\text{E}24*\text{EXP}(-3200./\text{temp})/\text{C}(\text{ind\_02}))$ | Atkinson et al. (2006)  |
| G7405  | TrGBrC    | $\text{Br} + \text{CH}_3\text{CHO} \rightarrow \text{HBr} + \text{CH}_3\text{C}(\text{O})\text{OO}$                                                                                                | $1.8\text{e}-11*\text{EXP}(-460./\text{temp})$                                                                            | Atkinson et al. (2006)  |
| G7407  | TrGBr     | $\text{CHBr}_3 + \text{OH} \rightarrow 3 \text{ ProdSBr} + \text{LCARBON} + \text{H}_2\text{O} + 3 \text{ Br}$                                                                                     | tag_kG7407                                                                                                                | Sander et al. (2011)    |
|        | transfer: | $\text{OH} \rightarrow 0.5 \text{ H}_2\text{O}$                                                                                                                                                    |                                                                                                                           |                         |
|        | tag: FHM  | $\text{CHBr}_3 + {}^{\text{FHM}}\text{OH} \rightarrow \text{CHBr}_3 + 0.5 {}^{\text{FHM}}\text{H}_2\text{O} + 0.5 \text{ PTPFHM}\text{H}_2\text{O} + \text{PTLFHM}\text{OH}$                       | tag_kG7407                                                                                                                |                         |
|        | tag: FHM  | $\text{CHBr}_3 + {}^{\text{FHM}}\text{rOH} \rightarrow \text{CHBr}_3 + 0.5 {}^{\text{FHM}}\text{rH}_2\text{O} + 0.5 \text{ PTPFHM}\text{rH}_2\text{O} + \text{PTLFHM}\text{rOH}$                   | tag_kG7407                                                                                                                |                         |
|        | transfer: | $\text{CHBr}_3 \rightarrow 0.5 \text{ H}_2\text{O}$                                                                                                                                                |                                                                                                                           |                         |
|        | tag: FHM  | $\text{OH} + {}^{\text{FHM}}\text{CHBr}_3 \rightarrow \text{OH} + 0.5 {}^{\text{FHM}}\text{H}_2\text{O} + 0.5 \text{ PTPFHM}\text{H}_2\text{O}$                                                    | tag_kG7407                                                                                                                |                         |
|        | tag: FHM  | $\text{OH} + {}^{\text{FHM}}\text{rCHBr}_3 \rightarrow \text{OH} + 0.5 {}^{\text{FHM}}\text{rH}_2\text{O} + 0.5 \text{ PTPFHM}\text{rH}_2\text{O}$                                                 | tag_kG7407                                                                                                                |                         |
| G7408  | TrGBr     | $\text{CH}_2\text{Br}_2 + \text{OH} \rightarrow \text{LHYDROGEN} + 2 \text{ ProdSBr} + \text{LCARBON} + \text{H}_2\text{O} + 2 \text{ Br}$                                                         | tag_kG7408                                                                                                                | Sander et al. (2011)    |
|        | transfer: | $\text{OH} \rightarrow 0.5 \text{ H}_2\text{O}$                                                                                                                                                    |                                                                                                                           |                         |
|        | tag: FHM  | $\text{CH}_2\text{Br}_2 + {}^{\text{FHM}}\text{OH} \rightarrow \text{CH}_2\text{Br}_2 + 0.5 {}^{\text{FHM}}\text{H}_2\text{O} + 0.5 \text{ PTPFHM}\text{H}_2\text{O} + \text{PTLFHM}\text{OH}$     | tag_kG7408                                                                                                                |                         |
|        | tag: FHM  | $\text{CH}_2\text{Br}_2 + {}^{\text{FHM}}\text{rOH} \rightarrow \text{CH}_2\text{Br}_2 + 0.5 {}^{\text{FHM}}\text{rH}_2\text{O} + 0.5 \text{ PTPFHM}\text{rH}_2\text{O} + \text{PTLFHM}\text{rOH}$ | tag_kG7408                                                                                                                |                         |
|        | transfer: | $\text{CH}_2\text{Br}_2 \rightarrow 0.5 \text{ H}_2\text{O}$                                                                                                                                       |                                                                                                                           |                         |
|        | tag: FHM  | $\text{OH} + {}^{\text{FHM}}\text{CH}_2\text{Br}_2 \rightarrow \text{OH} + 0.5 {}^{\text{FHM}}\text{H}_2\text{O} + 0.5 \text{ PTPFHM}\text{H}_2\text{O}$                                           | tag_kG7408                                                                                                                |                         |
|        | tag: FHM  | $\text{OH} + {}^{\text{FHM}}\text{rCH}_2\text{Br}_2 \rightarrow \text{OH} + 0.5 {}^{\text{FHM}}\text{rH}_2\text{O} + 0.5 \text{ PTPFHM}\text{rH}_2\text{O}$                                        | tag_kG7408                                                                                                                |                         |
| G7600  | TrGBrCl   | $\text{Br} + \text{BrCl} \rightarrow \text{Br}_2 + \text{Cl}$                                                                                                                                      | 3.32E-15                                                                                                                  | Manion et al. (2015)    |
| G7601  | TrGBrCl   | $\text{Br} + \text{Cl}_2 \rightarrow \text{BrCl} + \text{Cl}$                                                                                                                                      | 1.10E-15                                                                                                                  | Dolson and Leone (1987) |
| G7602  | TrGBrCl   | $\text{Br}_2 + \text{Cl} \rightarrow \text{BrCl} + \text{Br}$                                                                                                                                      | $2.3\text{E}-10*\text{EXP}(135./\text{temp})$                                                                             | Bedjanian et al. (1998) |
| G7603a | StTrGBrCl | $\text{BrO} + \text{ClO} \rightarrow 0.5 \text{ LossO3Br} + 0.5 \text{ LossO3Cl} + 1. \text{ LossO3} + \text{Br} + \text{OCIO}$                                                                    | $1.6\text{E}-12*\text{EXP}(430./\text{temp})$                                                                             | Atkinson et al. (2007)  |

Table 1: Gas phase reactions (... continued)

| #      | labels    | reaction                                                                                                                                                                                                         | rate coefficient                                    | reference              |
|--------|-----------|------------------------------------------------------------------------------------------------------------------------------------------------------------------------------------------------------------------|-----------------------------------------------------|------------------------|
| G7603b | StTrGBrCl | $\text{BrO} + \text{ClO} \rightarrow 1. \text{ LossO3Br} + 1. \text{ LossO3Cl} + 2. \text{ LossO3}$<br>$+ \text{Br} + \text{Cl} + \text{O}_2$                                                                    | $2.9\text{E-}12 \cdot \text{EXP}(220./\text{temp})$ | Atkinson et al. (2007) |
| G7603c | StTrGBrCl | $\text{BrO} + \text{ClO} \rightarrow 1. \text{ LossO3Br} + 1. \text{ LossO3Cl} + 2. \text{ LossO3}$<br>$+ \text{BrCl} + \text{O}_2$                                                                              | $5.8\text{E-}13 \cdot \text{EXP}(170./\text{temp})$ | Atkinson et al. (2007) |
| G7604  | TrGBrCl   | $\text{BrCl} + \text{Cl} \rightarrow \text{Br} + \text{Cl}_2$                                                                                                                                                    | 1.45E-11                                            | Clyne and Cruse (1972) |
| G7605  | TrGBrCl   | $\text{CHCl}_2\text{Br} + \text{OH} \rightarrow \text{ProdSBr} + \text{LCARBON} + 2$<br>$\text{LCHLORINE} + \text{H}_2\text{O} + \text{Br}$                                                                      | tag_kG7605                                          |                        |
|        | transfer: | $\text{OH} \rightarrow 0.5 \text{ H}_2\text{O}$                                                                                                                                                                  |                                                     |                        |
|        | tag: FHM  | $\text{CHCl}_2\text{Br} + {}^{\text{FHM}}\text{OH} \rightarrow \text{CHCl}_2\text{Br} + 0.5 {}^{\text{FHM}}\text{H}_2\text{O} + 0.5$<br>$\text{PTPFHMH}_2\text{O} + \text{PTLFHMOH}$                             | tag_kG7605                                          |                        |
|        | tag: FHM  | $\text{CHCl}_2\text{Br} + {}^{\text{FHM}_r}\text{OH} \rightarrow \text{CHCl}_2\text{Br} + 0.5 {}^{\text{FHM}_r}\text{H}_2\text{O} + 0.5$<br>$\text{PTPFHMrH}_2\text{O} + \text{PTLFHMrOH}$                       | tag_kG7605                                          |                        |
|        | transfer: | $\text{CHCl}_2\text{Br} \rightarrow 0.5 \text{ H}_2\text{O}$                                                                                                                                                     |                                                     |                        |
|        | tag: FHM  | $\text{OH} + {}^{\text{FHM}}\text{CHCl}_2\text{Br} \rightarrow \text{OH} + 0.5 {}^{\text{FHM}}\text{H}_2\text{O} + 0.5$<br>$\text{PTPFHMH}_2\text{O}$                                                            | tag_kG7605                                          |                        |
|        | tag: FHM  | $\text{OH} + {}^{\text{FHM}_r}\text{CHCl}_2\text{Br} \rightarrow \text{OH} + 0.5 {}^{\text{FHM}_r}\text{H}_2\text{O} + 0.5$<br>$\text{PTPFHMrH}_2\text{O}$                                                       | tag_kG7605                                          |                        |
| G7606  | TrGBrCl   | $\text{CHClBr}_2 + \text{OH} \rightarrow 2 \text{ ProdSBr} + \text{LCARBON} +$<br>$\text{LCHLORINE} + \text{H}_2\text{O} + 2 \text{ Br}$                                                                         | tag_kG7606                                          |                        |
|        | tag: FHM  | ${}^{\text{FHM}}\text{CHClBr}_2 + \text{OH} \rightarrow \text{OH} + 0.5 {}^{\text{FHM}}\text{H}_2\text{O} + 0.5$<br>$\text{PTPFHMH}_2\text{O}$                                                                   | tag_kG7606                                          |                        |
|        | tag: FHM  | ${}^{\text{FHM}_r}\text{CHClBr}_2 + \text{OH} \rightarrow \text{OH} + 0.5 {}^{\text{FHM}_r}\text{H}_2\text{O} + 0.5$<br>$\text{PTPFHMrH}_2\text{O}$                                                              | tag_kG7606                                          |                        |
|        | tag: FHM  | ${}^{\text{FHM}}\text{OH} + \text{CHClBr}_2 \rightarrow \text{CHClBr}_2 + 0.5 {}^{\text{FHM}}\text{H}_2\text{O} + 0.5$<br>$\text{PTPFHMH}_2\text{O} + \text{PTLFHMOH}$                                           | tag_kG7606                                          |                        |
|        | tag: FHM  | ${}^{\text{FHM}_r}\text{OH} + \text{CHClBr}_2 \rightarrow \text{CHClBr}_2 + 0.5 {}^{\text{FHM}_r}\text{H}_2\text{O} + 0.5$<br>$\text{PTPFHMrH}_2\text{O} + \text{PTLFHMrOH}$                                     | tag_kG7606                                          |                        |
| G7607  | TrGBrCl   | $\text{CH}_2\text{ClBr} + \text{OH} \rightarrow \text{LHYDROGEN} + \text{ProdSBr} +$<br>$\text{LCARBON} + \text{LCHLORINE} + \text{H}_2\text{O} + \text{Br}$                                                     | tag_kG7607                                          | Sander et al. (2011)   |
|        | transfer: | $\text{OH} \rightarrow 0.333 \text{ H}_2\text{O}$                                                                                                                                                                |                                                     |                        |
|        | tag: FHM  | $\text{CH}_2\text{ClBr} + {}^{\text{FHM}}\text{OH} \rightarrow \text{CH}_2\text{ClBr} + 0.3333333333333333$<br>${}^{\text{FHM}}\text{H}_2\text{O} + 0.3333333 \text{ PTPFHMH}_2\text{O} + \text{PTLFHMOH}$       | tag_kG7607                                          |                        |
|        | tag: FHM  | $\text{CH}_2\text{ClBr} + {}^{\text{FHM}_r}\text{OH} \rightarrow \text{CH}_2\text{ClBr} + 0.3333333333333333$<br>${}^{\text{FHM}_r}\text{H}_2\text{O} + 0.3333333 \text{ PTPFHMrH}_2\text{O} + \text{PTLFHMrOH}$ | tag_kG7607                                          |                        |
|        | transfer: | $\text{CHClBr}_2 \rightarrow 0.333 \text{ H}_2\text{O}$                                                                                                                                                          |                                                     |                        |



Table 1: Gas phase reactions (... continued)

| #      | labels    | reaction                                                                                                                                                                                                         | rate coefficient                                                            | reference              |
|--------|-----------|------------------------------------------------------------------------------------------------------------------------------------------------------------------------------------------------------------------|-----------------------------------------------------------------------------|------------------------|
|        | tag: FHM  | $\text{OH} + \text{CH}_2\text{ClBr} \rightarrow \text{OH} + \text{CH}_2\text{ClBr} + 0.3333333333333333$<br>$^{\text{FHM}}\text{H}_2\text{O} + 0.3333333 \text{ PTPFHMH}_2\text{O}$                              | $(\text{tag\_kG7607}) * \text{tag\_src\_}$<br>$\text{fFHMCHClBr2}$          |                        |
|        | tag: FHM  | $\text{OH} + \text{CH}_2\text{ClBr} \rightarrow \text{OH} + \text{CH}_2\text{ClBr} + 0.3333333333333333$<br>$^{\text{FHM}}\text{H}_2\text{O} + 0.3333333 \text{ PTPFHM}_r\text{H}_2\text{O}$                     | $(\text{tag\_kG7607}) * \text{tag\_src\_}$<br>$\text{fFHM}_r\text{CHClBr2}$ |                        |
|        | transfer: | $\text{CH}_2\text{ClBr} \rightarrow 0.333 \text{ H}_2\text{O}$                                                                                                                                                   |                                                                             |                        |
|        | tag: FHM  | $\text{OH} + ^{\text{FHM}}\text{CH}_2\text{ClBr} \rightarrow \text{OH} + 0.3333333333333333 ^{\text{FHM}}\text{H}_2\text{O}$<br>$+ 0.3333333 \text{ PTPFHMH}_2\text{O}$                                          | tag_kG7607                                                                  |                        |
|        | tag: FHM  | $\text{OH} + ^{\text{FHM}}\text{CH}_2\text{ClBr} \rightarrow \text{OH} + 0.3333333333333333$<br>$^{\text{FHM}}\text{H}_2\text{O} + 0.3333333 \text{ PTPFHM}_r\text{H}_2\text{O}$                                 | tag_kG7607                                                                  |                        |
| G9200  | StTrGS    | $\text{SO}_2 + \text{OH} \rightarrow 2 \text{ PHYDROGEN} + \text{ProdO3S} + \text{ProdO3} +$<br>$\text{H}_2\text{SO}_4 + \text{HO}_2$                                                                            | tag_kG9200                                                                  | Sander et al. (2011)   |
|        | transfer: | $\text{OH} \rightarrow \text{HO}_2$                                                                                                                                                                              |                                                                             |                        |
|        | tag: FHM  | $\text{SO}_2 + ^{\text{FHM}}\text{OH} \rightarrow \text{SO}_2 + ^{\text{FHM}}\text{HO}_2 + \text{PTLFHMOH}$                                                                                                      | tag_kG9200                                                                  |                        |
|        | tag: FHM  | $\text{SO}_2 + ^{\text{FHM}}\text{OH} \rightarrow \text{SO}_2 + ^{\text{FHM}}\text{HO}_2 + \text{PTLFHM}_r\text{OH}$                                                                                             | tag_kG9200                                                                  |                        |
|        | transfer: | $\text{H}_2\text{O} \rightarrow \text{H}_2\text{SO}_4$                                                                                                                                                           |                                                                             |                        |
|        | tag: FHM  | $\text{OH} + \text{SO}_2 \rightarrow \text{OH} + \text{SO}_2 + ^{\text{FHM}}\text{H}_2\text{SO}_4$                                                                                                               | $(\text{tag\_kG9200}) * \text{tag\_src\_fFHMH}_2\text{O}$                   |                        |
|        | tag: FHM  | $\text{OH} + \text{SO}_2 \rightarrow \text{OH} + \text{SO}_2 + ^{\text{FHM}}\text{H}_2\text{SO}_4$                                                                                                               | $(\text{tag\_kG9200}) * \text{tag\_src\_fFHM}_r\text{H}_2\text{O}$          |                        |
| G9400a | TrGCS     | $\text{DMS} + \text{OH} \rightarrow \text{ProdO3S} + \text{ProdO3} + \text{CH}_3\text{SO}_2 + \text{HCHO}$<br>$+ \text{H}_2\text{O}$                                                                             | tag_kG9400a                                                                 | Atkinson et al. (2004) |
|        | transfer: | $\text{OH} \rightarrow 0.5 \text{ H}_2\text{O}$                                                                                                                                                                  |                                                                             |                        |
|        | tag: FHM  | $\text{DMS} + ^{\text{FHM}}\text{OH} \rightarrow \text{DMS} + 0.5 ^{\text{FHM}}\text{H}_2\text{O} + 0.5$<br>$\text{PTPFHMH}_2\text{O} + \text{PTLFHMOH}$                                                         | tag_kG9400a                                                                 |                        |
|        | tag: FHM  | $\text{DMS} + ^{\text{FHM}}\text{OH} \rightarrow \text{DMS} + 0.5 ^{\text{FHM}}\text{H}_2\text{O} + 0.5$<br>$\text{PTPFHM}_r\text{H}_2\text{O} + \text{PTLFHM}_r\text{OH}$                                       | tag_kG9400a                                                                 |                        |
|        | transfer: | $\text{DMS} \rightarrow 0.5 \text{ H}_2\text{O} + \text{CH}_3\text{SO}_2 + \text{HCHO} + \text{CH}_3\text{O}_2$                                                                                                  |                                                                             |                        |
|        | tag: FHM  | $\text{OH} + ^{\text{FHM}}\text{DMS} \rightarrow \text{OH} + ^{\text{FHM}}\text{CH}_3\text{SO}_2 + ^{\text{FHM}}\text{HCHO} +$<br>$0.5 ^{\text{FHM}}\text{H}_2\text{O} + 0.5 \text{ PTPFHMH}_2\text{O}$          | tag_kG9400a                                                                 |                        |
|        | tag: FHM  | $\text{OH} + ^{\text{FHM}}\text{DMS} \rightarrow \text{OH} + ^{\text{FHM}}\text{CH}_3\text{SO}_2 + ^{\text{FHM}}\text{HCHO} +$<br>$0.5 ^{\text{FHM}}\text{H}_2\text{O} + 0.5 \text{ PTPFHM}_r\text{H}_2\text{O}$ | tag_kG9400a                                                                 |                        |
| G9400b | TrGCS     | $\text{DMS} + \text{OH} \rightarrow \text{ProdO3S} + \text{ProdO3} + \text{DMSO} + \text{HO}_2$                                                                                                                  | tag_kG9400b                                                                 | Atkinson et al. (2004) |
|        | transfer: | $\text{OH} \rightarrow \text{HO}_2$                                                                                                                                                                              |                                                                             |                        |
|        | tag: FHM  | $\text{DMS} + ^{\text{FHM}}\text{OH} \rightarrow \text{DMS} + ^{\text{FHM}}\text{HO}_2 + \text{PTLFHMOH}$                                                                                                        | tag_kG9400b                                                                 |                        |
|        | tag: FHM  | $\text{DMS} + ^{\text{FHM}}\text{OH} \rightarrow \text{DMS} + ^{\text{FHM}}\text{HO}_2 + \text{PTLFHM}_r\text{OH}$                                                                                               | tag_kG9400b                                                                 |                        |
|        | transfer: | $\text{DMS} \rightarrow \text{DMSO}$                                                                                                                                                                             |                                                                             |                        |
|        | tag: FHM  | $\text{OH} + ^{\text{FHM}}\text{DMS} \rightarrow \text{OH} + ^{\text{FHM}}\text{DMSO}$                                                                                                                           | tag_kG9400b                                                                 |                        |

Table 1: Gas phase reactions (... continued)

| #     | labels    | reaction                                                                                                                                                                                                                                                                      | rate coefficient | reference              |
|-------|-----------|-------------------------------------------------------------------------------------------------------------------------------------------------------------------------------------------------------------------------------------------------------------------------------|------------------|------------------------|
| G9401 | tag: FHM  | $\text{OH} + {}^{\text{FHM}}\text{rDMS} \rightarrow \text{OH} + {}^{\text{FHM}}\text{rDMSO}$                                                                                                                                                                                  | tag_kG9400b      | Atkinson et al. (2004) |
|       | TrGCNS    | $\text{DMS} + \text{NO}_3 \rightarrow \text{CH}_3\text{SO}_2 + \text{HNO}_3 + \text{HCHO}$                                                                                                                                                                                    | tag_kG9401       |                        |
|       | tag: FHM  | ${}^{\text{FHM}}\text{DMS} + \text{NO}_3 \rightarrow \text{NO}_3 + {}^{\text{FHM}}\text{CH}_3\text{SO}_2 + {}^{\text{FHM}}\text{HNO}_3 + {}^{\text{FHM}}\text{HCHO}$                                                                                                          | tag_kG9401       |                        |
| G9402 | tag: FHM  | ${}^{\text{FHM}}\text{rDMS} + \text{NO}_3 \rightarrow \text{NO}_3 + {}^{\text{FHM}}\text{rCH}_3\text{SO}_2 + {}^{\text{FHM}}\text{rHNO}_3 + {}^{\text{FHM}}\text{rHCHO}$                                                                                                      | tag_kG9401       | Hynes and Wine (1996)  |
|       | TrGCS     | $\text{DMSO} + \text{OH} \rightarrow 0.40000004 \text{ ProdO3S} + 0.40000004 \text{ ProdO3} + 0.6 \text{ H}_2\text{O} + 0.6 \text{ SO}_2 + \text{HCHO} + 0.6 \text{ CH}_3 + 0.4 \text{ HO}_2 + 0.4 \text{ CH}_3\text{SO}_3\text{H}$                                           | tag_kG9402       |                        |
|       | transfer: | $\text{DMSO} \rightarrow \text{CH}_3\text{O}_2 + \text{HCHO} + \text{CH}_3\text{SO}_3\text{H} + 0.5 \text{ H}_2\text{O} + \text{CH}_3$                                                                                                                                        |                  |                        |
|       | tag: FHM  | $\text{OH} + {}^{\text{FHM}}\text{DMSO} \rightarrow \text{OH} + 0.3 {}^{\text{FHM}}\text{H}_2\text{O} + 0.3 \text{ PTPFHMH}_2\text{O} + {}^{\text{FHM}}\text{HCHO} + 0.6 {}^{\text{FHM}}\text{CH}_3 + 0.4 {}^{\text{FHM}}\text{CH}_3\text{SO}_3\text{H}$                      | tag_kG9402       |                        |
|       | tag: FHM  | $\text{OH} + {}^{\text{FHM}}\text{rDMSO} \rightarrow \text{OH} + 0.3 {}^{\text{FHM}}\text{rH}_2\text{O} + 0.3 \text{ PTPFHM}_\text{r}\text{H}_2\text{O} + {}^{\text{FHM}}\text{rHCHO} + 0.6 {}^{\text{FHM}}\text{rCH}_3 + 0.4 {}^{\text{FHM}}\text{rCH}_3\text{SO}_3\text{H}$ | tag_kG9402       |                        |
|       | transfer: | $\text{OH} \rightarrow \text{HO}_2 + 0.5 \text{ H}_2\text{O}$                                                                                                                                                                                                                 |                  |                        |
| G9403 | tag: FHM  | $\text{DMSO} + {}^{\text{FHM}}\text{OH} \rightarrow \text{DMSO} + 0.3 {}^{\text{FHM}}\text{H}_2\text{O} + 0.3 \text{ PTPFHMH}_2\text{O} + 0.4 {}^{\text{FHM}}\text{HO}_2 + \text{PTLFHMOH}$                                                                                   | tag_kG9402       | Barone et al. (1995)   |
|       | tag: FHM  | $\text{DMSO} + {}^{\text{FHM}}\text{rOH} \rightarrow \text{DMSO} + 0.3 {}^{\text{FHM}}\text{rH}_2\text{O} + 0.3 \text{ PTPFHM}_\text{r}\text{H}_2\text{O} + 0.4 {}^{\text{FHM}}\text{rHO}_2 + \text{PTLFHM}_\text{r}\text{OH}$                                                | tag_kG9402       |                        |
|       | TrGS      | $\text{CH}_3\text{SO}_2 \rightarrow \text{SO}_2 + \text{CH}_3$                                                                                                                                                                                                                | tag_kG9403       |                        |
| G9404 | tag: FHM  | ${}^{\text{FHM}}\text{CH}_3\text{SO}_2 \rightarrow {}^{\text{FHM}}\text{CH}_3$                                                                                                                                                                                                | tag_kG9403       | Barone et al. (1995)   |
|       | tag: FHM  | ${}^{\text{FHM}}\text{rCH}_3\text{SO}_2 \rightarrow {}^{\text{FHM}}\text{rCH}_3$                                                                                                                                                                                              | tag_kG9403       |                        |
|       | TrGS      | $\text{CH}_3\text{SO}_2 + \text{O}_3 \rightarrow \text{CH}_3\text{SO}_3$                                                                                                                                                                                                      | tag_kG9404       |                        |
| G9405 | tag: FHM  | ${}^{\text{FHM}}\text{CH}_3\text{SO}_2 + \text{O}_3 \rightarrow \text{O}_3 + {}^{\text{FHM}}\text{CH}_3\text{SO}_3$                                                                                                                                                           | tag_kG9404       | Barone et al. (1995)   |
|       | tag: FHM  | ${}^{\text{FHM}}\text{rCH}_3\text{SO}_2 + \text{O}_3 \rightarrow \text{O}_3 + {}^{\text{FHM}}\text{rCH}_3\text{SO}_3$                                                                                                                                                         | tag_kG9404       |                        |
|       | TrGS      | $\text{CH}_3\text{SO}_3 + \text{HO}_2 \rightarrow \text{CH}_3\text{SO}_3\text{H}$                                                                                                                                                                                             | tag_kG9405       |                        |
|       | tag: FHM  | ${}^{\text{FHM}}\text{CH}_3\text{SO}_3 + \text{HO}_2 \rightarrow \text{HO}_2 + 0.75 {}^{\text{FHM}}\text{CH}_3\text{SO}_3\text{H}$                                                                                                                                            | tag_kG9405       |                        |
|       | tag: FHM  | ${}^{\text{FHM}}\text{rCH}_3\text{SO}_3 + \text{HO}_2 \rightarrow \text{HO}_2 + 0.75 {}^{\text{FHM}}\text{rCH}_3\text{SO}_3\text{H}$                                                                                                                                          | tag_kG9405       |                        |
|       | tag: FHM  | ${}^{\text{FHM}}\text{HO}_2 + \text{CH}_3\text{SO}_3 \rightarrow \text{CH}_3\text{SO}_3 + 0.25 {}^{\text{FHM}}\text{CH}_3\text{SO}_3\text{H}$                                                                                                                                 | tag_kG9405       |                        |
| G9600 | tag: FHM  | ${}^{\text{FHM}}\text{rHO}_2 + \text{CH}_3\text{SO}_3 \rightarrow \text{CH}_3\text{SO}_3 + 0.25 {}^{\text{FHM}}\text{rCH}_3\text{SO}_3\text{H}$                                                                                                                               | tag_kG9405       | Atkinson et al. (2004) |
|       | TrGCCIS   | $\text{DMS} + \text{Cl} \rightarrow \text{ProdO3S} + \text{ProdO3} + \text{CH}_3\text{SO}_2 + \text{HCl} + \text{HCHO}$                                                                                                                                                       | tag_kG9600       |                        |

Table 1: Gas phase reactions (... continued)

| #       | labels   | reaction                                                                                                                                                                                                                                           | rate coefficient | reference                    |
|---------|----------|----------------------------------------------------------------------------------------------------------------------------------------------------------------------------------------------------------------------------------------------------|------------------|------------------------------|
|         | tag: FHM | $\text{FHM}^{\text{DMS}} + \text{Cl} \rightarrow \text{Cl} + \text{FHM}^{\text{CH}_3\text{SO}_2} + \text{FHM}^{\text{HCl}} + \text{FHM}^{\text{HCHO}}$                                                                                             | tag_kG9600       |                              |
|         | tag: FHM | $\text{FHM}^{\text{rDMS}} + \text{Cl} \rightarrow \text{Cl} + \text{FHM}^{\text{rCH}_3\text{SO}_2} + \text{FHM}^{\text{rHCl}} + \text{FHM}^{\text{rHCHO}}$                                                                                         | tag_kG9600       |                              |
| G9700   | TrGBrCS  | $\text{DMS} + \text{Br} \rightarrow \text{ProdO3S} + \text{ProdO3} + \text{CH}_3\text{SO}_2 + \text{HBr} + \text{HCHO}$                                                                                                                            | tag_kG9700       | Jefferson et al. (1994)      |
|         | tag: FHM | $\text{FHM}^{\text{DMS}} + \text{Br} \rightarrow \text{Br} + \text{FHM}^{\text{CH}_3\text{SO}_2} + \text{FHM}^{\text{HBr}} + \text{FHM}^{\text{HCHO}}$                                                                                             | tag_kG9700       |                              |
|         | tag: FHM | $\text{FHM}^{\text{rDMS}} + \text{Br} \rightarrow \text{Br} + \text{FHM}^{\text{rCH}_3\text{SO}_2} + \text{FHM}^{\text{rHBr}} + \text{FHM}^{\text{rHCHO}}$                                                                                         | tag_kG9700       |                              |
| G9701   | TrGBrCS  | $\text{DMS} + \text{BrO} \rightarrow \text{DMSO} + \text{Br}$                                                                                                                                                                                      | tag_kG9701       | Ingham et al. (1999)         |
|         | tag: FHM | $\text{FHM}^{\text{DMS}} + \text{BrO} \rightarrow \text{BrO} + \text{FHM}^{\text{DMSO}}$                                                                                                                                                           | tag_kG9701       |                              |
|         | tag: FHM | $\text{FHM}^{\text{rDMS}} + \text{BrO} \rightarrow \text{BrO} + \text{FHM}^{\text{rDMSO}}$                                                                                                                                                         | tag_kG9701       |                              |
| G6413   | StTrGCIN | $\text{Cl} + \text{CH}_3\text{ONO}_2 \rightarrow \text{ProdO3Cl} + \text{ProdO3} + \text{HCl} + \text{HCHO} + \text{NO}_2$                                                                                                                         | tag_kG6413       | Sander et al. (2011)         |
|         | tag: FHM | $\text{FHM}^{\text{CH}_3\text{ONO}_2} + \text{Cl} \rightarrow \text{Cl} + \text{FHM}^{\text{HCl}} + \text{FHM}^{\text{HCHO}}$                                                                                                                      | tag_kG6413       |                              |
|         | tag: FHM | $\text{FHM}^{\text{rCH}_3\text{ONO}_2} + \text{Cl} \rightarrow \text{Cl} + \text{FHM}^{\text{rHCl}} + \text{FHM}^{\text{rHCHO}}$                                                                                                                   | tag_kG6413       |                              |
| G6414   | StTrGCIN | $\text{Cl} + \text{CH}_3\text{ONO} \rightarrow \text{HCl} + \text{HCHO} + \text{NO}$                                                                                                                                                               | tag_kG6414       | Sokolov et al. (1999)        |
|         | tag: FHM | $\text{FHM}^{\text{CH}_3\text{ONO}} + \text{Cl} \rightarrow \text{Cl} + \text{FHM}^{\text{HCl}} + \text{FHM}^{\text{HCHO}}$                                                                                                                        | tag_kG6414       |                              |
|         | tag: FHM | $\text{FHM}^{\text{rCH}_3\text{ONO}} + \text{Cl} \rightarrow \text{Cl} + \text{FHM}^{\text{rHCl}} + \text{FHM}^{\text{rHCHO}}$                                                                                                                     | tag_kG6414       |                              |
| G6415   | StTrGCl  | $\text{Cl} + \text{CH}_3\text{O}_2 \rightarrow 0.5 \text{ ProdO3Cl} + 0.5 \text{ ProdO3} + 0.5 \text{ ClO} + 0.5 \text{ CH}_3\text{O} + 0.5 \text{ HCl} + 0.5 \text{ CO} + 0.5 \text{ HO}_2 + 0.5 \text{ OH}$                                      | tag_kG6415       | Sander et al. (2011)         |
|         | tag: FHM | $\text{FHM}^{\text{CH}_3\text{O}_2} + \text{Cl} \rightarrow \text{Cl} + 0.5 \text{ FHM}^{\text{CH}_3\text{O}} + 0.5 \text{ FHM}^{\text{HCl}} + 0.5 \text{ FHM}^{\text{HO}_2} + 0.5 \text{ FHM}^{\text{OH}} + 0.5 \text{ PTPFHM}^{\text{OH}}$       | tag_kG6415       |                              |
|         | tag: FHM | $\text{FHM}^{\text{rCH}_3\text{O}_2} + \text{Cl} \rightarrow \text{Cl} + 0.5 \text{ FHM}^{\text{rCH}_3\text{O}} + 0.5 \text{ FHM}^{\text{rHCl}} + 0.5 \text{ FHM}^{\text{rHO}_2} + 0.5 \text{ FHM}^{\text{rOH}} + 0.5 \text{ PTPFHM}^{\text{rOH}}$ | tag_kG6415       |                              |
| G01Diag | StTrG    | $\text{O}_3(\text{s}) \rightarrow \text{LO}_3(\text{s})$                                                                                                                                                                                           | k_03s            | Roelofs and Lelieveld (1997) |

## General notes

### Three-body reactions

Rate coefficients for three-body reactions are defined via the function `k_3rd`( $T, M, k_0^{300}, n, k_{\text{inf}}^{300}, m, f_c$ ). In the code, the temperature  $T$  is called `temp` and the concentration of “air molecules”  $M$  is called `cair`. Using the auxiliary variables  $k_0(T)$ ,  $k_{\text{inf}}(T)$ , and  $k_{\text{ratio}}$ , `k_3rd` is defined as:

$$k_0(T) = k_0^{300} \times \left(\frac{300\text{K}}{T}\right)^n \quad (1)$$

$$k_{\text{inf}}(T) = k_{\text{inf}}^{300} \times \left(\frac{300\text{K}}{T}\right)^m \quad (2)$$

$$k_{\text{ratio}} = \frac{k_0(T)M}{k_{\text{inf}}(T)} \quad (3)$$

$$\text{k\_3rd} = \frac{k_0(T)M}{1 + k_{\text{ratio}}} \times f_c^{\left(\frac{1}{1 + (\log_{10}(k_{\text{ratio}}))^2}\right)} \quad (4)$$

A similar function, called `k_3rd_iupac` here, is used by T. J. Wallington et al. (2014) for three-body reactions. It has the same function parameters as `k_3rd` and it is defined as:

$$k_0(T) = k_0^{300} \times \left(\frac{300\text{K}}{T}\right)^n \quad (5)$$

$$k_{\text{inf}}(T) = k_{\text{inf}}^{300} \times \left(\frac{300\text{K}}{T}\right)^m \quad (6)$$

$$k_{\text{ratio}} = \frac{k_0(T)M}{k_{\text{inf}}(T)} \quad (7)$$

$$N = 0.75 - 1.27 \times \log_{10}(f_c) \quad (8)$$

$$\text{k\_3rd\_iupac} = \frac{k_0(T)M}{1 + k_{\text{ratio}}} \times f_c^{\left(\frac{1}{1 + (\log_{10}(k_{\text{ratio}})/N)^2}\right)} \quad (9)$$

### RO<sub>2</sub> self and cross reactions

The self and cross reactions of organic peroxy radicals are treated according to the permutation reaction formalism as implemented in the MCM (Rickard and Pascoe, 2009), as described by Jenkin et al. (1997). Every organic peroxy radical reacts in a pseudo-first-order reaction with a rate constant that is expressed as  $k^{1\text{st}} = 2 \times \sqrt{k_{\text{self}} \times k_{\text{CH3O2}}} \times [\text{RO}_2]$  where  $k_{\text{self}}$  = second-order rate coefficient of the self reaction of the organic peroxy radical,  $k_{\text{CH3O2}}$  = second-order rate coefficient of the self reaction of  $\text{CH}_3\text{O}_2$ , and  $[\text{RO}_2]$  = sum of the concentrations of all organic peroxy radicals.

### Specific notes

**G1002a:** The path leading to  $2 \text{ O}(^3\text{P}) + \text{O}_2$  results in a null cycle regarding odd oxygen and is neglected.

**G3109:** The rate coefficient is: `k_NO3_NO2 = k_3rd(temp, cair, 2.E-30, 4.4, 1.4E-12, 0.7, 0.6)`.

**G3110:** The rate coefficient is defined as backward reaction divided by equilibrium constant.

**G4201:** The product distribution is from Rickard and Pascoe (2009), after substitution of the Criegee intermediate by its decomposition products.

**G4206:** The product  $\text{C}_2\text{H}_5\text{OH}$ , which reacts only with OH, is substituted by its degradation products  $\approx 0.1 \text{ HOCH}_2\text{CH}_2\text{O}_2 + 0.9 \text{ CH}_3\text{CHO} + 0.9 \text{ HO}_2$ .

**G4207:** Same value as for G4107

**G4213:** The rate coefficient is: `k_CH3CO3_NO2 = k_3rd(temp, cair, 9.7E-29, 5.6, 9.3E-12, 1.5, 0.6)`.

**G4221:** The rate coefficient `isk_PAN_M = k_CH3CO3_NO2/9.E-29*EXP(-14000./temp)`, i.e. the rate coefficient is defined as backward reaction divided by equilibrium constant.

**G4307:** Same value as for G4107

**G4315:** Same value as for G4107

**G4401:** Same value as for G4306

**G4402:** Same value as for G4304

**G4403:** Same value as for G4305

**G4404:** Same value as for G4107

**G4414:** Same value as for G4304

**G4415:** Same value as for G4305

**G4416:** Same value as for G4107

**G4419:** Same value as for G4221

**G6103:** The rate coefficient is defined as backward reaction divided by equilibrium constant.

**G7302:** The rate coefficient is: `k_BrO_NO2 = k_3rd(temp, cair, 5.2E-31, 3.2, 6.9E-12, 2.9, 0.6)`.

**G7303:** The rate coefficient is defined as backward reaction (Atkinson et al., 2007) divided by equilibrium constant (Orlando and Tyndall, 1996).

Table 2: Photolysis reactions

| #      | labels    | reaction                                                                                                                | rate coefficient | reference            |
|--------|-----------|-------------------------------------------------------------------------------------------------------------------------|------------------|----------------------|
| J1000a | UpStTrGJ  | $O_2 + h\nu \rightarrow 2. \text{ProdO3O} + 2. \text{ProdO3} + O(^3P) + O(^3P)$                                         | jx(ip_02)        | Sander et al. (2014) |
| J1001a | UpStTrGJ  | $O_3 + h\nu \rightarrow O(^1D) + O_2$                                                                                   | jx(ip_01D)       | Sander et al. (2014) |
| J1001b | UpStTrGJ  | $O_3 + h\nu \rightarrow O(^3P) + O_2$                                                                                   | jx(ip_03P)       | Sander et al. (2014) |
| J2100a | UpStGJ    | $H_2O + h\nu \rightarrow H + OH$                                                                                        | tag_kJ2100a      | Sander et al. (2014) |
|        | tag: FHM  | $^{FHM}H_2O + h\nu \rightarrow h\nu + ^{FHM}rH + ^{FHM}rOH + \text{PTPFHMrOH} + \text{PTLFHMrH}_2O$                     | tag_kJ2100a      |                      |
|        | tag: FHM  | $^{FHM}rH_2O + h\nu \rightarrow h\nu + ^{FHM}rH + ^{FHM}rOH + \text{PTPFHMrOH} + \text{PTLFHMrH}_2O$                    | tag_kJ2100a      |                      |
| J2101  | UpStTrGJ  | $H_2O_2 + h\nu \rightarrow 2 OH$                                                                                        | tag_kJ2101       | Sander et al. (2014) |
|        | tag: FHM  | $^{FHM}H_2O_2 + h\nu \rightarrow h\nu + 2.0 ^{FHM}OH + 2.0 \text{PTPFHMrOH}$                                            | tag_kJ2101       |                      |
|        | tag: FHM  | $^{FHM}rH_2O_2 + h\nu \rightarrow h\nu + 2.0 ^{FHM}rOH + 2.0 \text{PTPFHMrOH}$                                          | tag_kJ2101       |                      |
| J3100  | UpStGJN   | $N_2O + h\nu \rightarrow 1. \text{ProdO3N} + 1. \text{ProdO3} + O(^1D) + N_2$                                           | jx(ip_N20)       | Sander et al. (2014) |
| J3101  | UpStTrGJN | $NO_2 + h\nu \rightarrow NO + O(^3P)$                                                                                   | jx(ip_N02)       | Sander et al. (2014) |
| J3102a | UpStGJN   | $NO + h\nu \rightarrow 1. \text{ProdO3N} + 1. \text{ProdO3} + N + O(^3P)$                                               | jx(ip_N0)        | Sander et al. (2014) |
| J3103a | UpStTrGJN | $NO_3 + h\nu \rightarrow NO_2 + O(^3P)$                                                                                 | jx(ip_N020)      | Sander et al. (2014) |
| J3103b | UpStTrGJN | $NO_3 + h\nu \rightarrow 2. \text{LossO3N} + 2. \text{LossO3} + NO + O_2$                                               | jx(ip_N002)      | Sander et al. (2014) |
| J3104  | StTrGJN   | $N_2O_5 + h\nu \rightarrow NO_2 + NO_3$                                                                                 | jx(ip_N205)      | Sander et al. (2014) |
| J3200  | TrGJN     | $HONO + h\nu \rightarrow NO + OH$                                                                                       | tag_kJ3200       | Sander et al. (2014) |
|        | tag: FHM  | $^{FHM}HONO + h\nu \rightarrow h\nu + ^{FHM}OH + \text{PTPFHMrOH}$                                                      | tag_kJ3200       |                      |
|        | tag: FHM  | $^{FHM}rHONO + h\nu \rightarrow h\nu + ^{FHM}rOH + \text{PTPFHMrOH}$                                                    | tag_kJ3200       |                      |
| J3201  | StTrGJN   | $HNO_3 + h\nu \rightarrow NO_2 + OH$                                                                                    | tag_kJ3201       | Sander et al. (2014) |
|        | tag: FHM  | $^{FHM}HNO_3 + h\nu \rightarrow h\nu + ^{FHM}OH + \text{PTPFHMrOH}$                                                     | tag_kJ3201       |                      |
|        | tag: FHM  | $^{FHM}rHNO_3 + h\nu \rightarrow h\nu + ^{FHM}rOH + \text{PTPFHMrOH}$                                                   | tag_kJ3201       |                      |
| J3202  | StTrGJN   | $HNO_4 + h\nu \rightarrow 0.333 \text{ProdO3N} + 0.333 \text{ProdO3} + 0.667 NO_2 + 0.667 HO_2 + 0.333 NO_3 + 0.333 OH$ | tag_kJ3202       | Sander et al. (2014) |
|        | tag: FHM  | $^{FHM}HNO_4 + h\nu \rightarrow h\nu + 0.667 ^{FHM}HO_2 + 0.333 ^{FHM}OH + 0.333 \text{PTPFHMrOH}$                      | tag_kJ3202       |                      |
|        | tag: FHM  | $^{FHM}rHNO_4 + h\nu \rightarrow h\nu + 0.667 ^{FHM}rHO_2 + 0.333 ^{FHM}rOH + 0.333 \text{PTPFHMrOH}$                   | tag_kJ3202       |                      |
| J41000 | StTrGJ    | $CH_3OOH + h\nu \rightarrow CH_3O + OH$                                                                                 | tag_kJ41000      | Sander et al. (2014) |
|        | tag: FHM  | $^{FHM}CH_3OOH + h\nu \rightarrow h\nu + ^{FHM}CH_3O + ^{FHM}OH + \text{PTPFHMrOH}$                                     | tag_kJ41000      |                      |
|        | tag: FHM  | $^{FHM}rCH_3OOH + h\nu \rightarrow h\nu + ^{FHM}rCH_3O + ^{FHM}rOH + \text{PTPFHMrOH}$                                  | tag_kJ41000      |                      |

Table 2: Photolysis reactions (... continued)

| #       | labels   | reaction                                                                                                                                                                                                                                                                                                                                                                                                                   | rate coefficient | reference            |
|---------|----------|----------------------------------------------------------------------------------------------------------------------------------------------------------------------------------------------------------------------------------------------------------------------------------------------------------------------------------------------------------------------------------------------------------------------------|------------------|----------------------|
| J41001a | StTrGJ   | $\text{HCHO} + h\nu \rightarrow \text{H}_2 + \text{CO}$                                                                                                                                                                                                                                                                                                                                                                    | tag_kJ41001a     | Sander et al. (2014) |
|         | tag: FHM | $^{\text{FHM}}\text{HCHO} + h\nu \rightarrow h\nu + ^{\text{FHM}}\text{H}_2 + \text{PTPFHMH}_2$                                                                                                                                                                                                                                                                                                                            | tag_kJ41001a     |                      |
|         | tag: FHM | $^{\text{FHM}r}\text{HCHO} + h\nu \rightarrow h\nu + ^{\text{FHM}r}\text{H}_2 + \text{PTPFHMrH}_2$                                                                                                                                                                                                                                                                                                                         | tag_kJ41001a     |                      |
| J41001b | StTrGJ   | $\text{HCHO} + h\nu \rightarrow \text{H} + \text{CO} + \text{HO}_2$                                                                                                                                                                                                                                                                                                                                                        | tag_kJ41001b     | Sander et al. (2014) |
|         | tag: FHM | $^{\text{FHM}}\text{HCHO} + h\nu \rightarrow h\nu + ^{\text{FHM}}\text{H} + ^{\text{FHM}}\text{HO}_2$                                                                                                                                                                                                                                                                                                                      | tag_kJ41001b     |                      |
|         | tag: FHM | $^{\text{FHM}r}\text{HCHO} + h\nu \rightarrow h\nu + ^{\text{FHM}r}\text{H} + ^{\text{FHM}r}\text{HO}_2$                                                                                                                                                                                                                                                                                                                   | tag_kJ41001b     |                      |
| J41002  | StGJ     | $\text{CO}_2 + h\nu \rightarrow 1. \text{ ProdO3C} + 1. \text{ ProdO3} + \text{CO} + \text{O}(^3\text{P})$                                                                                                                                                                                                                                                                                                                 | jx(ip_C02)       | Sander et al. (2014) |
| J41003  | StGJ     | $\text{CH}_4 + h\nu \rightarrow 0.0864 \text{ ProdO3C} + 0.0864 \text{ ProdO3} + 0.42 \text{ CH}_3 + 0.62 \text{ H} + 0.7912 \text{ H}_2 + 0.0864 \text{ HCHO} + 0.0864 \text{ O}(^3\text{P}) + 0.1584 \text{ OH} + 0.1584 \text{ HO}_2 + 0.2112 \text{ CO}_2 + 0.1824 \text{ CO} + 0.024 \text{ H}_2\text{O} + 0.1 \text{ L CARBON}$                                                                                      | tag_kJ41003      | Sander et al. (2014) |
|         | tag: FHM | $^{\text{FHM}}\text{CH}_4 + h\nu \rightarrow h\nu + 0.42 ^{\text{FHM}}\text{CH}_3 + 0.62 ^{\text{FHM}}\text{H} + 0.7912 ^{\text{FHM}}\text{H}_2 + 0.7912 \text{ PTPFHMH}_2 + 0.0864 ^{\text{FHM}}\text{HCHO} + 0.1584 ^{\text{FHM}}\text{OH} + 0.1584 \text{ PTPFHMOH} + 0.1584 ^{\text{FHM}}\text{HO}_2 + 0.024 ^{\text{FHM}}\text{H}_2\text{O} + 0.024 \text{ PTPFHMH}_2\text{O} + \text{PTLFHMCCH}_4$                   | tag_kJ41003      |                      |
|         | tag: FHM | $^{\text{FHM}r}\text{CH}_4 + h\nu \rightarrow h\nu + 0.42 ^{\text{FHM}r}\text{CH}_3 + 0.62 ^{\text{FHM}r}\text{H} + 0.7912 ^{\text{FHM}r}\text{H}_2 + 0.7912 \text{ PTPFHMrH}_2 + 0.0864 ^{\text{FHM}r}\text{HCHO} + 0.1584 ^{\text{FHM}r}\text{OH} + 0.1584 \text{ PTPFHMroH} + 0.1584 ^{\text{FHM}r}\text{HO}_2 + 0.024 ^{\text{FHM}r}\text{H}_2\text{O} + 0.024 \text{ PTPFHM}r\text{H}_2\text{O} + \text{PTLFHMrCH}_4$ | tag_kJ41003      |                      |
| J41004  | StTrGJN  | $\text{CH}_3\text{ONO} + h\nu \rightarrow \text{CH}_3\text{O} + \text{NO}$                                                                                                                                                                                                                                                                                                                                                 | tag_kJ41004      | Sander et al. (2014) |
|         | tag: FHM | $^{\text{FHM}}\text{CH}_3\text{ONO} + h\nu \rightarrow h\nu + ^{\text{FHM}}\text{CH}_3\text{O}$                                                                                                                                                                                                                                                                                                                            | tag_kJ41004      |                      |
|         | tag: FHM | $^{\text{FHM}r}\text{CH}_3\text{ONO} + h\nu \rightarrow h\nu + ^{\text{FHM}r}\text{CH}_3\text{O}$                                                                                                                                                                                                                                                                                                                          | tag_kJ41004      |                      |
| J41005  | StTrGJN  | $\text{CH}_3\text{ONO}_2 + h\nu \rightarrow \text{ProdO3C} + \text{ProdO3} + \text{CH}_3\text{O} + \text{NO}_2$                                                                                                                                                                                                                                                                                                            | tag_kJ41005      | Sander et al. (2014) |
|         | tag: FHM | $^{\text{FHM}}\text{CH}_3\text{ONO}_2 + h\nu \rightarrow h\nu + ^{\text{FHM}}\text{CH}_3\text{O}$                                                                                                                                                                                                                                                                                                                          | tag_kJ41005      |                      |
|         | tag: FHM | $^{\text{FHM}r}\text{CH}_3\text{ONO}_2 + h\nu \rightarrow h\nu + ^{\text{FHM}r}\text{CH}_3\text{O}$                                                                                                                                                                                                                                                                                                                        | tag_kJ41005      |                      |
| J41006  | StTrGJN  | $\text{CH}_3\text{O}_2\text{NO}_2 + h\nu \rightarrow 1.333 \text{ ProdO3C} + 1.333 \text{ ProdO3} + 0.667 \text{ NO}_2 + 0.667 \text{ CH}_3\text{O}_2 + 0.333 \text{ NO}_3 + 0.333 \text{ CH}_3\text{O}$                                                                                                                                                                                                                   | tag_kJ41006      | Sander et al. (2014) |
|         | tag: FHM | $^{\text{FHM}}\text{CH}_3\text{O}_2\text{NO}_2 + h\nu \rightarrow h\nu + 0.667 ^{\text{FHM}}\text{CH}_3\text{O}_2 + 0.333 ^{\text{FHM}}\text{CH}_3\text{O}$                                                                                                                                                                                                                                                                | tag_kJ41006      |                      |
|         | tag: FHM | $^{\text{FHM}r}\text{CH}_3\text{O}_2\text{NO}_2 + h\nu \rightarrow h\nu + 0.667 ^{\text{FHM}r}\text{CH}_3\text{O}_2 + 0.333 ^{\text{FHM}r}\text{CH}_3\text{O}$                                                                                                                                                                                                                                                             | tag_kJ41006      |                      |
| J41008  | StTrGJ   | $\text{CH}_3\text{O}_2 + h\nu \rightarrow \text{HCHO} + \text{OH}$                                                                                                                                                                                                                                                                                                                                                         | tag_kJ41008      | Sander et al. (2014) |
|         | tag: FHM | $^{\text{FHM}}\text{CH}_3\text{O}_2 + h\nu \rightarrow h\nu + ^{\text{FHM}}\text{HCHO} + ^{\text{FHM}}\text{OH} + \text{PTPFHMOH}$                                                                                                                                                                                                                                                                                         | tag_kJ41008      |                      |
|         | tag: FHM | $^{\text{FHM}r}\text{CH}_3\text{O}_2 + h\nu \rightarrow h\nu + ^{\text{FHM}r}\text{HCHO} + ^{\text{FHM}r}\text{OH} + \text{PTPFHMrOH}$                                                                                                                                                                                                                                                                                     | tag_kJ41008      |                      |

Table 2: Photolysis reactions (... continued)

| #      | labels   | reaction                                                                                                                                                                                         | rate coefficient                     | reference                   |
|--------|----------|--------------------------------------------------------------------------------------------------------------------------------------------------------------------------------------------------|--------------------------------------|-----------------------------|
| J41009 | StTrGJ   | $\text{HCOOH} + h\nu \rightarrow \text{CO} + \text{HO}_2 + \text{OH}$                                                                                                                            | tag_kJ41009                          | Sander et al. (2014)        |
|        | tag: FHM | $^{\text{FHM}}\text{HCOOH} + h\nu \rightarrow h\nu + ^{\text{FHM}}\text{HO}_2 + ^{\text{FHM}}\text{OH} + \text{PTPFHMOH}$                                                                        | tag_kJ41009                          |                             |
|        | tag: FHM | $^{\text{FHM}}\text{HCOOH} + h\nu \rightarrow h\nu + ^{\text{FHM}}\text{HO}_2 + ^{\text{FHM}}\text{OH} + \text{PTPFHMrOH}$                                                                       | tag_kJ41009                          |                             |
| J4200  | TrGJC    | $\text{C}_2\text{H}_5\text{OOH} + h\nu \rightarrow \text{CH}_3\text{CHO} + \text{HO}_2 + \text{OH}$                                                                                              | jx(ip_CH300H)                        | von Kuhlmann (2001)         |
| J4201  | TrGJC    | $\text{CH}_3\text{CHO} + h\nu \rightarrow \text{CH}_3\text{O}_2 + \text{HO}_2 + \text{CO}$                                                                                                       | jx(ip_CH3CHO)                        | Sander et al. (2014)        |
| J4202  | TrGJC    | $\text{CH}_3\text{C(O)OOH} + h\nu \rightarrow \text{CH}_3\text{O}_2 + \text{OH} + \text{CO}_2$                                                                                                   | jx(ip_CH3C03H)                       | Sander et al. (2014)        |
| J4203  | TrGJCN   | $\text{NACA} + h\nu \rightarrow \text{NO}_2 + \text{HCHO} + \text{CO}$                                                                                                                           | 0.19*jx(ip_CHOH)                     | von Kuhlmann (2001)         |
| J4204  | TrGJCN   | $\text{PAN} + h\nu \rightarrow \text{CH}_3\text{C(O)OO} + \text{NO}_2$                                                                                                                           | jx(ip_PAN)                           | Sander et al. (2014)        |
| J4300  | TrGJC    | $\text{iC}_3\text{H}_7\text{OOH} + h\nu \rightarrow \text{CH}_3\text{COCH}_3 + \text{HO}_2 + \text{OH}$                                                                                          | jx(ip_CH300H)                        | von Kuhlmann (2001)         |
| J4301  | TrGJC    | $\text{CH}_3\text{COCH}_3 + h\nu \rightarrow \text{CH}_3\text{C(O)OO} + \text{CH}_3\text{O}_2$                                                                                                   | jx(ip_CH3COCH3)                      | Sander et al. (2014)        |
| J4302  | TrGJC    | $\text{CH}_3\text{COCH}_2\text{OH} + h\nu \rightarrow \text{CH}_3\text{C(O)OO} + \text{HCHO} + \text{HO}_2$                                                                                      | 0.074*jx(ip_CHOH)                    | see note*                   |
| J4303  | TrGJC    | $\text{MGLYOX} + h\nu \rightarrow \text{CH}_3\text{C(O)OO} + \text{CO} + \text{HO}_2$                                                                                                            | jx(ip_MGLYOX)                        | Sander et al. (2014)        |
| J4304  | TrGJC    | $\text{CH}_3\text{COCH}_2\text{O}_2\text{H} + h\nu \rightarrow \text{CH}_3\text{C(O)OO} + \text{HCHO} + \text{OH}$                                                                               | jx(ip_CH300H)                        | see note*                   |
| J4306  | TrGJCN   | $\text{iC}_3\text{H}_7\text{ONO}_2 + h\nu \rightarrow \text{CH}_3\text{COCH}_3 + \text{NO}_2 + \text{HO}_2$                                                                                      | 3.7*jx(ip_PAN)                       | von Kuhlmann et al. (2003)* |
| J4400  | TrGJC    | $\text{LC}_4\text{H}_9\text{OOH} + h\nu \rightarrow \text{OH} + .67 \text{ MEK} + .67 \text{ HO}_2 + .33 \text{ C}_2\text{H}_5\text{O}_2 + .33 \text{ CH}_3\text{CHO}$                           | jx(ip_CH300H)                        | Rickard and Pascoe (2009)   |
| J4401  | TrGJC    | $\text{MVK} + h\nu \rightarrow \text{CH}_3\text{C(O)OO} + \text{HCHO} + \text{CO} + \text{HO}_2$                                                                                                 | 0.019*jx(ip_COH2)+.015*jx(ip_MGLYOX) | Sander et al. (2014)        |
| J4402  | TrGJC    | $\text{MVKOOH} + h\nu \rightarrow \text{OH} + .5 \text{ MGLYOX} + .25 \text{ CH}_3\text{COCH}_2\text{OH} + .75 \text{ HCHO} + .75 \text{ HO}_2 + .25 \text{ CH}_3\text{C(O)OO} + .25 \text{ CO}$ | jx(ip_CH300H)                        | see note*                   |
| J4403  | TrGJC    | $\text{MEK} + h\nu \rightarrow \text{CH}_3\text{C(O)OO} + \text{C}_2\text{H}_5\text{O}_2$                                                                                                        | 0.42*jx(ip_CHOH)                     | von Kuhlmann et al. (2003)  |
| J4404  | TrGJC    | $\text{LMEKOOH} + h\nu \rightarrow \text{CH}_3\text{C(O)OO} + \text{CH}_3\text{CHO} + \text{OH}$                                                                                                 | jx(ip_CH300H)                        | Rickard and Pascoe (2009)   |
| J4405  | TrGJC    | $\text{BIACET} + h\nu \rightarrow 2 \text{ CH}_3\text{C(O)OO}$                                                                                                                                   | 2.15*jx(ip_MGLYOX)                   | see note*                   |
| J4406  | TrGJCN   | $\text{LC4H9NO3} + h\nu \rightarrow \text{NO}_2 + .67 \text{ MEK} + .67 \text{ HO}_2 + .33 \text{ C}_2\text{H}_5\text{O}_2 + .33 \text{ CH}_3\text{CHO}$                                         | 3.7*jx(ip_PAN)                       | von Kuhlmann (2001)         |
| J4407  | TrGJCN   | $\text{MPAN} + h\nu \rightarrow \text{CH}_3\text{COCH}_2\text{OH} + \text{NO}_2$                                                                                                                 | jx(ip_PAN)                           | see note*                   |
| J4500  | TrGJC    | $\text{ISOOH} + h\nu \rightarrow \text{MVK} + \text{HCHO} + \text{HO}_2 + \text{OH}$                                                                                                             | jx(ip_CH300H)                        | see note*                   |
| J4501  | TrGJCN   | $\text{ISON} + h\nu \rightarrow \text{MVK} + \text{HCHO} + \text{NO}_2 + \text{HO}_2$                                                                                                            | 3.7*jx(ip_PAN)                       | von Kuhlmann (2001)         |
| J6000  | StTrGJCl | $\text{Cl}_2 + h\nu \rightarrow \text{Cl} + \text{Cl}$                                                                                                                                           | jx(ip_Cl2)                           | Sander et al. (2014)        |
| J6100  | StTrGJCl | $\text{Cl}_2\text{O}_2 + h\nu \rightarrow 2. \text{ LossO3Cl} + 2. \text{ LossO3} + 2 \text{ Cl}$                                                                                                | jx(ip_Cl202)                         | Sander et al. (2014)        |
| J6101  | StTrGJCl | $\text{OClo} + h\nu \rightarrow 1. \text{ ProdO3Cl} + 1. \text{ ProdO3} + \text{ClO} + \text{O}(^3\text{P})$                                                                                     | jx(ip_OC10)                          | Sander et al. (2014)        |
| J6200  | StGJCl   | $\text{HCl} + h\nu \rightarrow \text{Cl} + \text{H}$                                                                                                                                             | tag_kJ6200                           | Sander et al. (2014)        |

Table 2: Photolysis reactions (... continued)

| #      | labels    | reaction                                                                                                                                                                                  | rate coefficient | reference             |
|--------|-----------|-------------------------------------------------------------------------------------------------------------------------------------------------------------------------------------------|------------------|-----------------------|
|        | tag: FHM  | ${}^{\text{FHM}}\text{HCl} + h\nu \rightarrow h\nu + {}^{\text{FHM}}\text{H}$                                                                                                             | tag_kJ6200       |                       |
|        | tag: FHM  | ${}^{\text{FHM}}\text{rHCl} + h\nu \rightarrow h\nu + {}^{\text{FHM}}\text{rH}$                                                                                                           | tag_kJ6200       |                       |
| J6201  | StTrGJCl  | $\text{HOCl} + h\nu \rightarrow \text{LossO3Cl} + \text{LossO3} + \text{OH} + \text{Cl}$                                                                                                  | tag_kJ6201       | Sander et al. (2014)  |
|        | tag: FHM  | ${}^{\text{FHM}}\text{HOCl} + h\nu \rightarrow h\nu + {}^{\text{FHM}}\text{OH} + \text{PTPFHMOH}$                                                                                         | tag_kJ6201       |                       |
|        | tag: FHM  | ${}^{\text{FHM}}\text{rHOCl} + h\nu \rightarrow h\nu + {}^{\text{FHM}}\text{rOH} + \text{PTPFHMrOH}$                                                                                      | tag_kJ6201       |                       |
| J6300  | TrGJCIN   | $\text{ClNO}_2 + h\nu \rightarrow 1. \text{ProdO3Cl} + 1. \text{ProdO3} + \text{Cl} + \text{NO}_2$                                                                                        | jx(ip_ClNO2)     | Sander et al. (2014)  |
| J6301a | StTrGJCIN | $\text{ClNO}_3 + h\nu \rightarrow \text{Cl} + \text{NO}_3$                                                                                                                                | jx(ip_ClNO3)     | Sander et al. (2014)  |
| J6301b | StTrGJCIN | $\text{ClNO}_3 + h\nu \rightarrow \text{ClO} + \text{NO}_2$                                                                                                                               | jx(ip_ClON02)    | Sander et al. (2014)  |
| J6400  | StGJCl    | $\text{CH}_3\text{Cl} + h\nu \rightarrow \text{ProdLCl} + \text{Cl} + \text{CH}_3$                                                                                                        | tag_kJ6400       | Sander et al. (2014)  |
|        | tag: FHM  | ${}^{\text{FHM}}\text{CH}_3\text{Cl} + h\nu \rightarrow h\nu + {}^{\text{FHM}}\text{CH}_3$                                                                                                | tag_kJ6400       |                       |
|        | tag: FHM  | ${}^{\text{FHM}}\text{rCH}_3\text{Cl} + h\nu \rightarrow h\nu + {}^{\text{FHM}}\text{rCH}_3$                                                                                              | tag_kJ6400       |                       |
| J6401  | StGJCl    | $\text{CCl}_4 + h\nu \rightarrow 4.0 \text{ProdLCl} + \text{LCARBON} + 4 \text{Cl}$                                                                                                       | jx(ip_CCl4)      | Sander et al. (2014)  |
| J6402  | StGJCCl   | $\text{CH}_3\text{CCl}_3 + h\nu \rightarrow 3 \text{LHYDROGEN} + 3 \text{ProdLCl} + 2 \text{LCARBON} + 3 \text{Cl}$                                                                       | tag_kJ6402       | Sander et al. (2014)  |
|        | tag: FHM  | ${}^{\text{FHM}}\text{CH}_3\text{CCl}_3 + h\nu \rightarrow h\nu$                                                                                                                          | tag_kJ6402       |                       |
|        | tag: FHM  | ${}^{\text{FHM}}\text{rCH}_3\text{CCl}_3 + h\nu \rightarrow h\nu$                                                                                                                         | tag_kJ6402       |                       |
| J6500  | StGJCIF   | $\text{CFCl}_3 + h\nu \rightarrow 3.0 \text{ProdLCl} + \text{LCARBON} + \text{LFLUORINE} + 3 \text{Cl}$                                                                                   | jx(ip_CFC13)     | Sander et al. (2014)  |
| J6501  | StGJCIF   | $\text{CF}_2\text{Cl}_2 + h\nu \rightarrow 2.0 \text{ProdLCl} + \text{LCARBON} + 2 \text{LFLUORINE} + 2 \text{Cl}$                                                                        | jx(ip_CF2Cl2)    | Sander et al. (2014)  |
| J7000  | StTrGJBr  | $\text{Br}_2 + h\nu \rightarrow \text{Br} + \text{Br}$                                                                                                                                    | jx(ip_Br2)       | Sander et al. (2014)  |
| J7100  | StTrGJBr  | $\text{BrO} + h\nu \rightarrow \text{Br} + \text{O}(^3\text{P})$                                                                                                                          | jx(ip_Br0)       | Sander et al. (2014)  |
| J7200  | StTrGJBr  | $\text{HOBr} + h\nu \rightarrow \text{LossO3Br} + \text{LossO3} + \text{Br} + \text{OH}$                                                                                                  | tag_kJ7200       | Sander et al. (2014)  |
|        | tag: FHM  | ${}^{\text{FHM}}\text{HOBr} + h\nu \rightarrow h\nu + {}^{\text{FHM}}\text{OH} + \text{PTPFHMOH}$                                                                                         | tag_kJ7200       |                       |
|        | tag: FHM  | ${}^{\text{FHM}}\text{rHOBr} + h\nu \rightarrow h\nu + {}^{\text{FHM}}\text{rOH} + \text{PTPFHMrOH}$                                                                                      | tag_kJ7200       |                       |
| J7300  | TrGJBrN   | $\text{BrNO}_2 + h\nu \rightarrow 1. \text{ProdO3Br} + 1. \text{ProdO3} + \text{Br} + \text{NO}_2$                                                                                        | jx(ip_BrNO2)     | Sander et al. (2014)  |
| J7301  | StTrGJBrN | $\text{BrNO}_3 + h\nu \rightarrow 5.9604645 \times 10^{-8} \text{ProdO3Br} + 5.9604645 \times 10^{-8} \text{ProdO3} + .85 \text{Br} + .85 \text{NO}_3 + .15 \text{BrO} + .15 \text{NO}_2$ | jx(ip_BrNO3)     | Sander et al. (2014)* |
| J7400  | StGJBr    | $\text{CH}_3\text{Br} + h\nu \rightarrow \text{ProdLBr} + \text{Br} + \text{CH}_3$                                                                                                        | tag_kJ7400       | Sander et al. (2014)  |
|        | tag: FHM  | ${}^{\text{FHM}}\text{CH}_3\text{Br} + h\nu \rightarrow h\nu + {}^{\text{FHM}}\text{CH}_3$                                                                                                | tag_kJ7400       |                       |
|        | tag: FHM  | ${}^{\text{FHM}}\text{rCH}_3\text{Br} + h\nu \rightarrow h\nu + {}^{\text{FHM}}\text{rCH}_3$                                                                                              | tag_kJ7400       |                       |
| J7401  | TrGJBr    | $\text{CH}_2\text{Br}_2 + h\nu \rightarrow 2 \text{LHYDROGEN} + 2 \text{ProdSBr} + \text{LCARBON} + 2 \text{Br}$                                                                          | tag_kJ7401       | Sander et al. (2014)  |
|        | tag: FHM  | ${}^{\text{FHM}}\text{CH}_2\text{Br}_2 + h\nu \rightarrow h\nu$                                                                                                                           | tag_kJ7401       |                       |
|        | tag: FHM  | ${}^{\text{FHM}}\text{rCH}_2\text{Br}_2 + h\nu \rightarrow h\nu$                                                                                                                          | tag_kJ7401       |                       |



Table 2: Photolysis reactions (... continued)

| #      | labels     | reaction                                                                                                                                             | rate coefficient | reference            |
|--------|------------|------------------------------------------------------------------------------------------------------------------------------------------------------|------------------|----------------------|
| J7402  | TrGJBr     | $\text{CHBr}_3 + h\nu \rightarrow \text{LHYDROGEN} + 3 \text{ ProdSBr} + \text{LCARBON} + 3 \text{ Br}$                                              | tag_kJ7402       | Sander et al. (2014) |
|        | tag: FHM   | $^{\text{FHM}}\text{CHBr}_3 + h\nu \rightarrow h\nu$                                                                                                 | tag_kJ7402       |                      |
|        | tag: FHM   | $^{\text{FHM}r}\text{CHBr}_3 + h\nu \rightarrow h\nu$                                                                                                | tag_kJ7402       |                      |
| J7500  | StGJBrF    | $\text{CF}_3\text{Br} + h\nu \rightarrow 1.0 \text{ ProdLBr} + \text{LCARBON} + 3 \text{ LFLUORINE} + \text{Br}$                                     | jx(ip_CF3Br)     | Sander et al. (2014) |
| J7600  | StTrGJBrCl | $\text{BrCl} + h\nu \rightarrow \text{Br} + \text{Cl}$                                                                                               | jx(ip_BrCl)      | Sander et al. (2014) |
| J7601  | StGJBrClF  | $\text{CF}_2\text{ClBr} + h\nu \rightarrow 1.0 \text{ ProdLBr} + 1.0 \text{ ProdLCl} + \text{LCARBON} + 2 \text{ LFLUORINE} + \text{Br} + \text{Cl}$ | jx(ip_CF2ClBr)   | Sander et al. (2014) |
| J7602  | TrGJBrCl   | $\text{CH}_2\text{ClBr} + h\nu \rightarrow 2 \text{ LHYDROGEN} + \text{ProdSBr} + \text{ProdSCl} + \text{LCARBON} + \text{Br} + \text{Cl}$           | tag_kJ7602       | Sander et al. (2014) |
|        | tag: FHM   | $^{\text{FHM}}\text{CH}_2\text{ClBr} + h\nu \rightarrow h\nu$                                                                                        | tag_kJ7602       |                      |
|        | tag: FHM   | $^{\text{FHM}r}\text{CH}_2\text{ClBr} + h\nu \rightarrow h\nu$                                                                                       | tag_kJ7602       |                      |
| J7603  | TrGJBrCl   | $\text{CHCl}_2\text{Br} + h\nu \rightarrow \text{LHYDROGEN} + \text{ProdSBr} + 2 \text{ ProdSCl} + \text{LCARBON} + \text{Br} + 2 \text{ Cl}$        | tag_kJ7603       | Sander et al. (2014) |
|        | tag: FHM   | $^{\text{FHM}}\text{CHCl}_2\text{Br} + h\nu \rightarrow h\nu$                                                                                        | tag_kJ7603       |                      |
|        | tag: FHM   | $^{\text{FHM}r}\text{CHCl}_2\text{Br} + h\nu \rightarrow h\nu$                                                                                       | tag_kJ7603       |                      |
| J7604  | TrGJBrCl   | $\text{CHClBr}_2 + h\nu \rightarrow \text{LHYDROGEN} + 2 \text{ ProdSBr} + \text{ProdSCl} + \text{LCARBON} + 2 \text{ Br} + \text{Cl}$               | tag_kJ7604       | Sander et al. (2014) |
|        | tag: FHM   | $^{\text{FHM}}\text{CHClBr}_2 + h\nu \rightarrow h\nu$                                                                                               | tag_kJ7604       |                      |
|        | tag: FHM   | $^{\text{FHM}r}\text{CHClBr}_2 + h\nu \rightarrow h\nu$                                                                                              | tag_kJ7604       |                      |
| J8401a | StTrGJI    | $\text{CH}_3\text{I} + h\nu \rightarrow \text{CH}_3$                                                                                                 | tag_kJ8401a      | Sander et al. (2014) |
|        | tag: FHM   | $^{\text{FHM}}\text{CH}_3\text{I} + h\nu \rightarrow h\nu + ^{\text{FHM}}\text{CH}_3$                                                                | tag_kJ8401a      |                      |
|        | tag: FHM   | $^{\text{FHM}r}\text{CH}_3\text{I} + h\nu \rightarrow h\nu + ^{\text{FHM}r}\text{CH}_3$                                                              | tag_kJ8401a      |                      |

## General notes

J-values are calculated with an external module (e.g., JVAL) and then supplied to the MECCA chemistry.

Values that originate from the Master Chemical Mechanism (MCM) by Rickard and Pascoe (2009) are translated according in the following way:

$\text{J}(11) \rightarrow \text{jx}(\text{ip\_COH2})$

$\text{J}(12) \rightarrow \text{jx}(\text{ip\_CHOH})$

$\text{J}(15) \rightarrow \text{jx}(\text{ip\_HOCH2CHO})$

$\text{J}(18) \rightarrow \text{jx}(\text{ip\_MACR})$

$\text{J}(22) \rightarrow \text{jx}(\text{ip\_ACETOL})$

$\text{J}(23)+\text{J}(24) \rightarrow \text{jx}(\text{ip\_MVK})$

$\text{J}(31)+\text{J}(32)+\text{J}(33) \rightarrow \text{jx}(\text{ip\_GLYOX})$

$\text{J}(34) \rightarrow \text{jx}(\text{ip\_MGLYOX})$

$\text{J}(41) \rightarrow \text{jx}(\text{ip\_CH300H})$

$\text{J}(53) \rightarrow \text{J}(\text{iC}_3\text{H}_7\text{ONO}_2)$

$\text{J}(54) \rightarrow \text{J}(\text{iC}_3\text{H}_7\text{ONO}_2)$

$\text{J}(55) \rightarrow \text{J}(\text{iC}_3\text{H}_7\text{ONO}_2)$

$\text{J}(56)+\text{J}(57) \rightarrow \text{jx}(\text{ip\_NOA})$

## Specific notes

J4302: It is assumed that  $\text{J}(\text{CH}_3\text{COCH}_2\text{OH})$  is 0.074 times that of J4101b.

J4304: It is assumed that  $\text{J}(\text{CH}_3\text{COCH}_2\text{O}_2\text{H})$  is the

same as J(CH<sub>3</sub>OOH).

**J4306:** Following von Kuhlmann et al. (2003), we use  $J(\text{iC}_3\text{H}_7\text{ONO}_2) = 3.7 * j_{\text{x}}(\text{ip\_PAN})$ .

**J4402:** It is assumed that J(MVKOOH) is the same as J(CH<sub>3</sub>OOH).

**J4405:** It is assumed that J(BIACET) is 2.15 times larger than J(MGLYOX), consistent with the photolysis rate coefficients used in the MCM (Rickard and Pascoe, 2009).

**J4407:** It is assumed that J(MPAN) is the same as J(PAN).

**J4500:** It is assumed that J(ISOOH) is the same as J(CH<sub>3</sub>OOH).

**J7301:** The quantum yields are recommended by Sander et al. (2011) for  $\lambda > 300\text{nm}$  and used here for the entire spectrum.

Table 3: Henry’s law coefficients

| substance                                    | $\frac{k_H^\ominus}{\text{M/atm}}$   | $\frac{-\Delta_{\text{soln}}H/R}{\text{K}}$ | reference                       |
|----------------------------------------------|--------------------------------------|---------------------------------------------|---------------------------------|
| O <sub>2</sub>                               | $1.3 \times 10^{-3}$                 | 1500.                                       | Wilhelm et al. (1977)           |
| O <sub>3</sub>                               | $1.2 \times 10^{-2}$                 | 2560.                                       | Chameides (1984)                |
| OH                                           | $3.0 \times 10^1$                    | 4300.                                       | Hanson et al. (1992)            |
| HO <sub>2</sub>                              | $3.9 \times 10^3$                    | 5900.                                       | Hanson et al. (1992)            |
| H <sub>2</sub> O <sub>2</sub>                | $1. \times 10^5$                     | 6338.                                       | Lind and Kok (1994)             |
| H <sub>2</sub> O                             | BIG                                  | 0.                                          | see note                        |
| NH <sub>3</sub>                              | 58.                                  | 4085.                                       | Chameides (1984)                |
| NO                                           | $1.9 \times 10^{-3}$                 | 1480.                                       | Schwartz and White (1981)       |
| NO <sub>2</sub>                              | $7.0 \times 10^{-3}$                 | 2500.                                       | Lee and Schwartz (1981)*        |
| NO <sub>3</sub>                              | 2.                                   | 2000.                                       | Thomas et al. (1993)            |
| N <sub>2</sub> O <sub>5</sub>                | BIG                                  | 0.                                          | see note                        |
| HONO                                         | $4.9 \times 10^1$                    | 4780.                                       | Schwartz and White (1981)       |
| HNO <sub>3</sub>                             | $2.45 \times 10^6 / 1.5 \times 10^1$ | 8694.                                       | Brimblecombe and Clegg (1989)*  |
| HNO <sub>4</sub>                             | $1.2 \times 10^4$                    | 6900.                                       | Régimbal and Mozurkewich (1997) |
| CH <sub>3</sub> OH                           | $2.20 \times 10^2$                   | 5200.                                       | Snider and Dawson (1985)        |
| CH <sub>3</sub> O <sub>2</sub>               | 6.                                   | 5600.                                       | Jacob (1986)*                   |
| CH <sub>3</sub> OOH                          | $3.0 \times 10^2$                    | 5322.                                       | Lind and Kok (1994)             |
| CO <sub>2</sub>                              | $3.1 \times 10^{-2}$                 | 2423.                                       | Chameides (1984)                |
| HCHO                                         | $7.0 \times 10^3$                    | 6425.                                       | Chameides (1984)                |
| HCOOH                                        | $3.7 \times 10^3$                    | 5700.                                       | Chameides (1984)                |
| CH <sub>3</sub> COOH                         | $4.1 \times 10^3$                    | 6200.                                       | Sander et al. (2006)            |
| PAN                                          | 2.8                                  | 5730.                                       | Sander et al. (2006)            |
| C <sub>2</sub> H <sub>5</sub> O <sub>2</sub> | 6.                                   | 5600.                                       | see note                        |
| CH <sub>3</sub> CHO                          | $1.29 \times 10^1$                   | 5890.                                       | Sander et al. (2006)            |
| CH <sub>3</sub> COCH <sub>3</sub>            | 28.1                                 | 5050.                                       | Sander et al. (2006)            |
| MGLYOX                                       | $3.70 \times 10^3$                   | 7500.                                       | Betterton and Hoffmann (1988)   |
| Cl <sub>2</sub>                              | $9.2 \times 10^{-2}$                 | 2081.                                       | Bartlett and Margerum (1999)    |
| HCl                                          | 2./1.7                               | 9001.                                       | Brimblecombe and Clegg (1989)   |
| HOCl                                         | $6.6 \times 10^2$                    | 5862.                                       | Huthwelker et al. (1995)        |
| ClNO <sub>3</sub>                            | BIG                                  | 0.                                          | see note                        |
| Br <sub>2</sub>                              | $7.7 \times 10^{-1}$                 | 3837.                                       | Bartlett and Margerum (1999)    |
| HBr                                          | 1.3                                  | 10239.                                      | Brimblecombe and Clegg (1989)*  |
| HOBr                                         | $1.3 \times 10^3$                    | 5862.                                       | Blatchley et al. (1992)*        |

Table 3: Henry’s law coefficients (... continued)

| substance                            | $k_H^\ominus$<br>M/atm | $-\Delta_{\text{soln}}H/R$<br>K | reference                     |
|--------------------------------------|------------------------|---------------------------------|-------------------------------|
| BrNO <sub>3</sub>                    | BIG                    | 0.                              | see note                      |
| BrCl                                 | $9.4 \times 10^{-1}$   | 5600.                           | Bartlett and Margerum (1999)  |
| SO <sub>2</sub>                      | 1.2                    | 3120.                           | Chameides (1984)              |
| H <sub>2</sub> SO <sub>4</sub>       | $1. \times 10^{11}$    | 0.                              | see note                      |
| CH <sub>3</sub> SO <sub>3</sub> H    | BIG                    | 0.                              | see note                      |
| DMS                                  | $5.4 \times 10^{-1}$   | 3500.                           | Staudinger and Roberts (2001) |
| DMSO                                 | $5. \times 10^4$       | 6425.                           | De Bruyn et al. (1994)*       |
| LMEKOOH                              | $1. \times 10^3$       | 0.                              | ???                           |
| CH <sub>3</sub> COCH <sub>2</sub> OH | $4.7 \times 10^2$      | 0.                              | ???                           |

## General notes

The value “BIG” corresponds to virtually infinite solubility which is represented in the model using a very large but arbitrary number.

The temperature dependence of the Henry constants is:

$$K_H = K_H^\ominus \times \exp \left( \frac{-\Delta_{\text{soln}}H}{R} \left( \frac{1}{T} - \frac{1}{T^\ominus} \right) \right)$$

where  $\Delta_{\text{soln}}H$  = molar enthalpy of dissolution [J/mol] and  $R = 8.314$  J/(mol K).

## Specific notes

NO<sub>2</sub>: The temperature dependence is from Chameides (1984).

HNO<sub>3</sub>: Calculated using the acidity constant from Davis and de Bruin (1964).

CH<sub>3</sub>O<sub>2</sub>: This value was estimated by Jacob (1986).

C<sub>2</sub>H<sub>5</sub>O<sub>2</sub>: Assumed to be the same as  $K_H(\text{CH}_3\text{O}_2)$ .

HBr: Calculated using the acidity constant from Lax (1969).

HOBr: Twice the value of HOCl, according to Blatchley et al. (1992). Same temperature dependence as for HOCl assumed.

H<sub>2</sub>SO<sub>4</sub>: To account for the very high Henry’s law coefficient of H<sub>2</sub>SO<sub>4</sub>, a very high value was chosen arbitrarily.

DMSO: Lower limit cited from another reference.

Table 4: Accommodation coefficients

| substance                                    | $\alpha^\ominus$      | $\frac{-\Delta_{\text{obs}}H/R}{K}$ | reference                     |
|----------------------------------------------|-----------------------|-------------------------------------|-------------------------------|
| O <sub>2</sub>                               | 0.01                  | 2000.                               | see note                      |
| O <sub>3</sub>                               | 0.002                 | (default)                           | DeMore et al. (1997)*         |
| OH                                           | 0.01                  | (default)                           | Takami et al. (1998)*         |
| HO <sub>2</sub>                              | 0.5                   | (default)                           | Thornton and Abbatt (2005)    |
| H <sub>2</sub> O <sub>2</sub>                | 0.077                 | 3127.                               | Worsnop et al. (1989)         |
| H <sub>2</sub> O                             | 0.0                   | (default)                           | see note                      |
| NH <sub>3</sub>                              | 0.06                  | (default)                           | DeMore et al. (1997)*         |
| NO                                           | $5.0 \times 10^{-5}$  | (default)                           | Saastad et al. (1993)*        |
| NO <sub>2</sub>                              | 0.0015                | (default)                           | Ponche et al. (1993)*         |
| NO <sub>3</sub>                              | 0.04                  | (default)                           | Rudich et al. (1996)*         |
| N <sub>2</sub> O <sub>5</sub>                | (default)             | (default)                           | DeMore et al. (1997)*         |
| HONO                                         | 0.04                  | (default)                           | DeMore et al. (1997)*         |
| HNO <sub>3</sub>                             | 0.5                   | (default)                           | Abbatt and Waschewsky (1998)* |
| HNO <sub>4</sub>                             | (default)             | (default)                           | DeMore et al. (1997)*         |
| CH <sub>3</sub> OH                           | (default)             | (default)                           | see note                      |
| CH <sub>3</sub> O <sub>2</sub>               | 0.01                  | 2000.                               | see note                      |
| CH <sub>3</sub> OOH                          | 0.0046                | 3273.                               | Magi et al. (1997)            |
| CO <sub>2</sub>                              | 0.01                  | 2000.                               | see note                      |
| HCHO                                         | 0.04                  | (default)                           | DeMore et al. (1997)*         |
| HCOOH                                        | 0.014                 | 3978.                               | DeMore et al. (1997)          |
| CH <sub>3</sub> COOH                         | $2.0 \times 10^{-2}$  | 4079.                               | Davidovits et al. (1995)      |
| PAN                                          | (default)             | (default)                           | see note                      |
| C <sub>2</sub> H <sub>5</sub> O <sub>2</sub> | (default)             | (default)                           | see note                      |
| CH <sub>3</sub> CHO                          | $3.0 \times 10^{-2}$  | (default)                           | see note                      |
| CH <sub>3</sub> COCH <sub>3</sub>            | $3.72 \times 10^{-3}$ | 6395.                               | Davidovits et al. (1995)      |
| MGLYOX                                       | (default)             | (default)                           | see note                      |
| Cl <sub>2</sub>                              | 0.038                 | 6546.                               | Hu et al. (1995)              |
| HCl                                          | 0.074                 | 3072.                               | Schweitzer et al. (2000)*     |
| HOCl                                         | 0.5                   | (default)                           | see note                      |
| ClNO <sub>3</sub>                            | 0.108                 | (default)                           | Deiber et al. (2004)*         |
| Br <sub>2</sub>                              | 0.038                 | 6546.                               | Hu et al. (1995)              |
| HBr                                          | 0.032                 | 3940.                               | Schweitzer et al. (2000)*     |
| HOBr                                         | 0.5                   | (default)                           | Abbatt and Waschewsky (1998)* |
| BrNO <sub>3</sub>                            | 0.063                 | (default)                           | Deiber et al. (2004)*         |

Table 4: Accommodation coefficients (... continued)

| substance                            | $\alpha^\ominus$ | $\frac{-\Delta_{\text{obs}}H/R}{\text{K}}$ | reference              |
|--------------------------------------|------------------|--------------------------------------------|------------------------|
| BrCl                                 | 0.038            | 6546.                                      | see note               |
| SO <sub>2</sub>                      | 0.11             | (default)                                  | DeMore et al. (1997)   |
| H <sub>2</sub> SO <sub>4</sub>       | 0.65             | (default)                                  | Pöschl et al. (1998)*  |
| CH <sub>3</sub> SO <sub>3</sub> H    | 0.076            | 1762.                                      | De Bruyn et al. (1994) |
| DMS                                  | (default)        | (default)                                  | see note               |
| DMSO                                 | 0.048            | 2578.                                      | De Bruyn et al. (1994) |
| LMEKOOH                              | (default)        | (default)                                  | ???                    |
| CH <sub>3</sub> COCH <sub>2</sub> OH | (default)        | (default)                                  | ???                    |

## General notes

If no data are available, the following default values are used:

$$\alpha^\ominus = 0.1$$

$$-\Delta_{\text{obs}}H/R = 0 \text{ K}$$

The temperature dependence of the accommodation coefficients is given by (Jayne et al., 1991):

$$\frac{\alpha}{1-\alpha} = \exp\left(\frac{-\Delta_{\text{obs}}G}{RT}\right)$$

$$= \exp\left(\frac{-\Delta_{\text{obs}}H}{RT} + \frac{\Delta_{\text{obs}}S}{R}\right)$$

where  $\Delta_{\text{obs}}G$  is the Gibbs free energy barrier of the transition state toward solution (Jayne et al., 1991), and  $\Delta_{\text{obs}}H$  and  $\Delta_{\text{obs}}S$  are the corresponding enthalpy and entropy, respectively. The equation can be rearranged to:

$$\ln\left(\frac{\alpha}{1-\alpha}\right) = \frac{-\Delta_{\text{obs}}H}{R} \times \frac{1}{T} + \frac{-\Delta_{\text{obs}}S}{R}$$

and further:

$$\text{d} \ln\left(\frac{\alpha}{1-\alpha}\right) \bigg/ \text{d}\left(\frac{1}{T}\right) = \frac{-\Delta_{\text{obs}}H}{R}$$

## Specific notes

O<sub>2</sub>: Estimate.

O<sub>3</sub>: Value measured at 292 K.

OH: Value measured at 293 K.

NH<sub>3</sub>: Value measured at 295 K.

NO: Value measured between 193 and 243 K.

NO<sub>2</sub>: Value measured at 298 K.

NO<sub>3</sub>: Value is a lower limit, measured at 273 K.

N<sub>2</sub>O<sub>5</sub>: Value for sulfuric acid, measured between 195 and 300 K.

HONO: Value measured between 247 and 297 K.

HNO<sub>3</sub>: Value measured at room temperature. Abbatt and Waschewsky (1998) say  $\gamma > 0.2$ . Here  $\alpha = 0.5$  is used.

HNO<sub>4</sub>: Value measured at 200 K for water ice.

CH<sub>3</sub>O<sub>2</sub>: Estimate.

CO<sub>2</sub>: Estimate.

HCHO: Value measured between 260 and 270 K.

PAN: Estimate.

C<sub>2</sub>H<sub>5</sub>O<sub>2</sub>: Estimate.

CH<sub>3</sub>CHO: Using the same estimate as in the CAPRAM 2.4 model ([http://projects.tropos.de/capram/capram\\_24.html](http://projects.tropos.de/capram/capram_24.html)).

HCl: Temperature dependence derived from published data at 2 different temperatures

HOCl: Assumed to be the same as  $\alpha(\text{HOBr})$ .

ClNO<sub>3</sub>: Value measured at 274.5 K.

HBr: Temperature dependence derived from published data at 2 different temperatures

HOBr: Value measured at room temperature. Abbatt and Waschewsky (1998) say  $\gamma > 0.2$ . Here  $\alpha = 0.5$  is used.

BrNO<sub>3</sub>: Value measured at 273 K.

BrCl: Assumed to be the same as  $\alpha(\text{Cl}_2)$ .

H<sub>2</sub>SO<sub>4</sub>: Value measured at 303 K.

Table 5: Reversible (Henry’s law) equilibria and irreversible (“heterogenous”) uptake

| # | labels | reaction | rate coefficient | reference |
|---|--------|----------|------------------|-----------|
|---|--------|----------|------------------|-----------|

## General notes

The forward (**k\_exf**) and backward (**k\_exb**) rate coefficients are calculated in the file `messy_mecca_aero.f90` using the accommodation coefficients in subroutine `mecca_aero_alpha` and Henry’s law constants in subroutine `mecca_aero_henry`.

For uptake of X (X = N<sub>2</sub>O<sub>5</sub>, ClNO<sub>3</sub>, or BrNO<sub>3</sub>) and subsequent reaction with H<sub>2</sub>O, Cl<sup>−</sup>, and Br<sup>−</sup> in H3201,

H6300, H6301, H6302, H7300, H7301, H7302, H7601, and H7602, we define:

$$k_{\text{exf}}(\text{X}) = \frac{k_{\text{mt}}(\text{X}) \times \text{LWC}}{[\text{H}_2\text{O}] + 5 \times 10^2 [\text{Cl}^-] + 3 \times 10^5 [\text{Br}^-]}$$

Here,  $k_{\text{mt}}$  = mass transfer coefficient, and LWC = liquid water content of the aerosol. The total uptake rate of X is only determined by  $k_{\text{mt}}$ . The factors only affect the branching between hydrolysis and the halide reac-

tions. The factor  $5 \times 10^2$  was chosen such that the chloride reaction dominates over hydrolysis at about  $[\text{Cl}^-] > 0.1 \text{ M}$  (see Fig. 3 in Behnke et al. (1997)), i.e. when the ratio  $[\text{H}_2\text{O}]/[\text{Cl}^-]$  is less than  $5 \times 10^2$ . The ratio  $5 \times 10^2 / 3 \times 10^5$  was chosen such that the reactions with chloride and bromide are roughly equal for sea water composition (Behnke et al., 1994). These ratios were measured for uptake of N<sub>2</sub>O<sub>5</sub>. Here, they are also used for ClNO<sub>3</sub> and BrNO<sub>3</sub>.

Table 6: Heterogeneous reactions

| #      | labels   | reaction                                                                                                                                                             | rate coefficient  | reference          |
|--------|----------|----------------------------------------------------------------------------------------------------------------------------------------------------------------------|-------------------|--------------------|
| HET200 | StHetN   | $\text{N}_2\text{O}_5 + \text{H}_2\text{O} \rightarrow \text{LossO3N} + \text{LossO3} + 2 \text{HNO}_3$                                                              | tag_kHET200       | see general notes* |
|        | tag: FHM | $^{\text{FHM}}\text{H}_2\text{O} + \text{N}_2\text{O}_5 \rightarrow \text{N}_2\text{O}_5 + 2.0 \text{ }^{\text{FHM}}\text{HNO}_3 + \text{PTLFHMH}_2\text{O}$         | tag_kHET200       |                    |
|        | tag: FHM | $^{\text{FHM}_r}\text{H}_2\text{O} + \text{N}_2\text{O}_5 \rightarrow \text{N}_2\text{O}_5 + 2.0 \text{ }^{\text{FHM}_r}\text{HNO}_3 + \text{PTLFHMrH}_2\text{O}$    | tag_kHET200       |                    |
| HET201 | TrHetN   | $\text{N}_2\text{O}_5 \rightarrow 3. \text{ LossO3N} + 3. \text{ LossO3} + 2 \text{ NO}_3^-(\text{aq}) + 2 \text{ H}^+(\text{aq})$                                   | khet_Tr(iht_N205) | see general notes* |
| HET410 | StHetCl  | $\text{HOCl} + \text{HCl} \rightarrow \text{LossO3Cl} + \text{LossO3} + \text{Cl}_2 + \text{H}_2\text{O}$                                                            | tag_kHET410       | see general notes* |
|        | tag: FHM | $^{\text{FHM}}\text{HOCl} + \text{HCl} \rightarrow \text{HCl} + 0.5 \text{ }^{\text{FHM}}\text{H}_2\text{O} + 0.5 \text{ PTPFHMH}_2\text{O}$                         | tag_kHET410       |                    |
|        | tag: FHM | $^{\text{FHM}_r}\text{HOCl} + \text{HCl} \rightarrow \text{HCl} + 0.5 \text{ }^{\text{FHM}_r}\text{H}_2\text{O} + 0.5 \text{ PTPFHMrH}_2\text{O}$                    | tag_kHET410       |                    |
|        | tag: FHM | $^{\text{FHM}}\text{HCl} + \text{HOCl} \rightarrow \text{HOCl} + 0.5 \text{ }^{\text{FHM}}\text{H}_2\text{O} + 0.5 \text{ PTPFHMH}_2\text{O}$                        | tag_kHET410       |                    |
|        | tag: FHM | $^{\text{FHM}_r}\text{HCl} + \text{HOCl} \rightarrow \text{HOCl} + 0.5 \text{ }^{\text{FHM}_r}\text{H}_2\text{O} + 0.5 \text{ PTPFHMrH}_2\text{O}$                   | tag_kHET410       |                    |
| HET420 | StHetClN | $\text{ClNO}_3 + \text{HCl} \rightarrow \text{LossO3Cl} + \text{LossO3} + \text{Cl}_2 + \text{HNO}_3$                                                                | tag_kHET420       | see general notes* |
|        | tag: FHM | $^{\text{FHM}}\text{HCl} + \text{ClNO}_3 \rightarrow \text{ClNO}_3 + ^{\text{FHM}}\text{HNO}_3$                                                                      | tag_kHET420       |                    |
|        | tag: FHM | $^{\text{FHM}_r}\text{HCl} + \text{ClNO}_3 \rightarrow \text{ClNO}_3 + ^{\text{FHM}_r}\text{HNO}_3$                                                                  | tag_kHET420       |                    |
| HET421 | StHetClN | $\text{ClNO}_3 + \text{H}_2\text{O} \rightarrow \text{HOCl} + \text{HNO}_3$                                                                                          | tag_kHET421       | see general notes* |
|        | tag: FHM | $^{\text{FHM}}\text{H}_2\text{O} + \text{ClNO}_3 \rightarrow \text{ClNO}_3 + ^{\text{FHM}}\text{HOCl} + ^{\text{FHM}}\text{HNO}_3 + \text{PTLFHMH}_2\text{O}$        | tag_kHET421       |                    |
|        | tag: FHM | $^{\text{FHM}_r}\text{H}_2\text{O} + \text{ClNO}_3 \rightarrow \text{ClNO}_3 + ^{\text{FHM}_r}\text{HOCl} + ^{\text{FHM}_r}\text{HNO}_3 + \text{PTLFHMrH}_2\text{O}$ | tag_kHET421       |                    |
| HET422 | StHetClN | $\text{N}_2\text{O}_5 + \text{HCl} \rightarrow \text{LossO3Cl} + \text{LossO3N} + 2 \text{ LossO3} + \text{ClNO}_2 + \text{HNO}_3$                                   | tag_kHET422       | see general notes* |
|        | tag: FHM | $^{\text{FHM}}\text{HCl} + \text{N}_2\text{O}_5 \rightarrow \text{N}_2\text{O}_5 + ^{\text{FHM}}\text{HNO}_3$                                                        | tag_kHET422       |                    |
|        | tag: FHM | $^{\text{FHM}_r}\text{HCl} + \text{N}_2\text{O}_5 \rightarrow \text{N}_2\text{O}_5 + ^{\text{FHM}_r}\text{HNO}_3$                                                    | tag_kHET422       |                    |
| HET510 | StHetBr  | $\text{HOBr} + \text{HBr} \rightarrow \text{LossO3Br} + \text{LossO3} + \text{Br}_2 + \text{H}_2\text{O}$                                                            | tag_kHET510       | see general notes* |
|        | tag: FHM | $^{\text{FHM}}\text{HOBr} + \text{HBr} \rightarrow \text{HBr} + 0.5 \text{ }^{\text{FHM}}\text{H}_2\text{O} + 0.5 \text{ PTPFHMH}_2\text{O}$                         | tag_kHET510       |                    |
|        | tag: FHM | $^{\text{FHM}_r}\text{HOBr} + \text{HBr} \rightarrow \text{HBr} + 0.5 \text{ }^{\text{FHM}_r}\text{H}_2\text{O} + 0.5 \text{ PTPFHMrH}_2\text{O}$                    | tag_kHET510       |                    |



Table 6: Heterogeneous reactions (... continued)

| #      | labels     | reaction                                                                                                                                                                   | rate coefficient | reference          |
|--------|------------|----------------------------------------------------------------------------------------------------------------------------------------------------------------------------|------------------|--------------------|
|        | tag: FHM   | ${}^{\text{FHM}}\text{HBr} + \text{HOBr} \rightarrow \text{HOBr} + 0.5 {}^{\text{FHM}}\text{H}_2\text{O} + 0.5 \text{PTPFHMH}_2\text{O}$                                   | tag_kHET510      |                    |
|        | tag: FHM   | ${}^{\text{FHM}_r}\text{HBr} + \text{HOBr} \rightarrow \text{HOBr} + 0.5 {}^{\text{FHM}_r}\text{H}_2\text{O} + 0.5 \text{PTPFHMrH}_2\text{O}$                              | tag_kHET510      |                    |
| HET520 | StHetBrN   | $\text{BrNO}_3 + \text{H}_2\text{O} \rightarrow \text{HOBr} + \text{HNO}_3$                                                                                                | tag_kHET520      | see general notes* |
|        | tag: FHM   | ${}^{\text{FHM}}\text{H}_2\text{O} + \text{BrNO}_3 \rightarrow \text{BrNO}_3 + {}^{\text{FHM}}\text{HOBr} + {}^{\text{FHM}}\text{HNO}_3 + \text{PTLFHMH}_2\text{O}$        | tag_kHET520      |                    |
|        | tag: FHM   | ${}^{\text{FHM}_r}\text{H}_2\text{O} + \text{BrNO}_3 \rightarrow \text{BrNO}_3 + {}^{\text{FHM}_r}\text{HOBr} + {}^{\text{FHM}_r}\text{HNO}_3 + \text{PTLFHMrH}_2\text{O}$ | tag_kHET520      |                    |
| HET540 | StHetBrClN | $\text{ClNO}_3 + \text{HBr} \rightarrow 0.5 \text{LossO3Br} + 0.5 \text{LossO3Cl} + \text{LossO3} + \text{BrCl} + \text{HNO}_3$                                            | tag_kHET540      | see general notes* |
|        | tag: FHM   | ${}^{\text{FHM}}\text{HBr} + \text{ClNO}_3 \rightarrow \text{ClNO}_3 + {}^{\text{FHM}}\text{HNO}_3$                                                                        | tag_kHET540      |                    |
|        | tag: FHM   | ${}^{\text{FHM}_r}\text{HBr} + \text{ClNO}_3 \rightarrow \text{ClNO}_3 + {}^{\text{FHM}_r}\text{HNO}_3$                                                                    | tag_kHET540      |                    |
| HET541 | StHetBrClN | $\text{BrNO}_3 + \text{HCl} \rightarrow 0.5 \text{LossO3Br} + 0.5 \text{LossO3Cl} + \text{LossO3} + \text{BrCl} + \text{HNO}_3$                                            | tag_kHET541      | see general notes* |
|        | tag: FHM   | ${}^{\text{FHM}}\text{HCl} + \text{BrNO}_3 \rightarrow \text{BrNO}_3 + {}^{\text{FHM}}\text{HNO}_3$                                                                        | tag_kHET541      |                    |
|        | tag: FHM   | ${}^{\text{FHM}_r}\text{HCl} + \text{BrNO}_3 \rightarrow \text{BrNO}_3 + {}^{\text{FHM}_r}\text{HNO}_3$                                                                    | tag_kHET541      |                    |
| HET542 | StHetBrCl  | $\text{HOCl} + \text{HBr} \rightarrow 0.5 \text{LossO3Br} + 0.5 \text{LossO3Cl} + \text{LossO3} + \text{BrCl} + \text{H}_2\text{O}$                                        | tag_kHET542      | see general notes* |
|        | tag: FHM   | ${}^{\text{FHM}}\text{HOCl} + \text{HBr} \rightarrow \text{HBr} + 0.5 {}^{\text{FHM}}\text{H}_2\text{O} + 0.5 \text{PTPFHMH}_2\text{O}$                                    | tag_kHET542      |                    |
|        | tag: FHM   | ${}^{\text{FHM}_r}\text{HOCl} + \text{HBr} \rightarrow \text{HBr} + 0.5 {}^{\text{FHM}_r}\text{H}_2\text{O} + 0.5 \text{PTPFHMrH}_2\text{O}$                               | tag_kHET542      |                    |
|        | tag: FHM   | ${}^{\text{FHM}}\text{HBr} + \text{HOCl} \rightarrow \text{HOCl} + 0.5 {}^{\text{FHM}}\text{H}_2\text{O} + 0.5 \text{PTPFHMH}_2\text{O}$                                   | tag_kHET542      |                    |
|        | tag: FHM   | ${}^{\text{FHM}_r}\text{HBr} + \text{HOCl} \rightarrow \text{HOCl} + 0.5 {}^{\text{FHM}_r}\text{H}_2\text{O} + 0.5 \text{PTPFHMrH}_2\text{O}$                              | tag_kHET542      |                    |
| HET543 | StHetBrCl  | $\text{HOBr} + \text{HCl} \rightarrow 0.5 \text{LossO3Br} + 0.5 \text{LossO3Cl} + \text{LossO3} + \text{BrCl} + \text{H}_2\text{O}$                                        | tag_kHET543      | see general notes* |
|        | tag: FHM   | ${}^{\text{FHM}}\text{HOBr} + \text{HCl} \rightarrow \text{HCl} + 0.5 {}^{\text{FHM}}\text{H}_2\text{O} + 0.5 \text{PTPFHMH}_2\text{O}$                                    | tag_kHET543      |                    |
|        | tag: FHM   | ${}^{\text{FHM}_r}\text{HOBr} + \text{HCl} \rightarrow \text{HCl} + 0.5 {}^{\text{FHM}_r}\text{H}_2\text{O} + 0.5 \text{PTPFHMrH}_2\text{O}$                               | tag_kHET543      |                    |
|        | tag: FHM   | ${}^{\text{FHM}}\text{HCl} + \text{HOBr} \rightarrow \text{HOBr} + 0.5 {}^{\text{FHM}}\text{H}_2\text{O} + 0.5 \text{PTPFHMH}_2\text{O}$                                   | tag_kHET543      |                    |

Table 6: Heterogeneous reactions (... continued)

| # | labels   | reaction                                                                                                                                                                 | rate coefficient | reference |
|---|----------|--------------------------------------------------------------------------------------------------------------------------------------------------------------------------|------------------|-----------|
|   | tag: FHM | $\text{FHM}_{\text{r}}\text{HCl} + \text{HOBr} \rightarrow \text{HOBr} + 0.5 \text{ FHM}_{\text{r}}\text{H}_2\text{O} + 0.5 \text{ PTPFHM}_{\text{r}}\text{H}_2\text{O}$ | tag_kHET543      |           |

## General notes

Heterogeneous reaction rates are calculated with an external module (e.g., MECCA\_KHET) and then supplied to the MECCA chemistry (see [www.messy-interface.org](http://www.messy-interface.org) for details)

Table 7: Acid-base and other equilibria

| # | labels | reaction | $K_0[M^{m-n}]$ | $-\Delta H/R[K]$ | reference |
|---|--------|----------|----------------|------------------|-----------|
|---|--------|----------|----------------|------------------|-----------|

Specific notes

Table 8: Aqueous phase reactions

| # | labels | reaction | $k_0$ [ $M^{1-n}s^{-1}$ ] | $-E_a/R[K]$ | reference |
|---|--------|----------|---------------------------|-------------|-----------|
|---|--------|----------|---------------------------|-------------|-----------|

**Specific notes**

## References

- Abbatt, J. P. D. and Waschewsky, G. C. G.: Heterogeneous interactions of HOBr, HNO<sub>3</sub>, O<sub>3</sub>, and NO<sub>2</sub> with deliquescent NaCl aerosols at room temperature, *J. Phys. Chem. A*, 102, 3719–3725, 1998.
- Albaladejo, J., Jiménez, E., Notario, A., Cabañas, B., and Martínez, E.: CH<sub>3</sub>O yield in the CH<sub>3</sub> + O<sub>3</sub> reaction using the LP/LIF technique at room temperature, *J. Phys. Chem. A*, 106, 2512–2519, doi:10.1021/jp012249o, 2002.
- Anderson, L. C. and Fahey, D. W.: Studies with ClONO<sub>2</sub>: Thermal dissociation rate and catalytic conversion to NO using an NO/O<sub>3</sub> chemiluminescence detector, *J. Phys. Chem.*, 94, 644–652, 1990.
- Aranda, A., Le Bras, G., La Verdet, G., and Poulet, G.: The BrO + CH<sub>3</sub>O<sub>2</sub> reaction: Kinetics and role in the atmospheric ozone budget, *Geophys. Res. Lett.*, 24, 2745–2748, 1997.
- Atkinson, R.: Gas-phase tropospheric chemistry of volatile organic compounds: 1. Alkanes and alkenes, *J. Phys. Chem. Ref. Data*, 26, 215–290, 1997.
- Atkinson, R.: Kinetics of the gas-phase reactions of OH radicals with alkanes and cycloalkanes, *Atmos. Chem. Phys.*, 3, 2233–2307, 2003.
- Atkinson, R., Baulch, D. L., Cox, R. A., Crowley, J. N., Hampson, R. F., Hynes, R. G., Jenkin, M. E., Rossi, M. J., and Troe, J.: Evaluated kinetic and photochemical data for atmospheric chemistry: Volume I – gas phase reactions of O<sub>x</sub>, HO<sub>x</sub>, NO<sub>x</sub> and SO<sub>x</sub> species, *Atmos. Chem. Phys.*, 4, 1461–1738, 2004.
- Atkinson, R., Baulch, D. L., Cox, R. A., Crowley, J. N., Hampson, R. F., Hynes, R. G., Jenkin, M. E., Rossi, M. J., Troe, J., and IUPAC Subcommittee: Evaluated kinetic and photochemical data for atmospheric chemistry: Volume II – gas phase reactions of organic species, *Atmos. Chem. Phys.*, 6, 3625–4055, 2006.
- Atkinson, R., Baulch, D. L., Cox, R. A., Crowley, J. N., Hampson, R. F., Hynes, R. G., Jenkin, M. E., Rossi, M. J., and Troe, J.: Evaluated kinetic and photochemical data for atmospheric chemistry: Volume III – gas phase reactions of inorganic halogens, *Atmos. Chem. Phys.*, 7, 981–1191, 2007.
- Barone, S. B., Turnipseed, A. A., and Ravishankara, A. R.: Role of adducts in the atmospheric oxidation of dimethyl sulfide, *Faraday Discuss.*, 100, 39–54, 1995.
- Bartlett, W. P. and Margerum, D. W.: Temperature dependencies of the Henry’s law constant and the aqueous phase dissociation constant of bromine chloride, *Environ. Sci. Technol.*, 33, 3410–3414, 1999.
- Baulch, D. L., Bowman, C. T., Cobos, C. J., Cox, R. A., Just, T., Kerr, J. A., Pilling, M. J., Stocker, D., Troe, J., Tsang, W., Walker, R. W., and Warnatz, J.: Evaluated kinetic data for combustion modeling: Supplement II, *J. Phys. Chem. Ref. Data*, 34, 757–1397, 2005.
- Bedjanian, Y., Laverdet, G., and Le Bras, G.: Low-pressure study of the reaction of Cl atoms with isoprene, *J. Phys. Chem. A*, 102, 953–959, 1998.
- Behnke, W., Scheer, V., and Zetzsch, C.: Production of BrNO<sub>2</sub>, Br<sub>2</sub> and ClNO<sub>2</sub> from the reaction between sea spray aerosol and N<sub>2</sub>O<sub>5</sub>, *J. Aerosol Sci.*, 25, S277–S278, 1994.
- Behnke, W., George, C., Scheer, V., and Zetzsch, C.: Production and decay of ClNO<sub>2</sub> from the reaction of gaseous N<sub>2</sub>O<sub>5</sub> with NaCl solution: Bulk and aerosol experiments, *J. Geophys. Res.*, 102D, 3795–3804, 1997.
- Betterton, E. A. and Hoffmann, M. R.: Henry’s law constants of some environmentally important aldehydes, *Environ. Sci. Technol.*, 22, 1415–1418, 1988.
- Blatchley, III, E. R., Johnson, R. W., Alleman, J. E., and McCoy, W. F.: Effective Henry’s law constants for free chlorine and free bromine, *Wat. Res.*, 26, 99–106, 1992.
- Bossolasco, A., Faragó, E. P., Schoemaeker, C., and Fittschen, C.: Rate constant of the reaction between CH<sub>3</sub>O<sub>2</sub> and OH radicals, *Chem. Phys. Lett.*, 593, 7–13, doi:10.1016/j.cplett.2013.12.052, 2014.
- Boyd, A. A., Flaud, P.-M., Daugey, N., and Lesclaux, R.: Rate constants for RO<sub>2</sub> + HO<sub>2</sub> reactions measured under a large excess of HO<sub>2</sub>, *J. Phys. Chem. A*, 107, 818–821, 2003.
- Brimblecombe, P. and Clegg, S. L.: Erratum, *J. Atmos. Chem.*, 8, 95, 1989.
- Burkholder, J. B., Sander, S. P., Abbatt, J., Barker, J. R., Huie, R. E., Kolb, C. E., Kurylo, M. J., Orkin, V. L., Wilmouth, D. M., and Wine, P. H.: Chemical Kinetics and Photochemical Data for Use in Atmospheric Studies, Evaluation No. 18, JPL Publication 15-10, Jet Propulsion Laboratory, Pasadena, <http://jpldataeval.jpl.nasa.gov>, 2015.
- Canosa-Mas, C. E., King, M. D., Lopez, R., Percival, C. J., Wayne, R. P., Shallcross, D. E., Pyle, J. A., and Daele, V.: Is the reaction between CH<sub>3</sub>(O)O<sub>2</sub> and NO<sub>3</sub> important in the night-time troposphere?, *J. Chem. Soc. Faraday Trans.*, 92, 2211–2222, 1996.

- Chai, J., Hu, H., Dibble, T. S., Tyndall, G. S., and Orlando, J. J.: Rate constants and kinetic isotope effects for methoxy radical reacting with  $\text{NO}_2$  and  $\text{O}_2$ , *J. Phys. Chem. A*, 118, 3552–3563, doi:10.1021/jp501205d, 2014.
- Chameides, W. L.: The photochemistry of a remote marine stratiform cloud, *J. Geophys. Res.*, 89D, 4739–4755, 1984.
- Clyne, M. A. A. and Cruse, H. W.: Atomic resonance fluorescence spectrometry for the rate constants of rapid bimolecular reactions. Part 2. Reactions  $\text{Cl} + \text{BrCl}$ ,  $\text{Cl} + \text{Br}_2$ ,  $\text{Cl} + \text{ICl}$ ,  $\text{Br} + \text{IBr}$ ,  $\text{Br} + \text{ICl}$ , *J. Chem. Soc. Faraday Trans. 2*, 68, 1377–1387, 1972.
- Davidovits, P., Hu, J. H., Worsnop, D. R., Zahniser, M. S., and Kolb, C. E.: Entry of gas molecules into liquids, *Faraday Discuss.*, 100, 65–81, 1995.
- Davis, Jr., W. and de Bruin, H. J.: New activity coefficients of 0–100 per cent aqueous nitric acid, *J. Inorg. Nucl. Chem.*, 26, 1069–1083, 1964.
- De Bruyn, W. J., Shorter, J. A., Davidovits, P., Worsnop, D. R., Zahniser, M. S., and Kolb, C. E.: Uptake of gas-phase sulfur species methanesulfonic acid, dimethylsulfoxide, and dimethyl sulfone by aqueous surfaces, *J. Geophys. Res.*, 99D, 16 927–16 932, 1994.
- Deiber, G., George, C., Le Calvé, S., Schweitzer, F., and Mirabel, P.: Uptake study of  $\text{ClONO}_2$  and  $\text{BrONO}_2$  by halide containing droplets, *Atmos. Chem. Phys.*, 4, 1291–1299, 2004.
- DeMore, W. B., Sander, S. P., Golden, D. M., Hampson, R. F., Kurylo, M. J., Howard, C. J., Ravishankara, A. R., Kolb, C. E., and Molina, M. J.: Chemical kinetics and photochemical data for use in stratospheric modeling. Evaluation number 12, JPL Publication 97-4, Jet Propulsion Laboratory, Pasadena, CA, 1997.
- Dillon, T. J., Horowitz, A., Hölscher, D., Crowley, J. N., Vereecken, L., and Peeters, J.: Reaction of HO with hydroxyacetone ( $\text{HOCH}_2\text{C}(\text{O})\text{CH}_3$ ): rate coefficients (233–363 K) and mechanism, *Phys. Chem. Chem. Phys.*, 8, 236–246, 2006.
- Dolson, D. A. and Leone, S. R.: A reinvestigation of the laser-initiated chlorine/hydrogen bromide chain reaction: absolute rate constants and the  $v = 2/v = 1$  ratio from chlorine atom + hydrogen bromide  $\rightarrow$  hydrogen chloride( $v$ ) + bromine atom, *J. Phys. Chem.*, 91, 3543–3550, 1987.
- Hanson, D. R., Burkholder, J. B., Howard, C. J., and Ravishankara, A. R.: Measurement of OH and  $\text{HO}_2$  radical uptake coefficients on water and sulfuric acid surfaces, *J. Phys. Chem.*, 96, 4979–4985, 1992.
- Hu, J. H., Shi, Q., Davidovits, P., Worsnop, D. R., Zahniser, M. S., and Kolb, C. E.: Reactive uptake of  $\text{Cl}_2(\text{g})$  and  $\text{Br}_2(\text{g})$  by aqueous surfaces as a function of  $\text{Br}^-$  and  $\text{I}^-$  ion concentration: The effect of chemical reaction at the interface, *J. Phys. Chem.*, 99, 8768–8776, 1995.
- Huthwelker, T., Clegg, S. L., Peter, T., Carslaw, K., Luo, B. P., and Brimblecombe, P.: Solubility of  $\text{HOCl}$  in water and aqueous  $\text{H}_2\text{SO}_4$  to stratospheric temperatures, *J. Atmos. Chem.*, 21, 81–95, 1995.
- Hynes, A. J. and Wine, P. H.: The atmospheric chemistry of dimethylsulfoxide (DMSO) kinetics and mechanism of the OH + DMSO reaction, *J. Atmos. Chem.*, 24, 23–37, 1996.
- Ingham, T., Bauer, D., Sander, R., Crutzen, P. J., and Crowley, J. N.: Kinetics and products of the reactions  $\text{BrO} + \text{DMS}$  and  $\text{Br} + \text{DMS}$  at 298 K, *J. Phys. Chem. A*, 103, 7199–7209, 1999.
- Jacob, D. J.: Chemistry of OH in remote clouds and its role in the production of formic acid and peroxy-monosulfate, *J. Geophys. Res.*, 91D, 9807–9826, 1986.
- Jayne, J. T., Duan, S. X., Davidovits, P., Worsnop, D. R., Zahniser, M. S., and Kolb, C. E.: Uptake of gas-phase alcohol and organic acid molecules by water surfaces, *J. Phys. Chem.*, 95, 6329–6336, 1991.
- Jefferson, A., Nicovich, J. M., and Wine, P. H.: Temperature-dependent kinetics studies of the reactions  $\text{Br}(^2\text{P}_{3/2}) + \text{CH}_3\text{SCH}_3 \leftrightarrow \text{CH}_3\text{SCH}_2 + \text{HBr}$ . Heat of formation of the  $\text{CH}_3\text{SCH}_2$  radical, *J. Phys. Chem.*, 98, 7128–7135, 1994.
- Jenkin, M., Saunders, S. M., and Pilling, M. J.: The tropospheric degradation of volatile organic compounds: A protocol for mechanism development, *Atmos. Environ.*, 31, 81–104, 1997.
- Kircher, C. C. and Sander, S. P.: Kinetics and mechanism of  $\text{HO}_2$  and  $\text{DO}_2$  disproportionations, *J. Phys. Chem.*, 88, 2082–2091, 1984.
- Kirchner, F. and Stockwell, W. R.: Effect of peroxy radical reactions on the predicted concentrations of ozone, nitrogenous compounds, and radicals, *J. Geophys. Res.*, 101D, 21 007–21 022, 1996.
- Kohlmann, J.-P. and Poppe, D.: The tropospheric gas-phase degradation of  $\text{NH}_3$  and its impact on the formation of  $\text{N}_2\text{O}$  and  $\text{NO}_x$ , *J. Atmos. Chem.*, 32, 397–415, 1999.

- Kondo, O. and Benson, S. W.: Kinetics and equilibria in the system  $\text{Br} + \text{CH}_3\text{OOH} \rightleftharpoons \text{HBr} + \text{CH}_3\text{OO}$ . An upper limit for the heat of formation of the methylperoxy radical, *J. Phys. Chem.*, 88, 6675–6680, 1984.
- Lax, E.: Taschenbuch für Chemiker und Physiker, Springer Verlag, Berlin, 1969.
- Lee, Y.-N. and Schwartz, S. E.: Reaction kinetics of nitrogen dioxide with liquid water at low partial pressure, *J. Phys. Chem.*, 85, 840–848, 1981.
- Lind, J. A. and Kok, G. L.: Correction to “Henry’s law determinations for aqueous solutions of hydrogen peroxide, methylhydroperoxide, and peroxyacetic acid” by John A. Lind and Gregory L. Kok, *J. Geophys. Res.*, 99D, 21 119, 1994.
- Magi, L., Schweitzer, F., Pallares, C., Cherif, S., Mirabel, P., and George, C.: Investigation of the uptake rate of ozone and methyl hydroperoxide by water surfaces, *J. Phys. Chem. A*, 101, 4943–4949, 1997.
- Manion, J. A., Huie, R. E., Levin, R. D., Burgess, Jr., D. R., Orkin, V. L., Tsang, W., McGivern, W. S., Hudgens, J. W., Knyazev, V. D., Atkinson, D. B., Chai, E., Tereza, A. M., Lin, C.-Y., Allison, T. C., Mallard, W. G., Westley, F., Herron, J. T., Hampson, R. F., and Frizzell, D. H.: NIST Chemical Kinetics Database, NIST Standard Reference Database 17 (Web Version), <http://kinetics.nist.gov>, 2015.
- McCabe, D. C., Gierczak, T., Talukdar, R. K., and Ravishankara, A. R.: Kinetics of the reaction  $\text{OH} + \text{CO}$  under atmospheric conditions, *Geophys. Res. Lett.*, 28, 3135–3138, 2001.
- Müller, J.-F. and Brasseur, G.: IMAGES: A three-dimensional chemical transport model of the global troposphere, *J. Geophys. Res.*, 100D, 16 445–16 490, 1995.
- Nielsen, O. J., Sidebottom, H. W., Donlon, M., and Treacy, J.: Rate constants for the gas-phase reactions of OH radicals and Cl atoms with *n*-alkyl nitrites at atmospheric pressure and 298 K, *Int. J. Chem. Kinetics*, 23, 1095–1109, doi:10.1002/kin.550231204, 1991.
- Orlando, J. J. and Tyndall, G. S.: Rate coefficients for the thermal decomposition of  $\text{BrONO}_2$  and the heat of formation of  $\text{BrONO}_2$ , *J. Phys. Chem.*, 100, 19 398–19 405, 1996.
- Orlando, J. J., Tyndall, G. S., Bertman, S. B., Chen, W., and Burkholder, J. B.: Rate coefficient for the reaction of OH with  $\text{CH}_2=\text{C}(\text{CH}_3)\text{C}(\text{O})\text{OONO}_2$  (MPAN), *Atmos. Environ.*, 36, 1895–1900, 2002.
- Paulot, F., Wunch, D., Crounse, J. D., Toon, G. C., Millet, D. B., DeCarlo, P. F., Vigouroux, C., Deutscher, N. M., González Abad, G., Notholt, J., Warneke, T., Hannigan, J. W., Warneke, C., de Gouw, J. A., Dunlea, E. J., De Mazière, M., Griffith, D. W. T., Bernath, P., Jimenez, J. L., and Wennberg, P. O.: Importance of secondary sources in the atmospheric budgets of formic and acetic acids, *Atmos. Chem. Phys.*, 11, 1989–2013, doi:10.5194/acp-11-1989-2011, 2011.
- Ponche, J. L., George, C., and Mirabel, P.: Mass transfer at the air/water interface: Mass accommodation coefficients of  $\text{SO}_2$ ,  $\text{HNO}_3$ ,  $\text{NO}_2$  and  $\text{NH}_3$ , *J. Atmos. Chem.*, 16, 1–21, 1993.
- Pöschl, U., Canagaratna, M., Jayne, J. T., Molina, L. T., Worsnop, D. R., Kolb, C. E., and Molina, M. J.: Mass accommodation coefficient of  $\text{H}_2\text{SO}_4$  vapor on aqueous sulfuric acid surfaces and gaseous diffusion coefficient of  $\text{H}_2\text{SO}_4$  in  $\text{N}_2/\text{H}_2\text{O}$ , *J. Phys. Chem. A*, 102, 10 082–10 089, 1998.
- Pöschl, U., von Kuhlmann, R., Poisson, N., and Crutzen, P. J.: Development and intercomparison of condensed isoprene oxidation mechanisms for global atmospheric modeling, *J. Atmos. Chem.*, 37, 29–52, 2000.
- Régimbal, J.-M. and Mozurkewich, M.: Peroxynitric acid decay mechanisms and kinetics at low pH, *J. Phys. Chem. A*, 101, 8822–8829, 1997.
- Rickard, A. and Pascoe, S.: The Master Chemical Mechanism (MCM), <http://mcm.leeds.ac.uk>, 2009.
- Roble, R. G.: Energetics of the mesosphere and thermosphere, in: *The upper Mesosphere and Lower Thermosphere: A Review of Experiment and Theory*, Geophysical Monograph 87, edited by Johnson, R. M. and Killeen, T. L., pp. 1–23, American Geophysical Union, Washington, DC, USA, 1995.
- Roelofs, G.-J. and Lelieveld, J.: Model study of the influence of cross-tropopause  $\text{O}_3$  transports of tropospheric  $\text{O}_3$  levels, *Tellus*, 49B, 38–55, 1997.
- Rudich, Y., Talukdar, R. K., Imamura, T., Fox, R. W., and Ravishankara, A. R.: Uptake of  $\text{NO}_3$  on KI solutions: Rate coefficient for the  $\text{NO}_3 + \text{I}^-$  reaction and gas-phase diffusion coefficients for  $\text{NO}_3$ , *Chem. Phys. Lett.*, 261, 467–473, 1996.
- Saastad, O. W., Ellermann, T., and Nielsen, C. J.: On the adsorption of NO and  $\text{NO}_2$  on cold  $\text{H}_2\text{O}/\text{H}_2\text{SO}_4$  surfaces, *Geophys. Res. Lett.*, 20, 1191–1193, 1993.
- Sander, R., Jöckel, P., Kirner, O., Kunert, A. T., Landgraf, J., and Pozzer, A.: The photolysis module JVAL-14, compatible with the MESSy standard, and the JVal PreProcessor (JVPP), *Geosci. Model Dev.*, 7, 2653–2662, <http://www.geosci-model-dev.net/7/2653/>, 2014.

- Sander, S. P., Friedl, R. R., Golden, D. M., Kurylo, M. J., Moortgat, G. K., Keller-Rudek, H., Wine, P. H., Ravishankara, A. R., Kolb, C. E., Molina, M. J., Finlayson-Pitts, B. J., Huie, R. E., and Orkin, V. L.: Chemical Kinetics and Photochemical Data for Use in Atmospheric Studies, Evaluation Number 15, JPL Publication 06-2, Jet Propulsion Laboratory, Pasadena, CA, <http://jpldataeval.jpl.nasa.gov>, 2006.
- Sander, S. P., Abbatt, J., Barker, J. R., Burkholder, J. B., Friedl, R. R., Golden, D. M., Huie, R. E., Kolb, C. E., Kurylo, M. J., Moortgat, G. K., Orkin, V. L., and Wine, P. H.: Chemical Kinetics and Photochemical Data for Use in Atmospheric Studies, Evaluation No. 17, JPL Publication 10-6, Jet Propulsion Laboratory, Pasadena, <http://jpldataeval.jpl.nasa.gov>, 2011.
- Schwartz, S. E. and White, W. H.: Solubility equilibria of the nitrogen oxides and oxyacids in dilute aqueous solution, in: *Advances in Environmental Science and Engineering*, edited by Pfafflin, J. R. and Ziegler, E. N., vol. 4, pp. 1–45, Gordon and Breach Science Publishers, NY, 1981.
- Schweitzer, F., Mirabel, P., and George, C.: Uptake of hydrogen halides by water droplets, *J. Phys. Chem. A*, 104, 72–76, 2000.
- Sivakumaran, V., Hölscher, D., Dillon, T. J., and Crowley, J. N.: Reaction between OH and HCHO: temperature dependent rate coefficients (202–399 K) and product pathways (298 K), *Phys. Chem. Chem. Phys.*, 5, 4821–4827, 2003.
- Snider, J. R. and Dawson, G. A.: Tropospheric light alcohols, carbonyls, and acetonitrile: Concentrations in the southwestern United States and Henry’s law data, *J. Geophys. Res.*, 90D, 3797–3805, 1985.
- Sokolov, O., Hurley, M. D., Ball, J. C., Wallington, T. J., Nelsen, W., Barnes, I., and Becker, K. H.: Kinetics of the reactions of chlorine atoms with  $\text{CH}_3\text{ONO}$  and  $\text{CH}_3\text{ONO}_2$ , *Int. J. Chem. Kinetics*, 31, 357–359, 1999.
- Staudinger, J. and Roberts, P. V.: A critical compilation of Henry’s law constant temperature dependence relations for organic compounds in dilute aqueous solutions, *Chemosphere*, 44, 561–576, 2001.
- T. J. Wallington et al.: IUPAC Task group on atmospheric chemical kinetic data evaluation: Evaluated kinetic data, <http://iupac.pole-ether.fr>, 2014.
- Takami, A., Kato, S., Shimono, A., and Koda, S.: Uptake coefficient of OH radical on aqueous surface, *Chem. Phys.*, 231, 215–227, 1998.
- Thomas, K., Volz-Thomas, A., and Kley, D.: Zur Wechselwirkung von  $\text{NO}_3$ -Radikalen mit wässrigen Lösungen: Bestimmung des Henry- und des Massennakkomodationskoeffizienten, Ph.D. thesis, Institut für Chemie und Dynamik der Geosphäre 2, Forschungszentrum Jülich GmbH, Germany, 1993.
- Thornton, J. and Abbatt, J. P. D.: Measurements of  $\text{HO}_2$  uptake to aqueous aerosol: Mass accommodation coefficients and net reactive loss, *J. Geophys. Res.*, 110D, doi:10.1029/2004JD005402, 2005.
- Tyndall, G. S., Staffelbach, T. A., Orlando, J. J., and Calvert, J. G.: Rate coefficients for the reactions of OH radicals with methylglyoxal and acetaldehyde, *Int. J. Chem. Kinetics*, 27, 1009–1020, 1995.
- Tyndall, G. S., Cox, R. A., Granier, C., Lesclaux, R., Moortgat, G. K., Pilling, M. J., Ravishankara, A. R., and Wallington, T. J.: The atmospheric chemistry of small organic peroxy radicals, *J. Geophys. Res.*, 106D, 12 157–12 182, 2001.
- von Kuhlmann, R.: Tropospheric photochemistry of ozone, its precursors and the hydroxyl radical: A 3D-modeling study considering non-methane hydrocarbons, Ph.D. thesis, Johannes Gutenberg-Universität, Mainz, Germany, 2001.
- von Kuhlmann, R., Lawrence, M. G., Crutzen, P. J., and Rasch, P. J.: A model for studies of tropospheric ozone and nonmethane hydrocarbons: Model description and ozone results, *J. Geophys. Res.*, 108D, 4294, doi:10.1029/2002JD002893, 2003.
- Wallington, T. J., Ammann, M., Cox, R. A., Crowley, J. N., Jenkin, M. E., Mellouki, A., Rossi, M. J., Troe, J., and Cox, B.: IUPAC task group on atmospheric chemical kinetic data evaluation, <http://iupac.pole-ether.fr>.
- Wilhelm, E., Battino, R., and Wilcock, R. J.: Low-pressure solubility of gases in liquid water, *Chem. Rev.*, 77, 219–262, 1977.
- Worsnop, D. R., Zahniser, M. S., Kolb, C. E., Gardner, J. A., Watson, L. R., van Doren, J. M., Jayne, J. T., and Davidovits, P.: The temperature dependence of mass accommodation of  $\text{SO}_2$  and  $\text{H}_2\text{O}_2$  on aqueous surfaces, *J. Phys. Chem.*, 93, 1159–1172, 1989.
- Zellner, R., Hartmann, D., Karthäuser, J., Rhäsa, D., and Weibring, G.: A laser photolysis/LIF study of the reactions of  $\text{O}(^3\text{P})$  atoms with  $\text{CH}_3$  and  $\text{CH}_3\text{O}_2$  radicals, *J. Chem. Soc. Faraday Trans. 2*, 84, 549–568, doi:10.1039/f29888400549, 1988.
